# Supplementary material for: Effect of Doping on the Bandgap of the Organic–Inorganic Hybrid Ferroelectric Material [C6N2H18]Bi1−xSbxI5 (0.0 < x < 1.0)
Source: MDPI journal article supplement (doi:10.3390/app122010454), 2022-10-17
Supplement: s1 [file s1]

Archive with 2 entries (2 files):
- Crystal structure parameters.pdf
- Supporting Information.pdf
