# Supplementary material for: Effect of Doping on the Bandgap of the Organic–Inorganic Hybrid Ferroelectric Material [C6N2H18]Bi1−xSbxI5 (0.0 < x < 1.0)
Source: MDPI journal article supplement (doi:10.3390/app122010454), 2022-10-17
Supplement: s1 [file s1]

Reflex Summary Report for Rietveld Refinement of [C<sub>6</sub>N<sub>2</sub>H<sub>18</sub>]BiI<sub>5</sub>:

Lattice Parameters

Lattice Type: Triclinic Space Group: P 1

| Parameter | Value                       | Refined? |
|-----------|-----------------------------|----------|
| a         | 15.11869 ± 0.08427          | Yes      |
| b         | 14.26340 ± 0.07887          | Yes      |
| c         | 8.63905 ± 0.04962           | Yes      |
| α         | 90.00000 ± 0.00000          | Yes      |
| β         | 90.00000 ± 0.00000          | Yes      |
| γ         | 90.00000 ± 2824008413.66867 | Yes      |

Errors are unusually large: This may be due to correlations between refined parameters.

Structure Parameters

Refined Motion Groups: 0  
Refined Torsions: 0

Refined Angles: 0  
Refined Distances: 0

Number of Refined DOF: 0

Fractional Coordinates

| No. | Name | u       | v       | w       | Refined? |
|-----|------|---------|---------|---------|----------|
| 1   | Bi1  | 0.38917 | 0.62103 | 0.50315 | No       |
| 2   | Bi2  | 0.61083 | 0.37897 | 0.00315 | No       |
| 3   | Bi3  | 0.88917 | 0.87897 | 0.50315 | No       |
| 4   | Bi4  | 0.11083 | 0.12103 | 0.00315 | No       |
| 5   | I1   | 0.48458 | 0.51909 | 0.21060 | No       |
| 6   | I2   | 0.51542 | 0.48091 | 0.71060 | No       |
| 7   | I3   | 0.98458 | 0.98091 | 0.21060 | No       |
| 8   | I4   | 0.01542 | 0.01909 | 0.71060 | No       |
| 9   | I5   | 0.25948 | 0.45560 | 0.50969 | No       |
| 10  | I6   | 0.74052 | 0.54440 | 0.00969 | No       |
| 11  | I7   | 0.75948 | 0.04440 | 0.50969 | No       |
| 12  | I8   | 0.24052 | 0.95560 | 0.00969 | No       |
| 13  | I9   | 0.29912 | 0.73228 | 0.26645 | No       |
| 14  | I10  | 0.70088 | 0.26772 | 0.76645 | No       |
| 15  | I11  | 0.79912 | 0.76772 | 0.26645 | No       |
| 16  | I12  | 0.20088 | 0.23228 | 0.76645 | No       |
| 17  | I13  | 0.30809 | 0.69835 | 0.78842 | No       |
| 18  | I14  | 0.69191 | 0.30165 | 0.28842 | No       |
| 19  | I15  | 0.80809 | 0.80165 | 0.78842 | No       |

|    |     |         |         |         |    |
|----|-----|---------|---------|---------|----|
| 20 | I16 | 0.19191 | 0.19835 | 0.28842 | No |
| 21 | I17 | 0.54645 | 0.76181 | 0.52133 | No |
| 22 | I18 | 0.45355 | 0.23819 | 0.02133 | No |
| 23 | I19 | 0.04645 | 0.73819 | 0.52133 | No |
| 24 | I20 | 0.95355 | 0.26181 | 0.02133 | No |
| 25 | N1  | 0.45000 | 0.29950 | 0.42990 | No |
| 26 | N2  | 0.55000 | 0.70050 | 0.92990 | No |
| 27 | N3  | 0.95000 | 0.20050 | 0.42990 | No |
| 28 | N4  | 0.05000 | 0.79950 | 0.92990 | No |
| 29 | N5  | 0.19340 | 0.94140 | 0.42680 | No |
| 30 | N6  | 0.80660 | 0.05860 | 0.92680 | No |
| 31 | N7  | 0.69340 | 0.55860 | 0.42680 | No |
| 32 | N8  | 0.30660 | 0.44140 | 0.92680 | No |
| 33 | H1  | 0.43960 | 0.27810 | 0.33200 | No |
| 34 | H2  | 0.56040 | 0.72190 | 0.83200 | No |
| 35 | H3  | 0.93960 | 0.22190 | 0.33200 | No |
| 36 | H4  | 0.06040 | 0.77810 | 0.83200 | No |
| 37 | H5  | 0.50570 | 0.32420 | 0.43520 | No |
| 38 | H6  | 0.49430 | 0.67580 | 0.93520 | No |
| 39 | H7  | 0.00570 | 0.17580 | 0.43520 | No |
| 40 | H8  | 0.99430 | 0.82420 | 0.93520 | No |
| 41 | H9  | 0.40970 | 0.34510 | 0.45430 | No |
| 42 | H10 | 0.59030 | 0.65490 | 0.95430 | No |
| 43 | H11 | 0.90970 | 0.15490 | 0.45430 | No |
| 44 | H12 | 0.09030 | 0.84510 | 0.95430 | No |
| 45 | H13 | 0.22060 | 0.90500 | 0.35380 | No |
| 46 | H14 | 0.77940 | 0.09500 | 0.85380 | No |
| 47 | H15 | 0.72060 | 0.59500 | 0.35380 | No |
| 48 | H16 | 0.27940 | 0.40500 | 0.85380 | No |
| 49 | H17 | 0.17940 | 0.99870 | 0.38510 | No |
| 50 | H18 | 0.82060 | 0.00130 | 0.88510 | No |
| 51 | H19 | 0.67940 | 0.50130 | 0.38510 | No |
| 52 | H20 | 0.32060 | 0.49870 | 0.88510 | No |
| 53 | H21 | 0.14300 | 0.91200 | 0.45950 | No |
| 54 | H22 | 0.85700 | 0.08800 | 0.95950 | No |
| 55 | H23 | 0.64300 | 0.58800 | 0.45950 | No |
| 56 | H24 | 0.35700 | 0.41200 | 0.95950 | No |
| 57 | H25 | 0.37870 | 0.20070 | 0.55210 | No |

|    |     |         |         |         |    |
|----|-----|---------|---------|---------|----|
| 58 | H26 | 0.62130 | 0.79930 | 0.05210 | No |
| 59 | H27 | 0.87870 | 0.29930 | 0.55210 | No |
| 60 | H28 | 0.12130 | 0.70070 | 0.05210 | No |
| 61 | H29 | 0.46340 | 0.23930 | 0.64530 | No |
| 62 | H30 | 0.53660 | 0.76070 | 0.14530 | No |
| 63 | H31 | 0.96340 | 0.26070 | 0.64530 | No |
| 64 | H32 | 0.03660 | 0.73930 | 0.14530 | No |
| 65 | H33 | 0.47240 | 0.11130 | 0.38550 | No |
| 66 | H34 | 0.52760 | 0.88870 | 0.88550 | No |
| 67 | H35 | 0.97240 | 0.38870 | 0.38550 | No |
| 68 | H36 | 0.02760 | 0.61130 | 0.88550 | No |
| 69 | H37 | 0.55860 | 0.15340 | 0.46910 | No |
| 70 | H38 | 0.44140 | 0.84660 | 0.96910 | No |
| 71 | H39 | 0.05860 | 0.34660 | 0.46910 | No |
| 72 | H40 | 0.94140 | 0.65340 | 0.96910 | No |
| 73 | H41 | 0.52810 | 0.99740 | 0.55630 | No |
| 74 | H42 | 0.47190 | 0.00260 | 0.05630 | No |
| 75 | H43 | 0.02810 | 0.50260 | 0.55630 | No |
| 76 | H44 | 0.97190 | 0.49740 | 0.05630 | No |
| 77 | H45 | 0.52650 | 0.07110 | 0.69690 | No |
| 78 | H46 | 0.47350 | 0.92890 | 0.19690 | No |
| 79 | H47 | 0.02650 | 0.42890 | 0.69690 | No |
| 80 | H48 | 0.97350 | 0.57110 | 0.19690 | No |
| 81 | H49 | 0.37400 | 0.06910 | 0.70420 | No |
| 82 | H50 | 0.62600 | 0.93090 | 0.20420 | No |
| 83 | H51 | 0.87400 | 0.43090 | 0.70420 | No |
| 84 | H52 | 0.12600 | 0.56910 | 0.20420 | No |
| 85 | H53 | 0.40970 | 0.96290 | 0.71500 | No |
| 86 | H54 | 0.59030 | 0.03710 | 0.21500 | No |
| 87 | H55 | 0.90970 | 0.53710 | 0.71500 | No |
| 88 | H56 | 0.09030 | 0.46290 | 0.21500 | No |
| 89 | H57 | 0.33640 | 0.04580 | 0.44060 | No |
| 90 | H58 | 0.66360 | 0.95420 | 0.94060 | No |
| 91 | H59 | 0.83640 | 0.45420 | 0.44060 | No |
| 92 | H60 | 0.16360 | 0.54580 | 0.94060 | No |
| 93 | H61 | 0.37410 | 0.93990 | 0.44850 | No |
| 94 | H62 | 0.62590 | 0.06010 | 0.94850 | No |
| 95 | H63 | 0.87410 | 0.56010 | 0.44850 | No |

|     |     |         |         |         |    |
|-----|-----|---------|---------|---------|----|
| 96  | H64 | 0.12590 | 0.43990 | 0.94850 | No |
| 97  | H65 | 0.26160 | 0.89450 | 0.61710 | No |
| 98  | H66 | 0.73840 | 0.10550 | 0.11710 | No |
| 99  | H67 | 0.76160 | 0.60550 | 0.61710 | No |
| 100 | H68 | 0.23840 | 0.39450 | 0.11710 | No |
| 101 | H69 | 0.22810 | 0.00160 | 0.63390 | No |
| 102 | H70 | 0.77190 | 0.99840 | 0.13390 | No |
| 103 | H71 | 0.72810 | 0.49840 | 0.63390 | No |
| 104 | H72 | 0.27190 | 0.50160 | 0.13390 | No |
| 105 | C1  | 0.44190 | 0.21900 | 0.54200 | No |
| 106 | C2  | 0.55810 | 0.78100 | 0.04200 | No |
| 107 | C3  | 0.94190 | 0.28100 | 0.54200 | No |
| 108 | C4  | 0.05810 | 0.71900 | 0.04200 | No |
| 109 | C5  | 0.49640 | 0.13340 | 0.48610 | No |
| 110 | C6  | 0.50360 | 0.86660 | 0.98610 | No |
| 111 | C7  | 0.99640 | 0.36660 | 0.48610 | No |
| 112 | C8  | 0.00360 | 0.63340 | 0.98610 | No |
| 113 | C9  | 0.49500 | 0.05130 | 0.60150 | No |
| 114 | C10 | 0.50500 | 0.94870 | 0.10150 | No |
| 115 | C11 | 0.99500 | 0.44870 | 0.60150 | No |
| 116 | C12 | 0.00500 | 0.55130 | 0.10150 | No |
| 117 | C13 | 0.40380 | 0.01810 | 0.64510 | No |
| 118 | C14 | 0.59620 | 0.98190 | 0.14510 | No |
| 119 | C15 | 0.90380 | 0.48190 | 0.64510 | No |
| 120 | C16 | 0.09620 | 0.51810 | 0.14510 | No |
| 121 | C17 | 0.34450 | 0.99030 | 0.50940 | No |
| 122 | C18 | 0.65550 | 0.00970 | 0.00940 | No |
| 123 | C19 | 0.84450 | 0.50970 | 0.50940 | No |
| 124 | C20 | 0.15550 | 0.49030 | 0.00940 | No |
| 125 | C21 | 0.25450 | 0.95520 | 0.56120 | No |
| 126 | C22 | 0.74550 | 0.04480 | 0.06120 | No |
| 127 | C23 | 0.75450 | 0.54480 | 0.56120 | No |
| 128 | C24 | 0.24550 | 0.45520 | 0.06120 | No |

## Reflex Summary Report for Rietveld Refinement of $0.8[\text{C}_6\text{N}_2\text{H}_{18}]\text{BiI}_5 + 0.2[\text{C}_6\text{N}_2\text{H}_{18}]\text{SbI}_5$ :

### Lattice Parameters

Lattice Type: Triclinic Space Group: P 1

| Parameter | Value              | Refined? |
|-----------|--------------------|----------|
| a         | 15.04801 ± 0.09657 | Yes      |
| b         | 14.12300 ± 0.08967 | Yes      |
| c         | 43.08392 ± 0.28274 | Yes      |
| $\alpha$  | 90.06314 ± 0.81935 | Yes      |
| $\beta$   | 89.74369 ± 0.20146 | Yes      |
| $\gamma$  | 90.01875 ± 2.01633 | Yes      |

#### Structure Parameters

Refined Motion Groups: 0 Refined Torsions: 0

Refined Angles: 0 Refined Distances: 0

Number of Refined DOF: 0

#### Fractional Coordinates

| No. | Name | u       | v       | w       | Refined? |
|-----|------|---------|---------|---------|----------|
| 1   | C1   | 0.44190 | 0.21900 | 0.10840 | No       |
| 2   | C2   | 0.44190 | 0.21900 | 0.30840 | No       |
| 3   | C3   | 0.44190 | 0.21900 | 0.50840 | No       |
| 4   | C4   | 0.44190 | 0.21900 | 0.70840 | No       |
| 5   | C5   | 0.44190 | 0.21900 | 0.90840 | No       |
| 6   | C6   | 0.55810 | 0.78100 | 0.00840 | No       |
| 7   | C7   | 0.55810 | 0.78100 | 0.20840 | No       |
| 8   | C8   | 0.55810 | 0.78100 | 0.40840 | No       |
| 9   | C9   | 0.55810 | 0.78100 | 0.60840 | No       |
| 10  | C10  | 0.55810 | 0.78100 | 0.80840 | No       |
| 11  | C11  | 0.94190 | 0.28100 | 0.10840 | No       |
| 12  | C12  | 0.94190 | 0.28100 | 0.30840 | No       |
| 13  | C13  | 0.94190 | 0.28100 | 0.50840 | No       |
| 14  | C14  | 0.94190 | 0.28100 | 0.70840 | No       |
| 15  | C15  | 0.94190 | 0.28100 | 0.90840 | No       |
| 16  | C16  | 0.05810 | 0.71900 | 0.00840 | No       |
| 17  | C17  | 0.05810 | 0.71900 | 0.20840 | No       |
| 18  | C18  | 0.05810 | 0.71900 | 0.40840 | No       |
| 19  | C19  | 0.05810 | 0.71900 | 0.60840 | No       |
| 20  | C20  | 0.05810 | 0.71900 | 0.80840 | No       |
| 21  | C21  | 0.49640 | 0.13340 | 0.09722 | No       |
| 22  | C22  | 0.49640 | 0.13340 | 0.29722 | No       |
| 23  | C23  | 0.49640 | 0.13340 | 0.49722 | No       |
| 24  | C24  | 0.49640 | 0.13340 | 0.69722 | No       |

|    |     |         |         |         |    |
|----|-----|---------|---------|---------|----|
| 25 | C25 | 0.49640 | 0.13340 | 0.89722 | No |
| 26 | C26 | 0.50360 | 0.86660 | 0.99722 | No |
| 27 | C27 | 0.50360 | 0.86660 | 0.19722 | No |
| 28 | C28 | 0.50360 | 0.86660 | 0.39722 | No |
| 29 | C29 | 0.50360 | 0.86660 | 0.59722 | No |
| 30 | C30 | 0.50360 | 0.86660 | 0.79722 | No |
| 31 | C31 | 0.99640 | 0.36660 | 0.09722 | No |
| 32 | C32 | 0.99640 | 0.36660 | 0.29722 | No |
| 33 | C33 | 0.99640 | 0.36660 | 0.49722 | No |
| 34 | C34 | 0.99640 | 0.36660 | 0.69722 | No |
| 35 | C35 | 0.99640 | 0.36660 | 0.89722 | No |
| 36 | C36 | 0.00360 | 0.63340 | 0.99722 | No |
| 37 | C37 | 0.00360 | 0.63340 | 0.19722 | No |
| 38 | C38 | 0.00360 | 0.63340 | 0.39722 | No |
| 39 | C39 | 0.00360 | 0.63340 | 0.59722 | No |
| 40 | C40 | 0.00360 | 0.63340 | 0.79722 | No |
| 41 | C41 | 0.49500 | 0.05130 | 0.12030 | No |
| 42 | C42 | 0.49500 | 0.05130 | 0.32030 | No |
| 43 | C43 | 0.49500 | 0.05130 | 0.52030 | No |
| 44 | C44 | 0.49500 | 0.05130 | 0.72030 | No |
| 45 | C45 | 0.49500 | 0.05130 | 0.92030 | No |
| 46 | C46 | 0.50500 | 0.94870 | 0.02030 | No |
| 47 | C47 | 0.50500 | 0.94870 | 0.22030 | No |
| 48 | C48 | 0.50500 | 0.94870 | 0.42030 | No |
| 49 | C49 | 0.50500 | 0.94870 | 0.62030 | No |
| 50 | C50 | 0.50500 | 0.94870 | 0.82030 | No |
| 51 | C51 | 0.99500 | 0.44870 | 0.12030 | No |
| 52 | C52 | 0.99500 | 0.44870 | 0.32030 | No |
| 53 | C53 | 0.99500 | 0.44870 | 0.52030 | No |
| 54 | C54 | 0.99500 | 0.44870 | 0.72030 | No |
| 55 | C55 | 0.99500 | 0.44870 | 0.92030 | No |
| 56 | C56 | 0.00500 | 0.55130 | 0.02030 | No |
| 57 | C57 | 0.00500 | 0.55130 | 0.22030 | No |
| 58 | C58 | 0.00500 | 0.55130 | 0.42030 | No |
| 59 | C59 | 0.00500 | 0.55130 | 0.62030 | No |
| 60 | C60 | 0.00500 | 0.55130 | 0.82030 | No |
| 61 | C61 | 0.40380 | 0.01810 | 0.12902 | No |
| 62 | C62 | 0.40380 | 0.01810 | 0.32902 | No |

|     |      |         |         |         |    |
|-----|------|---------|---------|---------|----|
| 63  | C63  | 0.40380 | 0.01810 | 0.52902 | No |
| 64  | C64  | 0.40380 | 0.01810 | 0.72902 | No |
| 65  | C65  | 0.40380 | 0.01810 | 0.92902 | No |
| 66  | C66  | 0.59620 | 0.98190 | 0.02902 | No |
| 67  | C67  | 0.59620 | 0.98190 | 0.22902 | No |
| 68  | C68  | 0.59620 | 0.98190 | 0.42902 | No |
| 69  | C69  | 0.59620 | 0.98190 | 0.62902 | No |
| 70  | C70  | 0.59620 | 0.98190 | 0.82902 | No |
| 71  | C71  | 0.90380 | 0.48190 | 0.12902 | No |
| 72  | C72  | 0.90380 | 0.48190 | 0.32902 | No |
| 73  | C73  | 0.90380 | 0.48190 | 0.52902 | No |
| 74  | C74  | 0.90380 | 0.48190 | 0.72902 | No |
| 75  | C75  | 0.90380 | 0.48190 | 0.92902 | No |
| 76  | C76  | 0.09620 | 0.51810 | 0.02902 | No |
| 77  | C77  | 0.09620 | 0.51810 | 0.22902 | No |
| 78  | C78  | 0.09620 | 0.51810 | 0.42902 | No |
| 79  | C79  | 0.09620 | 0.51810 | 0.62902 | No |
| 80  | C80  | 0.09620 | 0.51810 | 0.82902 | No |
| 81  | C81  | 0.34450 | 0.99030 | 0.10188 | No |
| 82  | C82  | 0.34450 | 0.99030 | 0.30188 | No |
| 83  | C83  | 0.34450 | 0.99030 | 0.50188 | No |
| 84  | C84  | 0.34450 | 0.99030 | 0.70188 | No |
| 85  | C85  | 0.34450 | 0.99030 | 0.90188 | No |
| 86  | C86  | 0.65550 | 0.00970 | 0.00188 | No |
| 87  | C87  | 0.65550 | 0.00970 | 0.20188 | No |
| 88  | C88  | 0.65550 | 0.00970 | 0.40188 | No |
| 89  | C89  | 0.65550 | 0.00970 | 0.60188 | No |
| 90  | C90  | 0.65550 | 0.00970 | 0.80188 | No |
| 91  | C91  | 0.84450 | 0.50970 | 0.10188 | No |
| 92  | C92  | 0.84450 | 0.50970 | 0.30188 | No |
| 93  | C93  | 0.84450 | 0.50970 | 0.50188 | No |
| 94  | C94  | 0.84450 | 0.50970 | 0.70188 | No |
| 95  | C95  | 0.84450 | 0.50970 | 0.90188 | No |
| 96  | C96  | 0.15550 | 0.49030 | 0.00188 | No |
| 97  | C97  | 0.15550 | 0.49030 | 0.20188 | No |
| 98  | C98  | 0.15550 | 0.49030 | 0.40188 | No |
| 99  | C99  | 0.15550 | 0.49030 | 0.60188 | No |
| 100 | C100 | 0.15550 | 0.49030 | 0.80188 | No |

|     |      |         |         |         |    |
|-----|------|---------|---------|---------|----|
| 101 | C101 | 0.25450 | 0.95520 | 0.11224 | No |
| 102 | C102 | 0.25450 | 0.95520 | 0.31224 | No |
| 103 | C103 | 0.25450 | 0.95520 | 0.51224 | No |
| 104 | C104 | 0.25450 | 0.95520 | 0.71224 | No |
| 105 | C105 | 0.25450 | 0.95520 | 0.91224 | No |
| 106 | C106 | 0.74550 | 0.04480 | 0.01224 | No |
| 107 | C107 | 0.74550 | 0.04480 | 0.21224 | No |
| 108 | C108 | 0.74550 | 0.04480 | 0.41224 | No |
| 109 | C109 | 0.74550 | 0.04480 | 0.61224 | No |
| 110 | C110 | 0.74550 | 0.04480 | 0.81224 | No |
| 111 | C111 | 0.75450 | 0.54480 | 0.11224 | No |
| 112 | C112 | 0.75450 | 0.54480 | 0.31224 | No |
| 113 | C113 | 0.75450 | 0.54480 | 0.51224 | No |
| 114 | C114 | 0.75450 | 0.54480 | 0.71224 | No |
| 115 | C115 | 0.75450 | 0.54480 | 0.91224 | No |
| 116 | C116 | 0.24550 | 0.45520 | 0.01224 | No |
| 117 | C117 | 0.24550 | 0.45520 | 0.21224 | No |
| 118 | C118 | 0.24550 | 0.45520 | 0.41224 | No |
| 119 | C119 | 0.24550 | 0.45520 | 0.61224 | No |
| 120 | C120 | 0.24550 | 0.45520 | 0.81224 | No |
| 121 | I1   | 0.48458 | 0.51909 | 0.04212 | No |
| 122 | I2   | 0.48458 | 0.51909 | 0.24212 | No |
| 123 | I3   | 0.48458 | 0.51909 | 0.44212 | No |
| 124 | I4   | 0.48458 | 0.51909 | 0.64212 | No |
| 125 | I5   | 0.48458 | 0.51909 | 0.84212 | No |
| 126 | I6   | 0.51542 | 0.48091 | 0.94212 | No |
| 127 | I7   | 0.51542 | 0.48091 | 0.14212 | No |
| 128 | I8   | 0.51542 | 0.48091 | 0.34212 | No |
| 129 | I9   | 0.51542 | 0.48091 | 0.54212 | No |
| 130 | I10  | 0.51542 | 0.48091 | 0.74212 | No |
| 131 | I11  | 0.98458 | 0.98091 | 0.04212 | No |
| 132 | I12  | 0.98458 | 0.98091 | 0.24212 | No |
| 133 | I13  | 0.98458 | 0.98091 | 0.44212 | No |
| 134 | I14  | 0.98458 | 0.98091 | 0.64212 | No |
| 135 | I15  | 0.98458 | 0.98091 | 0.84212 | No |
| 136 | I16  | 0.01542 | 0.01909 | 0.94212 | No |
| 137 | I17  | 0.01542 | 0.01909 | 0.14212 | No |
| 138 | I18  | 0.01542 | 0.01909 | 0.34212 | No |



|     |     |         |         |         |    |
|-----|-----|---------|---------|---------|----|
| 139 | I19 | 0.01542 | 0.01909 | 0.54212 | No |
| 140 | I20 | 0.01542 | 0.01909 | 0.74212 | No |
| 141 | I21 | 0.25948 | 0.45560 | 0.10194 | No |
| 142 | I22 | 0.25948 | 0.45560 | 0.30194 | No |
| 143 | I23 | 0.25948 | 0.45560 | 0.50194 | No |
| 144 | I24 | 0.25948 | 0.45560 | 0.70194 | No |
| 145 | I25 | 0.25948 | 0.45560 | 0.90194 | No |
| 146 | I26 | 0.74052 | 0.54440 | 0.00194 | No |
| 147 | I27 | 0.74052 | 0.54440 | 0.20194 | No |
| 148 | I28 | 0.74052 | 0.54440 | 0.40194 | No |
| 149 | I29 | 0.74052 | 0.54440 | 0.60194 | No |
| 150 | I30 | 0.74052 | 0.54440 | 0.80194 | No |
| 151 | I31 | 0.75948 | 0.04440 | 0.10194 | No |
| 152 | I32 | 0.75948 | 0.04440 | 0.30194 | No |
| 153 | I33 | 0.75948 | 0.04440 | 0.50194 | No |
| 154 | I34 | 0.75948 | 0.04440 | 0.70194 | No |
| 155 | I35 | 0.75948 | 0.04440 | 0.90194 | No |
| 156 | I36 | 0.24052 | 0.95560 | 0.00194 | No |
| 157 | I37 | 0.24052 | 0.95560 | 0.20194 | No |
| 158 | I38 | 0.24052 | 0.95560 | 0.40194 | No |
| 159 | I39 | 0.24052 | 0.95560 | 0.60194 | No |
| 160 | I40 | 0.24052 | 0.95560 | 0.80194 | No |
| 161 | I41 | 0.29912 | 0.73228 | 0.05329 | No |
| 162 | I42 | 0.29912 | 0.73228 | 0.25329 | No |
| 163 | I43 | 0.29912 | 0.73228 | 0.45329 | No |
| 164 | I44 | 0.29912 | 0.73228 | 0.65329 | No |
| 165 | I45 | 0.29912 | 0.73228 | 0.85329 | No |
| 166 | I46 | 0.70088 | 0.26772 | 0.95329 | No |
| 167 | I47 | 0.70088 | 0.26772 | 0.15329 | No |
| 168 | I48 | 0.70088 | 0.26772 | 0.35329 | No |
| 169 | I49 | 0.70088 | 0.26772 | 0.55329 | No |
| 170 | I50 | 0.70088 | 0.26772 | 0.75329 | No |
| 171 | I51 | 0.79912 | 0.76772 | 0.05329 | No |
| 172 | I52 | 0.79912 | 0.76772 | 0.25329 | No |
| 173 | I53 | 0.79912 | 0.76772 | 0.45329 | No |
| 174 | I54 | 0.79912 | 0.76772 | 0.65329 | No |
| 175 | I55 | 0.79912 | 0.76772 | 0.85329 | No |
| 176 | I56 | 0.20088 | 0.23228 | 0.95329 | No |

|     |     |         |         |         |    |
|-----|-----|---------|---------|---------|----|
| 177 | I57 | 0.20088 | 0.23228 | 0.15329 | No |
| 178 | I58 | 0.20088 | 0.23228 | 0.35329 | No |
| 179 | I59 | 0.20088 | 0.23228 | 0.55329 | No |
| 180 | I60 | 0.20088 | 0.23228 | 0.75329 | No |
| 181 | I61 | 0.30809 | 0.69835 | 0.15768 | No |
| 182 | I62 | 0.30809 | 0.69835 | 0.35768 | No |
| 183 | I63 | 0.30809 | 0.69835 | 0.55768 | No |
| 184 | I64 | 0.30809 | 0.69835 | 0.75768 | No |
| 185 | I65 | 0.30809 | 0.69835 | 0.95768 | No |
| 186 | I66 | 0.69191 | 0.30165 | 0.05768 | No |
| 187 | I67 | 0.69191 | 0.30165 | 0.25768 | No |
| 188 | I68 | 0.69191 | 0.30165 | 0.45768 | No |
| 189 | I69 | 0.69191 | 0.30165 | 0.65768 | No |
| 190 | I70 | 0.69191 | 0.30165 | 0.85768 | No |
| 191 | I71 | 0.80809 | 0.80165 | 0.15768 | No |
| 192 | I72 | 0.80809 | 0.80165 | 0.35768 | No |
| 193 | I73 | 0.80809 | 0.80165 | 0.55768 | No |
| 194 | I74 | 0.80809 | 0.80165 | 0.75768 | No |
| 195 | I75 | 0.80809 | 0.80165 | 0.95768 | No |
| 196 | I76 | 0.19191 | 0.19835 | 0.05768 | No |
| 197 | I77 | 0.19191 | 0.19835 | 0.25768 | No |
| 198 | I78 | 0.19191 | 0.19835 | 0.45768 | No |
| 199 | I79 | 0.19191 | 0.19835 | 0.65768 | No |
| 200 | I80 | 0.19191 | 0.19835 | 0.85768 | No |
| 201 | I81 | 0.54645 | 0.76181 | 0.10427 | No |
| 202 | I82 | 0.54645 | 0.76181 | 0.30427 | No |
| 203 | I83 | 0.54645 | 0.76181 | 0.50427 | No |
| 204 | I84 | 0.54645 | 0.76181 | 0.70427 | No |
| 205 | I85 | 0.54645 | 0.76181 | 0.90427 | No |
| 206 | I86 | 0.45355 | 0.23819 | 0.00427 | No |
| 207 | I87 | 0.45355 | 0.23819 | 0.20427 | No |
| 208 | I88 | 0.45355 | 0.23819 | 0.40427 | No |
| 209 | I89 | 0.45355 | 0.23819 | 0.60427 | No |
| 210 | I90 | 0.45355 | 0.23819 | 0.80427 | No |
| 211 | I91 | 0.04645 | 0.73819 | 0.10427 | No |
| 212 | I92 | 0.04645 | 0.73819 | 0.30427 | No |
| 213 | I93 | 0.04645 | 0.73819 | 0.50427 | No |
| 214 | I94 | 0.04645 | 0.73819 | 0.70427 | No |

|     |      |         |         |         |    |
|-----|------|---------|---------|---------|----|
| 215 | I95  | 0.04645 | 0.73819 | 0.90427 | No |
| 216 | I96  | 0.95355 | 0.26181 | 0.00427 | No |
| 217 | I97  | 0.95355 | 0.26181 | 0.20427 | No |
| 218 | I98  | 0.95355 | 0.26181 | 0.40427 | No |
| 219 | I99  | 0.95355 | 0.26181 | 0.60427 | No |
| 220 | I100 | 0.95355 | 0.26181 | 0.80427 | No |
| 221 | H1   | 0.43960 | 0.27810 | 0.06640 | No |
| 222 | H2   | 0.43960 | 0.27810 | 0.26640 | No |
| 223 | H3   | 0.43960 | 0.27810 | 0.46640 | No |
| 224 | H4   | 0.43960 | 0.27810 | 0.66640 | No |
| 225 | H5   | 0.43960 | 0.27810 | 0.86640 | No |
| 226 | H6   | 0.56040 | 0.72190 | 0.96640 | No |
| 227 | H7   | 0.56040 | 0.72190 | 0.16640 | No |
| 228 | H8   | 0.56040 | 0.72190 | 0.36640 | No |
| 229 | H9   | 0.56040 | 0.72190 | 0.56640 | No |
| 230 | H10  | 0.56040 | 0.72190 | 0.76640 | No |
| 231 | H11  | 0.93960 | 0.22190 | 0.06640 | No |
| 232 | H12  | 0.93960 | 0.22190 | 0.26640 | No |
| 233 | H13  | 0.93960 | 0.22190 | 0.46640 | No |
| 234 | H14  | 0.93960 | 0.22190 | 0.66640 | No |
| 235 | H15  | 0.93960 | 0.22190 | 0.86640 | No |
| 236 | H16  | 0.06040 | 0.77810 | 0.96640 | No |
| 237 | H17  | 0.06040 | 0.77810 | 0.16640 | No |
| 238 | H18  | 0.06040 | 0.77810 | 0.36640 | No |
| 239 | H19  | 0.06040 | 0.77810 | 0.56640 | No |
| 240 | H20  | 0.06040 | 0.77810 | 0.76640 | No |
| 241 | H21  | 0.50570 | 0.32420 | 0.08704 | No |
| 242 | H22  | 0.50570 | 0.32420 | 0.28704 | No |
| 243 | H23  | 0.50570 | 0.32420 | 0.48704 | No |
| 244 | H24  | 0.50570 | 0.32420 | 0.68704 | No |
| 245 | H25  | 0.50570 | 0.32420 | 0.88704 | No |
| 246 | H26  | 0.49430 | 0.67580 | 0.98704 | No |
| 247 | H27  | 0.49430 | 0.67580 | 0.18704 | No |
| 248 | H28  | 0.49430 | 0.67580 | 0.38704 | No |
| 249 | H29  | 0.49430 | 0.67580 | 0.58704 | No |
| 250 | H30  | 0.49430 | 0.67580 | 0.78704 | No |
| 251 | H31  | 0.00570 | 0.17580 | 0.08704 | No |
| 252 | H32  | 0.00570 | 0.17580 | 0.28704 | No |

|     |     |         |         |         |    |
|-----|-----|---------|---------|---------|----|
| 253 | H33 | 0.00570 | 0.17580 | 0.48704 | No |
| 254 | H34 | 0.00570 | 0.17580 | 0.68704 | No |
| 255 | H35 | 0.00570 | 0.17580 | 0.88704 | No |
| 256 | H36 | 0.99430 | 0.82420 | 0.98704 | No |
| 257 | H37 | 0.99430 | 0.82420 | 0.18704 | No |
| 258 | H38 | 0.99430 | 0.82420 | 0.38704 | No |
| 259 | H39 | 0.99430 | 0.82420 | 0.58704 | No |
| 260 | H40 | 0.99430 | 0.82420 | 0.78704 | No |
| 261 | H41 | 0.40970 | 0.34510 | 0.09086 | No |
| 262 | H42 | 0.40970 | 0.34510 | 0.29086 | No |
| 263 | H43 | 0.40970 | 0.34510 | 0.49086 | No |
| 264 | H44 | 0.40970 | 0.34510 | 0.69086 | No |
| 265 | H45 | 0.40970 | 0.34510 | 0.89086 | No |
| 266 | H46 | 0.59030 | 0.65490 | 0.99086 | No |
| 267 | H47 | 0.59030 | 0.65490 | 0.19086 | No |
| 268 | H48 | 0.59030 | 0.65490 | 0.39086 | No |
| 269 | H49 | 0.59030 | 0.65490 | 0.59086 | No |
| 270 | H50 | 0.59030 | 0.65490 | 0.79086 | No |
| 271 | H51 | 0.90970 | 0.15490 | 0.09086 | No |
| 272 | H52 | 0.90970 | 0.15490 | 0.29086 | No |
| 273 | H53 | 0.90970 | 0.15490 | 0.49086 | No |
| 274 | H54 | 0.90970 | 0.15490 | 0.69086 | No |
| 275 | H55 | 0.90970 | 0.15490 | 0.89086 | No |
| 276 | H56 | 0.09030 | 0.84510 | 0.99086 | No |
| 277 | H57 | 0.09030 | 0.84510 | 0.19086 | No |
| 278 | H58 | 0.09030 | 0.84510 | 0.39086 | No |
| 279 | H59 | 0.09030 | 0.84510 | 0.59086 | No |
| 280 | H60 | 0.09030 | 0.84510 | 0.79086 | No |
| 281 | H61 | 0.22060 | 0.90500 | 0.07076 | No |
| 282 | H62 | 0.22060 | 0.90500 | 0.27076 | No |
| 283 | H63 | 0.22060 | 0.90500 | 0.47076 | No |
| 284 | H64 | 0.22060 | 0.90500 | 0.67076 | No |
| 285 | H65 | 0.22060 | 0.90500 | 0.87076 | No |
| 286 | H66 | 0.77940 | 0.09500 | 0.97076 | No |
| 287 | H67 | 0.77940 | 0.09500 | 0.17076 | No |
| 288 | H68 | 0.77940 | 0.09500 | 0.37076 | No |
| 289 | H69 | 0.77940 | 0.09500 | 0.57076 | No |
| 290 | H70 | 0.77940 | 0.09500 | 0.77076 | No |

|     |      |         |         |         |    |
|-----|------|---------|---------|---------|----|
| 291 | H71  | 0.72060 | 0.59500 | 0.07076 | No |
| 292 | H72  | 0.72060 | 0.59500 | 0.27076 | No |
| 293 | H73  | 0.72060 | 0.59500 | 0.47076 | No |
| 294 | H74  | 0.72060 | 0.59500 | 0.67076 | No |
| 295 | H75  | 0.72060 | 0.59500 | 0.87076 | No |
| 296 | H76  | 0.27940 | 0.40500 | 0.97076 | No |
| 297 | H77  | 0.27940 | 0.40500 | 0.17076 | No |
| 298 | H78  | 0.27940 | 0.40500 | 0.37076 | No |
| 299 | H79  | 0.27940 | 0.40500 | 0.57076 | No |
| 300 | H80  | 0.27940 | 0.40500 | 0.77076 | No |
| 301 | H81  | 0.17940 | 0.99870 | 0.07702 | No |
| 302 | H82  | 0.17940 | 0.99870 | 0.27702 | No |
| 303 | H83  | 0.17940 | 0.99870 | 0.47702 | No |
| 304 | H84  | 0.17940 | 0.99870 | 0.67702 | No |
| 305 | H85  | 0.17940 | 0.99870 | 0.87702 | No |
| 306 | H86  | 0.82060 | 0.00130 | 0.97702 | No |
| 307 | H87  | 0.82060 | 0.00130 | 0.17702 | No |
| 308 | H88  | 0.82060 | 0.00130 | 0.37702 | No |
| 309 | H89  | 0.82060 | 0.00130 | 0.57702 | No |
| 310 | H90  | 0.82060 | 0.00130 | 0.77702 | No |
| 311 | H91  | 0.67940 | 0.50130 | 0.07702 | No |
| 312 | H92  | 0.67940 | 0.50130 | 0.27702 | No |
| 313 | H93  | 0.67940 | 0.50130 | 0.47702 | No |
| 314 | H94  | 0.67940 | 0.50130 | 0.67702 | No |
| 315 | H95  | 0.67940 | 0.50130 | 0.87702 | No |
| 316 | H96  | 0.32060 | 0.49870 | 0.97702 | No |
| 317 | H97  | 0.32060 | 0.49870 | 0.17702 | No |
| 318 | H98  | 0.32060 | 0.49870 | 0.37702 | No |
| 319 | H99  | 0.32060 | 0.49870 | 0.57702 | No |
| 320 | H100 | 0.32060 | 0.49870 | 0.77702 | No |
| 321 | H101 | 0.14300 | 0.91200 | 0.09190 | No |
| 322 | H102 | 0.14300 | 0.91200 | 0.29190 | No |
| 323 | H103 | 0.14300 | 0.91200 | 0.49190 | No |
| 324 | H104 | 0.14300 | 0.91200 | 0.69190 | No |
| 325 | H105 | 0.14300 | 0.91200 | 0.89190 | No |
| 326 | H106 | 0.85700 | 0.08800 | 0.99190 | No |
| 327 | H107 | 0.85700 | 0.08800 | 0.19190 | No |
| 328 | H108 | 0.85700 | 0.08800 | 0.39190 | No |

|     |      |         |         |         |    |
|-----|------|---------|---------|---------|----|
| 329 | H109 | 0.85700 | 0.08800 | 0.59190 | No |
| 330 | H110 | 0.85700 | 0.08800 | 0.79190 | No |
| 331 | H111 | 0.64300 | 0.58800 | 0.09190 | No |
| 332 | H112 | 0.64300 | 0.58800 | 0.29190 | No |
| 333 | H113 | 0.64300 | 0.58800 | 0.49190 | No |
| 334 | H114 | 0.64300 | 0.58800 | 0.69190 | No |
| 335 | H115 | 0.64300 | 0.58800 | 0.89190 | No |
| 336 | H116 | 0.35700 | 0.41200 | 0.99190 | No |
| 337 | H117 | 0.35700 | 0.41200 | 0.19190 | No |
| 338 | H118 | 0.35700 | 0.41200 | 0.39190 | No |
| 339 | H119 | 0.35700 | 0.41200 | 0.59190 | No |
| 340 | H120 | 0.35700 | 0.41200 | 0.79190 | No |
| 341 | H121 | 0.37870 | 0.20070 | 0.11042 | No |
| 342 | H122 | 0.37870 | 0.20070 | 0.31042 | No |
| 343 | H123 | 0.37870 | 0.20070 | 0.51042 | No |
| 344 | H124 | 0.37870 | 0.20070 | 0.71042 | No |
| 345 | H125 | 0.37870 | 0.20070 | 0.91042 | No |
| 346 | H126 | 0.62130 | 0.79930 | 0.01042 | No |
| 347 | H127 | 0.62130 | 0.79930 | 0.21042 | No |
| 348 | H128 | 0.62130 | 0.79930 | 0.41042 | No |
| 349 | H129 | 0.62130 | 0.79930 | 0.61042 | No |
| 350 | H130 | 0.62130 | 0.79930 | 0.81042 | No |
| 351 | H131 | 0.87870 | 0.29930 | 0.11042 | No |
| 352 | H132 | 0.87870 | 0.29930 | 0.31042 | No |
| 353 | H133 | 0.87870 | 0.29930 | 0.51042 | No |
| 354 | H134 | 0.87870 | 0.29930 | 0.71042 | No |
| 355 | H135 | 0.87870 | 0.29930 | 0.91042 | No |
| 356 | H136 | 0.12130 | 0.70070 | 0.01042 | No |
| 357 | H137 | 0.12130 | 0.70070 | 0.21042 | No |
| 358 | H138 | 0.12130 | 0.70070 | 0.41042 | No |
| 359 | H139 | 0.12130 | 0.70070 | 0.61042 | No |
| 360 | H140 | 0.12130 | 0.70070 | 0.81042 | No |
| 361 | H141 | 0.46340 | 0.23930 | 0.12906 | No |
| 362 | H142 | 0.46340 | 0.23930 | 0.32906 | No |
| 363 | H143 | 0.46340 | 0.23930 | 0.52906 | No |
| 364 | H144 | 0.46340 | 0.23930 | 0.72906 | No |
| 365 | H145 | 0.46340 | 0.23930 | 0.92906 | No |
| 366 | H146 | 0.53660 | 0.76070 | 0.02906 | No |

|     |      |         |         |         |    |
|-----|------|---------|---------|---------|----|
| 367 | H147 | 0.53660 | 0.76070 | 0.22906 | No |
| 368 | H148 | 0.53660 | 0.76070 | 0.42906 | No |
| 369 | H149 | 0.53660 | 0.76070 | 0.62906 | No |
| 370 | H150 | 0.53660 | 0.76070 | 0.82906 | No |
| 371 | H151 | 0.96340 | 0.26070 | 0.12906 | No |
| 372 | H152 | 0.96340 | 0.26070 | 0.32906 | No |
| 373 | H153 | 0.96340 | 0.26070 | 0.52906 | No |
| 374 | H154 | 0.96340 | 0.26070 | 0.72906 | No |
| 375 | H155 | 0.96340 | 0.26070 | 0.92906 | No |
| 376 | H156 | 0.03660 | 0.73930 | 0.02906 | No |
| 377 | H157 | 0.03660 | 0.73930 | 0.22906 | No |
| 378 | H158 | 0.03660 | 0.73930 | 0.42906 | No |
| 379 | H159 | 0.03660 | 0.73930 | 0.62906 | No |
| 380 | H160 | 0.03660 | 0.73930 | 0.82906 | No |
| 381 | H161 | 0.47240 | 0.11130 | 0.07710 | No |
| 382 | H162 | 0.47240 | 0.11130 | 0.27710 | No |
| 383 | H163 | 0.47240 | 0.11130 | 0.47710 | No |
| 384 | H164 | 0.47240 | 0.11130 | 0.67710 | No |
| 385 | H165 | 0.47240 | 0.11130 | 0.87710 | No |
| 386 | H166 | 0.52760 | 0.88870 | 0.97710 | No |
| 387 | H167 | 0.52760 | 0.88870 | 0.17710 | No |
| 388 | H168 | 0.52760 | 0.88870 | 0.37710 | No |
| 389 | H169 | 0.52760 | 0.88870 | 0.57710 | No |
| 390 | H170 | 0.52760 | 0.88870 | 0.77710 | No |
| 391 | H171 | 0.97240 | 0.38870 | 0.07710 | No |
| 392 | H172 | 0.97240 | 0.38870 | 0.27710 | No |
| 393 | H173 | 0.97240 | 0.38870 | 0.47710 | No |
| 394 | H174 | 0.97240 | 0.38870 | 0.67710 | No |
| 395 | H175 | 0.97240 | 0.38870 | 0.87710 | No |
| 396 | H176 | 0.02760 | 0.61130 | 0.97710 | No |
| 397 | H177 | 0.02760 | 0.61130 | 0.17710 | No |
| 398 | H178 | 0.02760 | 0.61130 | 0.37710 | No |
| 399 | H179 | 0.02760 | 0.61130 | 0.57710 | No |
| 400 | H180 | 0.02760 | 0.61130 | 0.77710 | No |
| 401 | H181 | 0.55860 | 0.15340 | 0.09382 | No |
| 402 | H182 | 0.55860 | 0.15340 | 0.29382 | No |
| 403 | H183 | 0.55860 | 0.15340 | 0.49382 | No |
| 404 | H184 | 0.55860 | 0.15340 | 0.69382 | No |

|     |      |         |         |         |    |
|-----|------|---------|---------|---------|----|
| 405 | H185 | 0.55860 | 0.15340 | 0.89382 | No |
| 406 | H186 | 0.44140 | 0.84660 | 0.99382 | No |
| 407 | H187 | 0.44140 | 0.84660 | 0.19382 | No |
| 408 | H188 | 0.44140 | 0.84660 | 0.39382 | No |
| 409 | H189 | 0.44140 | 0.84660 | 0.59382 | No |
| 410 | H190 | 0.44140 | 0.84660 | 0.79382 | No |
| 411 | H191 | 0.05860 | 0.34660 | 0.09382 | No |
| 412 | H192 | 0.05860 | 0.34660 | 0.29382 | No |
| 413 | H193 | 0.05860 | 0.34660 | 0.49382 | No |
| 414 | H194 | 0.05860 | 0.34660 | 0.69382 | No |
| 415 | H195 | 0.05860 | 0.34660 | 0.89382 | No |
| 416 | H196 | 0.94140 | 0.65340 | 0.99382 | No |
| 417 | H197 | 0.94140 | 0.65340 | 0.19382 | No |
| 418 | H198 | 0.94140 | 0.65340 | 0.39382 | No |
| 419 | H199 | 0.94140 | 0.65340 | 0.59382 | No |
| 420 | H200 | 0.94140 | 0.65340 | 0.79382 | No |
| 421 | H201 | 0.52810 | 0.99740 | 0.11126 | No |
| 422 | H202 | 0.52810 | 0.99740 | 0.31126 | No |
| 423 | H203 | 0.52810 | 0.99740 | 0.51126 | No |
| 424 | H204 | 0.52810 | 0.99740 | 0.71126 | No |
| 425 | H205 | 0.52810 | 0.99740 | 0.91126 | No |
| 426 | H206 | 0.47190 | 0.00260 | 0.01126 | No |
| 427 | H207 | 0.47190 | 0.00260 | 0.21126 | No |
| 428 | H208 | 0.47190 | 0.00260 | 0.41126 | No |
| 429 | H209 | 0.47190 | 0.00260 | 0.61126 | No |
| 430 | H210 | 0.47190 | 0.00260 | 0.81126 | No |
| 431 | H211 | 0.02810 | 0.50260 | 0.11126 | No |
| 432 | H212 | 0.02810 | 0.50260 | 0.31126 | No |
| 433 | H213 | 0.02810 | 0.50260 | 0.51126 | No |
| 434 | H214 | 0.02810 | 0.50260 | 0.71126 | No |
| 435 | H215 | 0.02810 | 0.50260 | 0.91126 | No |
| 436 | H216 | 0.97190 | 0.49740 | 0.01126 | No |
| 437 | H217 | 0.97190 | 0.49740 | 0.21126 | No |
| 438 | H218 | 0.97190 | 0.49740 | 0.41126 | No |
| 439 | H219 | 0.97190 | 0.49740 | 0.61126 | No |
| 440 | H220 | 0.97190 | 0.49740 | 0.81126 | No |
| 441 | H221 | 0.52650 | 0.07110 | 0.13938 | No |
| 442 | H222 | 0.52650 | 0.07110 | 0.33938 | No |



|     |      |         |         |         |    |
|-----|------|---------|---------|---------|----|
| 443 | H223 | 0.52650 | 0.07110 | 0.53938 | No |
| 444 | H224 | 0.52650 | 0.07110 | 0.73938 | No |
| 445 | H225 | 0.52650 | 0.07110 | 0.93938 | No |
| 446 | H226 | 0.47350 | 0.92890 | 0.03938 | No |
| 447 | H227 | 0.47350 | 0.92890 | 0.23938 | No |
| 448 | H228 | 0.47350 | 0.92890 | 0.43938 | No |
| 449 | H229 | 0.47350 | 0.92890 | 0.63938 | No |
| 450 | H230 | 0.47350 | 0.92890 | 0.83938 | No |
| 451 | H231 | 0.02650 | 0.42890 | 0.13938 | No |
| 452 | H232 | 0.02650 | 0.42890 | 0.33938 | No |
| 453 | H233 | 0.02650 | 0.42890 | 0.53938 | No |
| 454 | H234 | 0.02650 | 0.42890 | 0.73938 | No |
| 455 | H235 | 0.02650 | 0.42890 | 0.93938 | No |
| 456 | H236 | 0.97350 | 0.57110 | 0.03938 | No |
| 457 | H237 | 0.97350 | 0.57110 | 0.23938 | No |
| 458 | H238 | 0.97350 | 0.57110 | 0.43938 | No |
| 459 | H239 | 0.97350 | 0.57110 | 0.63938 | No |
| 460 | H240 | 0.97350 | 0.57110 | 0.83938 | No |
| 461 | H241 | 0.37400 | 0.06910 | 0.14084 | No |
| 462 | H242 | 0.37400 | 0.06910 | 0.34084 | No |
| 463 | H243 | 0.37400 | 0.06910 | 0.54084 | No |
| 464 | H244 | 0.37400 | 0.06910 | 0.74084 | No |
| 465 | H245 | 0.37400 | 0.06910 | 0.94084 | No |
| 466 | H246 | 0.62600 | 0.93090 | 0.04084 | No |
| 467 | H247 | 0.62600 | 0.93090 | 0.24084 | No |
| 468 | H248 | 0.62600 | 0.93090 | 0.44084 | No |
| 469 | H249 | 0.62600 | 0.93090 | 0.64084 | No |
| 470 | H250 | 0.62600 | 0.93090 | 0.84084 | No |
| 471 | H251 | 0.87400 | 0.43090 | 0.14084 | No |
| 472 | H252 | 0.87400 | 0.43090 | 0.34084 | No |
| 473 | H253 | 0.87400 | 0.43090 | 0.54084 | No |
| 474 | H254 | 0.87400 | 0.43090 | 0.74084 | No |
| 475 | H255 | 0.87400 | 0.43090 | 0.94084 | No |
| 476 | H256 | 0.12600 | 0.56910 | 0.04084 | No |
| 477 | H257 | 0.12600 | 0.56910 | 0.24084 | No |
| 478 | H258 | 0.12600 | 0.56910 | 0.44084 | No |
| 479 | H259 | 0.12600 | 0.56910 | 0.64084 | No |
| 480 | H260 | 0.12600 | 0.56910 | 0.84084 | No |

|     |      |         |         |         |    |
|-----|------|---------|---------|---------|----|
| 481 | H261 | 0.40970 | 0.96290 | 0.14300 | No |
| 482 | H262 | 0.40970 | 0.96290 | 0.34300 | No |
| 483 | H263 | 0.40970 | 0.96290 | 0.54300 | No |
| 484 | H264 | 0.40970 | 0.96290 | 0.74300 | No |
| 485 | H265 | 0.40970 | 0.96290 | 0.94300 | No |
| 486 | H266 | 0.59030 | 0.03710 | 0.04300 | No |
| 487 | H267 | 0.59030 | 0.03710 | 0.24300 | No |
| 488 | H268 | 0.59030 | 0.03710 | 0.44300 | No |
| 489 | H269 | 0.59030 | 0.03710 | 0.64300 | No |
| 490 | H270 | 0.59030 | 0.03710 | 0.84300 | No |
| 491 | H271 | 0.90970 | 0.53710 | 0.14300 | No |
| 492 | H272 | 0.90970 | 0.53710 | 0.34300 | No |
| 493 | H273 | 0.90970 | 0.53710 | 0.54300 | No |
| 494 | H274 | 0.90970 | 0.53710 | 0.74300 | No |
| 495 | H275 | 0.90970 | 0.53710 | 0.94300 | No |
| 496 | H276 | 0.09030 | 0.46290 | 0.04300 | No |
| 497 | H277 | 0.09030 | 0.46290 | 0.24300 | No |
| 498 | H278 | 0.09030 | 0.46290 | 0.44300 | No |
| 499 | H279 | 0.09030 | 0.46290 | 0.64300 | No |
| 500 | H280 | 0.09030 | 0.46290 | 0.84300 | No |
| 501 | H281 | 0.33640 | 0.04580 | 0.08812 | No |
| 502 | H282 | 0.33640 | 0.04580 | 0.28812 | No |
| 503 | H283 | 0.33640 | 0.04580 | 0.48812 | No |
| 504 | H284 | 0.33640 | 0.04580 | 0.68812 | No |
| 505 | H285 | 0.33640 | 0.04580 | 0.88812 | No |
| 506 | H286 | 0.66360 | 0.95420 | 0.98812 | No |
| 507 | H287 | 0.66360 | 0.95420 | 0.18812 | No |
| 508 | H288 | 0.66360 | 0.95420 | 0.38812 | No |
| 509 | H289 | 0.66360 | 0.95420 | 0.58812 | No |
| 510 | H290 | 0.66360 | 0.95420 | 0.78812 | No |
| 511 | H291 | 0.83640 | 0.45420 | 0.08812 | No |
| 512 | H292 | 0.83640 | 0.45420 | 0.28812 | No |
| 513 | H293 | 0.83640 | 0.45420 | 0.48812 | No |
| 514 | H294 | 0.83640 | 0.45420 | 0.68812 | No |
| 515 | H295 | 0.83640 | 0.45420 | 0.88812 | No |
| 516 | H296 | 0.16360 | 0.54580 | 0.98812 | No |
| 517 | H297 | 0.16360 | 0.54580 | 0.18812 | No |
| 518 | H298 | 0.16360 | 0.54580 | 0.38812 | No |

|     |      |         |         |         |    |
|-----|------|---------|---------|---------|----|
| 519 | H299 | 0.16360 | 0.54580 | 0.58812 | No |
| 520 | H300 | 0.16360 | 0.54580 | 0.78812 | No |
| 521 | H301 | 0.37410 | 0.93990 | 0.08970 | No |
| 522 | H302 | 0.37410 | 0.93990 | 0.28970 | No |
| 523 | H303 | 0.37410 | 0.93990 | 0.48970 | No |
| 524 | H304 | 0.37410 | 0.93990 | 0.68970 | No |
| 525 | H305 | 0.37410 | 0.93990 | 0.88970 | No |
| 526 | H306 | 0.62590 | 0.06010 | 0.98970 | No |
| 527 | H307 | 0.62590 | 0.06010 | 0.18970 | No |
| 528 | H308 | 0.62590 | 0.06010 | 0.38970 | No |
| 529 | H309 | 0.62590 | 0.06010 | 0.58970 | No |
| 530 | H310 | 0.62590 | 0.06010 | 0.78970 | No |
| 531 | H311 | 0.87410 | 0.56010 | 0.08970 | No |
| 532 | H312 | 0.87410 | 0.56010 | 0.28970 | No |
| 533 | H313 | 0.87410 | 0.56010 | 0.48970 | No |
| 534 | H314 | 0.87410 | 0.56010 | 0.68970 | No |
| 535 | H315 | 0.87410 | 0.56010 | 0.88970 | No |
| 536 | H316 | 0.12590 | 0.43990 | 0.98970 | No |
| 537 | H317 | 0.12590 | 0.43990 | 0.18970 | No |
| 538 | H318 | 0.12590 | 0.43990 | 0.38970 | No |
| 539 | H319 | 0.12590 | 0.43990 | 0.58970 | No |
| 540 | H320 | 0.12590 | 0.43990 | 0.78970 | No |
| 541 | H321 | 0.26160 | 0.89450 | 0.12342 | No |
| 542 | H322 | 0.26160 | 0.89450 | 0.32342 | No |
| 543 | H323 | 0.26160 | 0.89450 | 0.52342 | No |
| 544 | H324 | 0.26160 | 0.89450 | 0.72342 | No |
| 545 | H325 | 0.26160 | 0.89450 | 0.92342 | No |
| 546 | H326 | 0.73840 | 0.10550 | 0.02342 | No |
| 547 | H327 | 0.73840 | 0.10550 | 0.22342 | No |
| 548 | H328 | 0.73840 | 0.10550 | 0.42342 | No |
| 549 | H329 | 0.73840 | 0.10550 | 0.62342 | No |
| 550 | H330 | 0.73840 | 0.10550 | 0.82342 | No |
| 551 | H331 | 0.76160 | 0.60550 | 0.12342 | No |
| 552 | H332 | 0.76160 | 0.60550 | 0.32342 | No |
| 553 | H333 | 0.76160 | 0.60550 | 0.52342 | No |
| 554 | H334 | 0.76160 | 0.60550 | 0.72342 | No |
| 555 | H335 | 0.76160 | 0.60550 | 0.92342 | No |
| 556 | H336 | 0.23840 | 0.39450 | 0.02342 | No |

|     |      |         |         |         |    |
|-----|------|---------|---------|---------|----|
| 557 | H337 | 0.23840 | 0.39450 | 0.22342 | No |
| 558 | H338 | 0.23840 | 0.39450 | 0.42342 | No |
| 559 | H339 | 0.23840 | 0.39450 | 0.62342 | No |
| 560 | H340 | 0.23840 | 0.39450 | 0.82342 | No |
| 561 | H341 | 0.22810 | 0.00160 | 0.12678 | No |
| 562 | H342 | 0.22810 | 0.00160 | 0.32678 | No |
| 563 | H343 | 0.22810 | 0.00160 | 0.52678 | No |
| 564 | H344 | 0.22810 | 0.00160 | 0.72678 | No |
| 565 | H345 | 0.22810 | 0.00160 | 0.92678 | No |
| 566 | H346 | 0.77190 | 0.99840 | 0.02678 | No |
| 567 | H347 | 0.77190 | 0.99840 | 0.22678 | No |
| 568 | H348 | 0.77190 | 0.99840 | 0.42678 | No |
| 569 | H349 | 0.77190 | 0.99840 | 0.62678 | No |
| 570 | H350 | 0.77190 | 0.99840 | 0.82678 | No |
| 571 | H351 | 0.72810 | 0.49840 | 0.12678 | No |
| 572 | H352 | 0.72810 | 0.49840 | 0.32678 | No |
| 573 | H353 | 0.72810 | 0.49840 | 0.52678 | No |
| 574 | H354 | 0.72810 | 0.49840 | 0.72678 | No |
| 575 | H355 | 0.72810 | 0.49840 | 0.92678 | No |
| 576 | H356 | 0.27190 | 0.50160 | 0.02678 | No |
| 577 | H357 | 0.27190 | 0.50160 | 0.22678 | No |
| 578 | H358 | 0.27190 | 0.50160 | 0.42678 | No |
| 579 | H359 | 0.27190 | 0.50160 | 0.62678 | No |
| 580 | H360 | 0.27190 | 0.50160 | 0.82678 | No |
| 581 | Bi1  | 0.38917 | 0.62103 | 0.10063 | No |
| 582 | Bi2  | 0.38917 | 0.62103 | 0.30063 | No |
| 583 | Bi3  | 0.38917 | 0.62103 | 0.50063 | No |
| 584 | Bi4  | 0.38917 | 0.62103 | 0.70063 | No |
| 585 | Bi5  | 0.38917 | 0.62103 | 0.90063 | No |
| 586 | Bi6  | 0.61083 | 0.37897 | 0.00063 | No |
| 587 | Bi7  | 0.61083 | 0.37897 | 0.40063 | No |
| 588 | Bi8  | 0.61083 | 0.37897 | 0.60063 | No |
| 589 | Bi9  | 0.88917 | 0.87897 | 0.30063 | No |
| 590 | Bi10 | 0.88917 | 0.87897 | 0.50063 | No |
| 591 | Bi11 | 0.88917 | 0.87897 | 0.70063 | No |
| 592 | Bi12 | 0.88917 | 0.87897 | 0.90063 | No |
| 593 | Bi13 | 0.11083 | 0.12103 | 0.20063 | No |
| 594 | Bi14 | 0.11083 | 0.12103 | 0.40063 | No |

|     |      |         |         |         |    |
|-----|------|---------|---------|---------|----|
| 595 | Bi15 | 0.11083 | 0.12103 | 0.60063 | No |
| 596 | Bi16 | 0.11083 | 0.12103 | 0.80063 | No |
| 597 | N1   | 0.45000 | 0.29950 | 0.08598 | No |
| 598 | N2   | 0.45000 | 0.29950 | 0.28598 | No |
| 599 | N3   | 0.45000 | 0.29950 | 0.48598 | No |
| 600 | N4   | 0.45000 | 0.29950 | 0.68598 | No |
| 601 | N5   | 0.45000 | 0.29950 | 0.88598 | No |
| 602 | N6   | 0.55000 | 0.70050 | 0.98598 | No |
| 603 | N7   | 0.55000 | 0.70050 | 0.18598 | No |
| 604 | N8   | 0.55000 | 0.70050 | 0.38598 | No |
| 605 | N9   | 0.55000 | 0.70050 | 0.58598 | No |
| 606 | N10  | 0.55000 | 0.70050 | 0.78598 | No |
| 607 | N11  | 0.95000 | 0.20050 | 0.08598 | No |
| 608 | N12  | 0.95000 | 0.20050 | 0.28598 | No |
| 609 | N13  | 0.95000 | 0.20050 | 0.48598 | No |
| 610 | N14  | 0.95000 | 0.20050 | 0.68598 | No |
| 611 | N15  | 0.95000 | 0.20050 | 0.88598 | No |
| 612 | N16  | 0.05000 | 0.79950 | 0.98598 | No |
| 613 | N17  | 0.05000 | 0.79950 | 0.18598 | No |
| 614 | N18  | 0.05000 | 0.79950 | 0.38598 | No |
| 615 | N19  | 0.05000 | 0.79950 | 0.58598 | No |
| 616 | N20  | 0.05000 | 0.79950 | 0.78598 | No |
| 617 | N21  | 0.19340 | 0.94140 | 0.08536 | No |
| 618 | N22  | 0.19340 | 0.94140 | 0.28536 | No |
| 619 | N23  | 0.19340 | 0.94140 | 0.48536 | No |
| 620 | N24  | 0.19340 | 0.94140 | 0.68536 | No |
| 621 | N25  | 0.19340 | 0.94140 | 0.88536 | No |
| 622 | N26  | 0.80660 | 0.05860 | 0.98536 | No |
| 623 | N27  | 0.80660 | 0.05860 | 0.18536 | No |
| 624 | N28  | 0.80660 | 0.05860 | 0.38536 | No |
| 625 | N29  | 0.80660 | 0.05860 | 0.58536 | No |
| 626 | N30  | 0.80660 | 0.05860 | 0.78536 | No |
| 627 | N31  | 0.69340 | 0.55860 | 0.08536 | No |
| 628 | N32  | 0.69340 | 0.55860 | 0.28536 | No |
| 629 | N33  | 0.69340 | 0.55860 | 0.48536 | No |
| 630 | N34  | 0.69340 | 0.55860 | 0.68536 | No |
| 631 | N35  | 0.69340 | 0.55860 | 0.88536 | No |
| 632 | N36  | 0.30660 | 0.44140 | 0.98536 | No |

|     |     |         |         |         |    |
|-----|-----|---------|---------|---------|----|
| 633 | N37 | 0.30660 | 0.44140 | 0.18536 | No |
| 634 | N38 | 0.30660 | 0.44140 | 0.38536 | No |
| 635 | N39 | 0.30660 | 0.44140 | 0.58536 | No |
| 636 | N40 | 0.30660 | 0.44140 | 0.78536 | No |
| 637 | Sb1 | 0.61083 | 0.37897 | 0.20063 | No |
| 638 | Sb2 | 0.61083 | 0.37897 | 0.80063 | No |
| 639 | Sb3 | 0.88917 | 0.87897 | 0.10063 | No |
| 640 | Sb4 | 0.11083 | 0.12103 | 0.00063 | No |

## Reflex Summary Report for Rietveld Refinement of 0.6[C<sub>6</sub>N<sub>2</sub>H<sub>18</sub>]BiI<sub>5</sub>+0.4[C<sub>6</sub>N<sub>2</sub>H<sub>18</sub>]SbI<sub>5</sub>:

### Lattice Parameters

Lattice Type: Triclinic Space Group: P 1

| Parameter | Value              | Refined? |
|-----------|--------------------|----------|
| a         | 15.06429 ± 0.21994 | Yes      |
| b         | 14.10948 ± 0.20620 | Yes      |
| c         | 43.10452 ± 0.64775 | Yes      |
| α         | 89.87726 ± 0.88933 | Yes      |
| β         | 90.24297 ± 0.46325 | Yes      |
| γ         | 89.99018 ± 3.11252 | Yes      |

### Structure Parameters

Refined Motion Groups: 0
Refined Torsions: 0

Refined Angles: 0
Refined Distances: 0

Number of Refined DOF: 0

### Fractional Coordinates

| No. | Name | u       | v       | w       | Refined? |
|-----|------|---------|---------|---------|----------|
| 1   | C1   | 0.44190 | 0.21900 | 0.10840 | No       |
| 2   | C2   | 0.44190 | 0.21900 | 0.30840 | No       |
| 3   | C3   | 0.44190 | 0.21900 | 0.50840 | No       |
| 4   | C4   | 0.44190 | 0.21900 | 0.70840 | No       |
| 5   | C5   | 0.44190 | 0.21900 | 0.90840 | No       |
| 6   | C6   | 0.55810 | 0.78100 | 0.00840 | No       |
| 7   | C7   | 0.55810 | 0.78100 | 0.20840 | No       |
| 8   | C8   | 0.55810 | 0.78100 | 0.40840 | No       |
| 9   | C9   | 0.55810 | 0.78100 | 0.60840 | No       |
| 10  | C10  | 0.55810 | 0.78100 | 0.80840 | No       |
| 11  | C11  | 0.94190 | 0.28100 | 0.10840 | No       |
| 12  | C12  | 0.94190 | 0.28100 | 0.30840 | No       |

|    |     |         |         |         |    |
|----|-----|---------|---------|---------|----|
| 13 | C13 | 0.94190 | 0.28100 | 0.50840 | No |
| 14 | C14 | 0.94190 | 0.28100 | 0.70840 | No |
| 15 | C15 | 0.94190 | 0.28100 | 0.90840 | No |
| 16 | C16 | 0.05810 | 0.71900 | 0.00840 | No |
| 17 | C17 | 0.05810 | 0.71900 | 0.20840 | No |
| 18 | C18 | 0.05810 | 0.71900 | 0.40840 | No |
| 19 | C19 | 0.05810 | 0.71900 | 0.60840 | No |
| 20 | C20 | 0.05810 | 0.71900 | 0.80840 | No |
| 21 | C21 | 0.49640 | 0.13340 | 0.09722 | No |
| 22 | C22 | 0.49640 | 0.13340 | 0.29722 | No |
| 23 | C23 | 0.49640 | 0.13340 | 0.49722 | No |
| 24 | C24 | 0.49640 | 0.13340 | 0.69722 | No |
| 25 | C25 | 0.49640 | 0.13340 | 0.89722 | No |
| 26 | C26 | 0.50360 | 0.86660 | 0.99722 | No |
| 27 | C27 | 0.50360 | 0.86660 | 0.19722 | No |
| 28 | C28 | 0.50360 | 0.86660 | 0.39722 | No |
| 29 | C29 | 0.50360 | 0.86660 | 0.59722 | No |
| 30 | C30 | 0.50360 | 0.86660 | 0.79722 | No |
| 31 | C31 | 0.99640 | 0.36660 | 0.09722 | No |
| 32 | C32 | 0.99640 | 0.36660 | 0.29722 | No |
| 33 | C33 | 0.99640 | 0.36660 | 0.49722 | No |
| 34 | C34 | 0.99640 | 0.36660 | 0.69722 | No |
| 35 | C35 | 0.99640 | 0.36660 | 0.89722 | No |
| 36 | C36 | 0.00360 | 0.63340 | 0.99722 | No |
| 37 | C37 | 0.00360 | 0.63340 | 0.19722 | No |
| 38 | C38 | 0.00360 | 0.63340 | 0.39722 | No |
| 39 | C39 | 0.00360 | 0.63340 | 0.59722 | No |
| 40 | C40 | 0.00360 | 0.63340 | 0.79722 | No |
| 41 | C41 | 0.49500 | 0.05130 | 0.12030 | No |
| 42 | C42 | 0.49500 | 0.05130 | 0.32030 | No |
| 43 | C43 | 0.49500 | 0.05130 | 0.52030 | No |
| 44 | C44 | 0.49500 | 0.05130 | 0.72030 | No |
| 45 | C45 | 0.49500 | 0.05130 | 0.92030 | No |
| 46 | C46 | 0.50500 | 0.94870 | 0.02030 | No |
| 47 | C47 | 0.50500 | 0.94870 | 0.22030 | No |
| 48 | C48 | 0.50500 | 0.94870 | 0.42030 | No |
| 49 | C49 | 0.50500 | 0.94870 | 0.62030 | No |
| 50 | C50 | 0.50500 | 0.94870 | 0.82030 | No |

|    |     |         |         |         |    |
|----|-----|---------|---------|---------|----|
| 51 | C51 | 0.99500 | 0.44870 | 0.12030 | No |
| 52 | C52 | 0.99500 | 0.44870 | 0.32030 | No |
| 53 | C53 | 0.99500 | 0.44870 | 0.52030 | No |
| 54 | C54 | 0.99500 | 0.44870 | 0.72030 | No |
| 55 | C55 | 0.99500 | 0.44870 | 0.92030 | No |
| 56 | C56 | 0.00500 | 0.55130 | 0.02030 | No |
| 57 | C57 | 0.00500 | 0.55130 | 0.22030 | No |
| 58 | C58 | 0.00500 | 0.55130 | 0.42030 | No |
| 59 | C59 | 0.00500 | 0.55130 | 0.62030 | No |
| 60 | C60 | 0.00500 | 0.55130 | 0.82030 | No |
| 61 | C61 | 0.40380 | 0.01810 | 0.12902 | No |
| 62 | C62 | 0.40380 | 0.01810 | 0.32902 | No |
| 63 | C63 | 0.40380 | 0.01810 | 0.52902 | No |
| 64 | C64 | 0.40380 | 0.01810 | 0.72902 | No |
| 65 | C65 | 0.40380 | 0.01810 | 0.92902 | No |
| 66 | C66 | 0.59620 | 0.98190 | 0.02902 | No |
| 67 | C67 | 0.59620 | 0.98190 | 0.22902 | No |
| 68 | C68 | 0.59620 | 0.98190 | 0.42902 | No |
| 69 | C69 | 0.59620 | 0.98190 | 0.62902 | No |
| 70 | C70 | 0.59620 | 0.98190 | 0.82902 | No |
| 71 | C71 | 0.90380 | 0.48190 | 0.12902 | No |
| 72 | C72 | 0.90380 | 0.48190 | 0.32902 | No |
| 73 | C73 | 0.90380 | 0.48190 | 0.52902 | No |
| 74 | C74 | 0.90380 | 0.48190 | 0.72902 | No |
| 75 | C75 | 0.90380 | 0.48190 | 0.92902 | No |
| 76 | C76 | 0.09620 | 0.51810 | 0.02902 | No |
| 77 | C77 | 0.09620 | 0.51810 | 0.22902 | No |
| 78 | C78 | 0.09620 | 0.51810 | 0.42902 | No |
| 79 | C79 | 0.09620 | 0.51810 | 0.62902 | No |
| 80 | C80 | 0.09620 | 0.51810 | 0.82902 | No |
| 81 | C81 | 0.34450 | 0.99030 | 0.10188 | No |
| 82 | C82 | 0.34450 | 0.99030 | 0.30188 | No |
| 83 | C83 | 0.34450 | 0.99030 | 0.50188 | No |
| 84 | C84 | 0.34450 | 0.99030 | 0.70188 | No |
| 85 | C85 | 0.34450 | 0.99030 | 0.90188 | No |
| 86 | C86 | 0.65550 | 0.00970 | 0.00188 | No |
| 87 | C87 | 0.65550 | 0.00970 | 0.20188 | No |
| 88 | C88 | 0.65550 | 0.00970 | 0.40188 | No |



|     |      |         |         |         |    |
|-----|------|---------|---------|---------|----|
| 89  | C89  | 0.65550 | 0.00970 | 0.60188 | No |
| 90  | C90  | 0.65550 | 0.00970 | 0.80188 | No |
| 91  | C91  | 0.84450 | 0.50970 | 0.10188 | No |
| 92  | C92  | 0.84450 | 0.50970 | 0.30188 | No |
| 93  | C93  | 0.84450 | 0.50970 | 0.50188 | No |
| 94  | C94  | 0.84450 | 0.50970 | 0.70188 | No |
| 95  | C95  | 0.84450 | 0.50970 | 0.90188 | No |
| 96  | C96  | 0.15550 | 0.49030 | 0.00188 | No |
| 97  | C97  | 0.15550 | 0.49030 | 0.20188 | No |
| 98  | C98  | 0.15550 | 0.49030 | 0.40188 | No |
| 99  | C99  | 0.15550 | 0.49030 | 0.60188 | No |
| 100 | C100 | 0.15550 | 0.49030 | 0.80188 | No |
| 101 | C101 | 0.25450 | 0.95520 | 0.11224 | No |
| 102 | C102 | 0.25450 | 0.95520 | 0.31224 | No |
| 103 | C103 | 0.25450 | 0.95520 | 0.51224 | No |
| 104 | C104 | 0.25450 | 0.95520 | 0.71224 | No |
| 105 | C105 | 0.25450 | 0.95520 | 0.91224 | No |
| 106 | C106 | 0.74550 | 0.04480 | 0.01224 | No |
| 107 | C107 | 0.74550 | 0.04480 | 0.21224 | No |
| 108 | C108 | 0.74550 | 0.04480 | 0.41224 | No |
| 109 | C109 | 0.74550 | 0.04480 | 0.61224 | No |
| 110 | C110 | 0.74550 | 0.04480 | 0.81224 | No |
| 111 | C111 | 0.75450 | 0.54480 | 0.11224 | No |
| 112 | C112 | 0.75450 | 0.54480 | 0.31224 | No |
| 113 | C113 | 0.75450 | 0.54480 | 0.51224 | No |
| 114 | C114 | 0.75450 | 0.54480 | 0.71224 | No |
| 115 | C115 | 0.75450 | 0.54480 | 0.91224 | No |
| 116 | C116 | 0.24550 | 0.45520 | 0.01224 | No |
| 117 | C117 | 0.24550 | 0.45520 | 0.21224 | No |
| 118 | C118 | 0.24550 | 0.45520 | 0.41224 | No |
| 119 | C119 | 0.24550 | 0.45520 | 0.61224 | No |
| 120 | C120 | 0.24550 | 0.45520 | 0.81224 | No |
| 121 | I1   | 0.48458 | 0.51909 | 0.04212 | No |
| 122 | I2   | 0.48458 | 0.51909 | 0.24212 | No |
| 123 | I3   | 0.48458 | 0.51909 | 0.44212 | No |
| 124 | I4   | 0.48458 | 0.51909 | 0.64212 | No |
| 125 | I5   | 0.48458 | 0.51909 | 0.84212 | No |
| 126 | I6   | 0.51542 | 0.48091 | 0.94212 | No |

|     |     |         |         |         |    |
|-----|-----|---------|---------|---------|----|
| 127 | I7  | 0.51542 | 0.48091 | 0.14212 | No |
| 128 | I8  | 0.51542 | 0.48091 | 0.34212 | No |
| 129 | I9  | 0.51542 | 0.48091 | 0.54212 | No |
| 130 | I10 | 0.51542 | 0.48091 | 0.74212 | No |
| 131 | I11 | 0.98458 | 0.98091 | 0.04212 | No |
| 132 | I12 | 0.98458 | 0.98091 | 0.24212 | No |
| 133 | I13 | 0.98458 | 0.98091 | 0.44212 | No |
| 134 | I14 | 0.98458 | 0.98091 | 0.64212 | No |
| 135 | I15 | 0.98458 | 0.98091 | 0.84212 | No |
| 136 | I16 | 0.01542 | 0.01909 | 0.94212 | No |
| 137 | I17 | 0.01542 | 0.01909 | 0.14212 | No |
| 138 | I18 | 0.01542 | 0.01909 | 0.34212 | No |
| 139 | I19 | 0.01542 | 0.01909 | 0.54212 | No |
| 140 | I20 | 0.01542 | 0.01909 | 0.74212 | No |
| 141 | I21 | 0.25948 | 0.45560 | 0.10194 | No |
| 142 | I22 | 0.25948 | 0.45560 | 0.30194 | No |
| 143 | I23 | 0.25948 | 0.45560 | 0.50194 | No |
| 144 | I24 | 0.25948 | 0.45560 | 0.70194 | No |
| 145 | I25 | 0.25948 | 0.45560 | 0.90194 | No |
| 146 | I26 | 0.74052 | 0.54440 | 0.00194 | No |
| 147 | I27 | 0.74052 | 0.54440 | 0.20194 | No |
| 148 | I28 | 0.74052 | 0.54440 | 0.40194 | No |
| 149 | I29 | 0.74052 | 0.54440 | 0.60194 | No |
| 150 | I30 | 0.74052 | 0.54440 | 0.80194 | No |
| 151 | I31 | 0.75948 | 0.04440 | 0.10194 | No |
| 152 | I32 | 0.75948 | 0.04440 | 0.30194 | No |
| 153 | I33 | 0.75948 | 0.04440 | 0.50194 | No |
| 154 | I34 | 0.75948 | 0.04440 | 0.70194 | No |
| 155 | I35 | 0.75948 | 0.04440 | 0.90194 | No |
| 156 | I36 | 0.24052 | 0.95560 | 0.00194 | No |
| 157 | I37 | 0.24052 | 0.95560 | 0.20194 | No |
| 158 | I38 | 0.24052 | 0.95560 | 0.40194 | No |
| 159 | I39 | 0.24052 | 0.95560 | 0.60194 | No |
| 160 | I40 | 0.24052 | 0.95560 | 0.80194 | No |
| 161 | I41 | 0.29912 | 0.73228 | 0.05329 | No |
| 162 | I42 | 0.29912 | 0.73228 | 0.25329 | No |
| 163 | I43 | 0.29912 | 0.73228 | 0.45329 | No |
| 164 | I44 | 0.29912 | 0.73228 | 0.65329 | No |

|     |     |         |         |         |    |
|-----|-----|---------|---------|---------|----|
| 165 | I45 | 0.29912 | 0.73228 | 0.85329 | No |
| 166 | I46 | 0.70088 | 0.26772 | 0.95329 | No |
| 167 | I47 | 0.70088 | 0.26772 | 0.15329 | No |
| 168 | I48 | 0.70088 | 0.26772 | 0.35329 | No |
| 169 | I49 | 0.70088 | 0.26772 | 0.55329 | No |
| 170 | I50 | 0.70088 | 0.26772 | 0.75329 | No |
| 171 | I51 | 0.79912 | 0.76772 | 0.05329 | No |
| 172 | I52 | 0.79912 | 0.76772 | 0.25329 | No |
| 173 | I53 | 0.79912 | 0.76772 | 0.45329 | No |
| 174 | I54 | 0.79912 | 0.76772 | 0.65329 | No |
| 175 | I55 | 0.79912 | 0.76772 | 0.85329 | No |
| 176 | I56 | 0.20088 | 0.23228 | 0.95329 | No |
| 177 | I57 | 0.20088 | 0.23228 | 0.15329 | No |
| 178 | I58 | 0.20088 | 0.23228 | 0.35329 | No |
| 179 | I59 | 0.20088 | 0.23228 | 0.55329 | No |
| 180 | I60 | 0.20088 | 0.23228 | 0.75329 | No |
| 181 | I61 | 0.30809 | 0.69835 | 0.15768 | No |
| 182 | I62 | 0.30809 | 0.69835 | 0.35768 | No |
| 183 | I63 | 0.30809 | 0.69835 | 0.55768 | No |
| 184 | I64 | 0.30809 | 0.69835 | 0.75768 | No |
| 185 | I65 | 0.30809 | 0.69835 | 0.95768 | No |
| 186 | I66 | 0.69191 | 0.30165 | 0.05768 | No |
| 187 | I67 | 0.69191 | 0.30165 | 0.25768 | No |
| 188 | I68 | 0.69191 | 0.30165 | 0.45768 | No |
| 189 | I69 | 0.69191 | 0.30165 | 0.65768 | No |
| 190 | I70 | 0.69191 | 0.30165 | 0.85768 | No |
| 191 | I71 | 0.80809 | 0.80165 | 0.15768 | No |
| 192 | I72 | 0.80809 | 0.80165 | 0.35768 | No |
| 193 | I73 | 0.80809 | 0.80165 | 0.55768 | No |
| 194 | I74 | 0.80809 | 0.80165 | 0.75768 | No |
| 195 | I75 | 0.80809 | 0.80165 | 0.95768 | No |
| 196 | I76 | 0.19191 | 0.19835 | 0.05768 | No |
| 197 | I77 | 0.19191 | 0.19835 | 0.25768 | No |
| 198 | I78 | 0.19191 | 0.19835 | 0.45768 | No |
| 199 | I79 | 0.19191 | 0.19835 | 0.65768 | No |
| 200 | I80 | 0.19191 | 0.19835 | 0.85768 | No |
| 201 | I81 | 0.54645 | 0.76181 | 0.10427 | No |
| 202 | I82 | 0.54645 | 0.76181 | 0.30427 | No |

|     |      |         |         |         |    |
|-----|------|---------|---------|---------|----|
| 203 | I83  | 0.54645 | 0.76181 | 0.50427 | No |
| 204 | I84  | 0.54645 | 0.76181 | 0.70427 | No |
| 205 | I85  | 0.54645 | 0.76181 | 0.90427 | No |
| 206 | I86  | 0.45355 | 0.23819 | 0.00427 | No |
| 207 | I87  | 0.45355 | 0.23819 | 0.20427 | No |
| 208 | I88  | 0.45355 | 0.23819 | 0.40427 | No |
| 209 | I89  | 0.45355 | 0.23819 | 0.60427 | No |
| 210 | I90  | 0.45355 | 0.23819 | 0.80427 | No |
| 211 | I91  | 0.04645 | 0.73819 | 0.10427 | No |
| 212 | I92  | 0.04645 | 0.73819 | 0.30427 | No |
| 213 | I93  | 0.04645 | 0.73819 | 0.50427 | No |
| 214 | I94  | 0.04645 | 0.73819 | 0.70427 | No |
| 215 | I95  | 0.04645 | 0.73819 | 0.90427 | No |
| 216 | I96  | 0.95355 | 0.26181 | 0.00427 | No |
| 217 | I97  | 0.95355 | 0.26181 | 0.20427 | No |
| 218 | I98  | 0.95355 | 0.26181 | 0.40427 | No |
| 219 | I99  | 0.95355 | 0.26181 | 0.60427 | No |
| 220 | I100 | 0.95355 | 0.26181 | 0.80427 | No |
| 221 | H1   | 0.43960 | 0.27810 | 0.06640 | No |
| 222 | H2   | 0.43960 | 0.27810 | 0.26640 | No |
| 223 | H3   | 0.43960 | 0.27810 | 0.46640 | No |
| 224 | H4   | 0.43960 | 0.27810 | 0.66640 | No |
| 225 | H5   | 0.43960 | 0.27810 | 0.86640 | No |
| 226 | H6   | 0.56040 | 0.72190 | 0.96640 | No |
| 227 | H7   | 0.56040 | 0.72190 | 0.16640 | No |
| 228 | H8   | 0.56040 | 0.72190 | 0.36640 | No |
| 229 | H9   | 0.56040 | 0.72190 | 0.56640 | No |
| 230 | H10  | 0.56040 | 0.72190 | 0.76640 | No |
| 231 | H11  | 0.93960 | 0.22190 | 0.06640 | No |
| 232 | H12  | 0.93960 | 0.22190 | 0.26640 | No |
| 233 | H13  | 0.93960 | 0.22190 | 0.46640 | No |
| 234 | H14  | 0.93960 | 0.22190 | 0.66640 | No |
| 235 | H15  | 0.93960 | 0.22190 | 0.86640 | No |
| 236 | H16  | 0.06040 | 0.77810 | 0.96640 | No |
| 237 | H17  | 0.06040 | 0.77810 | 0.16640 | No |
| 238 | H18  | 0.06040 | 0.77810 | 0.36640 | No |
| 239 | H19  | 0.06040 | 0.77810 | 0.56640 | No |
| 240 | H20  | 0.06040 | 0.77810 | 0.76640 | No |

|     |     |         |         |         |    |
|-----|-----|---------|---------|---------|----|
| 241 | H21 | 0.50570 | 0.32420 | 0.08704 | No |
| 242 | H22 | 0.50570 | 0.32420 | 0.28704 | No |
| 243 | H23 | 0.50570 | 0.32420 | 0.48704 | No |
| 244 | H24 | 0.50570 | 0.32420 | 0.68704 | No |
| 245 | H25 | 0.50570 | 0.32420 | 0.88704 | No |
| 246 | H26 | 0.49430 | 0.67580 | 0.98704 | No |
| 247 | H27 | 0.49430 | 0.67580 | 0.18704 | No |
| 248 | H28 | 0.49430 | 0.67580 | 0.38704 | No |
| 249 | H29 | 0.49430 | 0.67580 | 0.58704 | No |
| 250 | H30 | 0.49430 | 0.67580 | 0.78704 | No |
| 251 | H31 | 0.00570 | 0.17580 | 0.08704 | No |
| 252 | H32 | 0.00570 | 0.17580 | 0.28704 | No |
| 253 | H33 | 0.00570 | 0.17580 | 0.48704 | No |
| 254 | H34 | 0.00570 | 0.17580 | 0.68704 | No |
| 255 | H35 | 0.00570 | 0.17580 | 0.88704 | No |
| 256 | H36 | 0.99430 | 0.82420 | 0.98704 | No |
| 257 | H37 | 0.99430 | 0.82420 | 0.18704 | No |
| 258 | H38 | 0.99430 | 0.82420 | 0.38704 | No |
| 259 | H39 | 0.99430 | 0.82420 | 0.58704 | No |
| 260 | H40 | 0.99430 | 0.82420 | 0.78704 | No |
| 261 | H41 | 0.40970 | 0.34510 | 0.09086 | No |
| 262 | H42 | 0.40970 | 0.34510 | 0.29086 | No |
| 263 | H43 | 0.40970 | 0.34510 | 0.49086 | No |
| 264 | H44 | 0.40970 | 0.34510 | 0.69086 | No |
| 265 | H45 | 0.40970 | 0.34510 | 0.89086 | No |
| 266 | H46 | 0.59030 | 0.65490 | 0.99086 | No |
| 267 | H47 | 0.59030 | 0.65490 | 0.19086 | No |
| 268 | H48 | 0.59030 | 0.65490 | 0.39086 | No |
| 269 | H49 | 0.59030 | 0.65490 | 0.59086 | No |
| 270 | H50 | 0.59030 | 0.65490 | 0.79086 | No |
| 271 | H51 | 0.90970 | 0.15490 | 0.09086 | No |
| 272 | H52 | 0.90970 | 0.15490 | 0.29086 | No |
| 273 | H53 | 0.90970 | 0.15490 | 0.49086 | No |
| 274 | H54 | 0.90970 | 0.15490 | 0.69086 | No |
| 275 | H55 | 0.90970 | 0.15490 | 0.89086 | No |
| 276 | H56 | 0.09030 | 0.84510 | 0.99086 | No |
| 277 | H57 | 0.09030 | 0.84510 | 0.19086 | No |
| 278 | H58 | 0.09030 | 0.84510 | 0.39086 | No |

|     |     |         |         |         |    |
|-----|-----|---------|---------|---------|----|
| 279 | H59 | 0.09030 | 0.84510 | 0.59086 | No |
| 280 | H60 | 0.09030 | 0.84510 | 0.79086 | No |
| 281 | H61 | 0.22060 | 0.90500 | 0.07076 | No |
| 282 | H62 | 0.22060 | 0.90500 | 0.27076 | No |
| 283 | H63 | 0.22060 | 0.90500 | 0.47076 | No |
| 284 | H64 | 0.22060 | 0.90500 | 0.67076 | No |
| 285 | H65 | 0.22060 | 0.90500 | 0.87076 | No |
| 286 | H66 | 0.77940 | 0.09500 | 0.97076 | No |
| 287 | H67 | 0.77940 | 0.09500 | 0.17076 | No |
| 288 | H68 | 0.77940 | 0.09500 | 0.37076 | No |
| 289 | H69 | 0.77940 | 0.09500 | 0.57076 | No |
| 290 | H70 | 0.77940 | 0.09500 | 0.77076 | No |
| 291 | H71 | 0.72060 | 0.59500 | 0.07076 | No |
| 292 | H72 | 0.72060 | 0.59500 | 0.27076 | No |
| 293 | H73 | 0.72060 | 0.59500 | 0.47076 | No |
| 294 | H74 | 0.72060 | 0.59500 | 0.67076 | No |
| 295 | H75 | 0.72060 | 0.59500 | 0.87076 | No |
| 296 | H76 | 0.27940 | 0.40500 | 0.97076 | No |
| 297 | H77 | 0.27940 | 0.40500 | 0.17076 | No |
| 298 | H78 | 0.27940 | 0.40500 | 0.37076 | No |
| 299 | H79 | 0.27940 | 0.40500 | 0.57076 | No |
| 300 | H80 | 0.27940 | 0.40500 | 0.77076 | No |
| 301 | H81 | 0.17940 | 0.99870 | 0.07702 | No |
| 302 | H82 | 0.17940 | 0.99870 | 0.27702 | No |
| 303 | H83 | 0.17940 | 0.99870 | 0.47702 | No |
| 304 | H84 | 0.17940 | 0.99870 | 0.67702 | No |
| 305 | H85 | 0.17940 | 0.99870 | 0.87702 | No |
| 306 | H86 | 0.82060 | 0.00130 | 0.97702 | No |
| 307 | H87 | 0.82060 | 0.00130 | 0.17702 | No |
| 308 | H88 | 0.82060 | 0.00130 | 0.37702 | No |
| 309 | H89 | 0.82060 | 0.00130 | 0.57702 | No |
| 310 | H90 | 0.82060 | 0.00130 | 0.77702 | No |
| 311 | H91 | 0.67940 | 0.50130 | 0.07702 | No |
| 312 | H92 | 0.67940 | 0.50130 | 0.27702 | No |
| 313 | H93 | 0.67940 | 0.50130 | 0.47702 | No |
| 314 | H94 | 0.67940 | 0.50130 | 0.67702 | No |
| 315 | H95 | 0.67940 | 0.50130 | 0.87702 | No |
| 316 | H96 | 0.32060 | 0.49870 | 0.97702 | No |

|     |      |         |         |         |    |
|-----|------|---------|---------|---------|----|
| 317 | H97  | 0.32060 | 0.49870 | 0.17702 | No |
| 318 | H98  | 0.32060 | 0.49870 | 0.37702 | No |
| 319 | H99  | 0.32060 | 0.49870 | 0.57702 | No |
| 320 | H100 | 0.32060 | 0.49870 | 0.77702 | No |
| 321 | H101 | 0.14300 | 0.91200 | 0.09190 | No |
| 322 | H102 | 0.14300 | 0.91200 | 0.29190 | No |
| 323 | H103 | 0.14300 | 0.91200 | 0.49190 | No |
| 324 | H104 | 0.14300 | 0.91200 | 0.69190 | No |
| 325 | H105 | 0.14300 | 0.91200 | 0.89190 | No |
| 326 | H106 | 0.85700 | 0.08800 | 0.99190 | No |
| 327 | H107 | 0.85700 | 0.08800 | 0.19190 | No |
| 328 | H108 | 0.85700 | 0.08800 | 0.39190 | No |
| 329 | H109 | 0.85700 | 0.08800 | 0.59190 | No |
| 330 | H110 | 0.85700 | 0.08800 | 0.79190 | No |
| 331 | H111 | 0.64300 | 0.58800 | 0.09190 | No |
| 332 | H112 | 0.64300 | 0.58800 | 0.29190 | No |
| 333 | H113 | 0.64300 | 0.58800 | 0.49190 | No |
| 334 | H114 | 0.64300 | 0.58800 | 0.69190 | No |
| 335 | H115 | 0.64300 | 0.58800 | 0.89190 | No |
| 336 | H116 | 0.35700 | 0.41200 | 0.99190 | No |
| 337 | H117 | 0.35700 | 0.41200 | 0.19190 | No |
| 338 | H118 | 0.35700 | 0.41200 | 0.39190 | No |
| 339 | H119 | 0.35700 | 0.41200 | 0.59190 | No |
| 340 | H120 | 0.35700 | 0.41200 | 0.79190 | No |
| 341 | H121 | 0.37870 | 0.20070 | 0.11042 | No |
| 342 | H122 | 0.37870 | 0.20070 | 0.31042 | No |
| 343 | H123 | 0.37870 | 0.20070 | 0.51042 | No |
| 344 | H124 | 0.37870 | 0.20070 | 0.71042 | No |
| 345 | H125 | 0.37870 | 0.20070 | 0.91042 | No |
| 346 | H126 | 0.62130 | 0.79930 | 0.01042 | No |
| 347 | H127 | 0.62130 | 0.79930 | 0.21042 | No |
| 348 | H128 | 0.62130 | 0.79930 | 0.41042 | No |
| 349 | H129 | 0.62130 | 0.79930 | 0.61042 | No |
| 350 | H130 | 0.62130 | 0.79930 | 0.81042 | No |
| 351 | H131 | 0.87870 | 0.29930 | 0.11042 | No |
| 352 | H132 | 0.87870 | 0.29930 | 0.31042 | No |
| 353 | H133 | 0.87870 | 0.29930 | 0.51042 | No |
| 354 | H134 | 0.87870 | 0.29930 | 0.71042 | No |

|     |      |         |         |         |    |
|-----|------|---------|---------|---------|----|
| 355 | H135 | 0.87870 | 0.29930 | 0.91042 | No |
| 356 | H136 | 0.12130 | 0.70070 | 0.01042 | No |
| 357 | H137 | 0.12130 | 0.70070 | 0.21042 | No |
| 358 | H138 | 0.12130 | 0.70070 | 0.41042 | No |
| 359 | H139 | 0.12130 | 0.70070 | 0.61042 | No |
| 360 | H140 | 0.12130 | 0.70070 | 0.81042 | No |
| 361 | H141 | 0.46340 | 0.23930 | 0.12906 | No |
| 362 | H142 | 0.46340 | 0.23930 | 0.32906 | No |
| 363 | H143 | 0.46340 | 0.23930 | 0.52906 | No |
| 364 | H144 | 0.46340 | 0.23930 | 0.72906 | No |
| 365 | H145 | 0.46340 | 0.23930 | 0.92906 | No |
| 366 | H146 | 0.53660 | 0.76070 | 0.02906 | No |
| 367 | H147 | 0.53660 | 0.76070 | 0.22906 | No |
| 368 | H148 | 0.53660 | 0.76070 | 0.42906 | No |
| 369 | H149 | 0.53660 | 0.76070 | 0.62906 | No |
| 370 | H150 | 0.53660 | 0.76070 | 0.82906 | No |
| 371 | H151 | 0.96340 | 0.26070 | 0.12906 | No |
| 372 | H152 | 0.96340 | 0.26070 | 0.32906 | No |
| 373 | H153 | 0.96340 | 0.26070 | 0.52906 | No |
| 374 | H154 | 0.96340 | 0.26070 | 0.72906 | No |
| 375 | H155 | 0.96340 | 0.26070 | 0.92906 | No |
| 376 | H156 | 0.03660 | 0.73930 | 0.02906 | No |
| 377 | H157 | 0.03660 | 0.73930 | 0.22906 | No |
| 378 | H158 | 0.03660 | 0.73930 | 0.42906 | No |
| 379 | H159 | 0.03660 | 0.73930 | 0.62906 | No |
| 380 | H160 | 0.03660 | 0.73930 | 0.82906 | No |
| 381 | H161 | 0.47240 | 0.11130 | 0.07710 | No |
| 382 | H162 | 0.47240 | 0.11130 | 0.27710 | No |
| 383 | H163 | 0.47240 | 0.11130 | 0.47710 | No |
| 384 | H164 | 0.47240 | 0.11130 | 0.67710 | No |
| 385 | H165 | 0.47240 | 0.11130 | 0.87710 | No |
| 386 | H166 | 0.52760 | 0.88870 | 0.97710 | No |
| 387 | H167 | 0.52760 | 0.88870 | 0.17710 | No |
| 388 | H168 | 0.52760 | 0.88870 | 0.37710 | No |
| 389 | H169 | 0.52760 | 0.88870 | 0.57710 | No |
| 390 | H170 | 0.52760 | 0.88870 | 0.77710 | No |
| 391 | H171 | 0.97240 | 0.38870 | 0.07710 | No |
| 392 | H172 | 0.97240 | 0.38870 | 0.27710 | No |



|     |      |         |         |         |    |
|-----|------|---------|---------|---------|----|
| 393 | H173 | 0.97240 | 0.38870 | 0.47710 | No |
| 394 | H174 | 0.97240 | 0.38870 | 0.67710 | No |
| 395 | H175 | 0.97240 | 0.38870 | 0.87710 | No |
| 396 | H176 | 0.02760 | 0.61130 | 0.97710 | No |
| 397 | H177 | 0.02760 | 0.61130 | 0.17710 | No |
| 398 | H178 | 0.02760 | 0.61130 | 0.37710 | No |
| 399 | H179 | 0.02760 | 0.61130 | 0.57710 | No |
| 400 | H180 | 0.02760 | 0.61130 | 0.77710 | No |
| 401 | H181 | 0.55860 | 0.15340 | 0.09382 | No |
| 402 | H182 | 0.55860 | 0.15340 | 0.29382 | No |
| 403 | H183 | 0.55860 | 0.15340 | 0.49382 | No |
| 404 | H184 | 0.55860 | 0.15340 | 0.69382 | No |
| 405 | H185 | 0.55860 | 0.15340 | 0.89382 | No |
| 406 | H186 | 0.44140 | 0.84660 | 0.99382 | No |
| 407 | H187 | 0.44140 | 0.84660 | 0.19382 | No |
| 408 | H188 | 0.44140 | 0.84660 | 0.39382 | No |
| 409 | H189 | 0.44140 | 0.84660 | 0.59382 | No |
| 410 | H190 | 0.44140 | 0.84660 | 0.79382 | No |
| 411 | H191 | 0.05860 | 0.34660 | 0.09382 | No |
| 412 | H192 | 0.05860 | 0.34660 | 0.29382 | No |
| 413 | H193 | 0.05860 | 0.34660 | 0.49382 | No |
| 414 | H194 | 0.05860 | 0.34660 | 0.69382 | No |
| 415 | H195 | 0.05860 | 0.34660 | 0.89382 | No |
| 416 | H196 | 0.94140 | 0.65340 | 0.99382 | No |
| 417 | H197 | 0.94140 | 0.65340 | 0.19382 | No |
| 418 | H198 | 0.94140 | 0.65340 | 0.39382 | No |
| 419 | H199 | 0.94140 | 0.65340 | 0.59382 | No |
| 420 | H200 | 0.94140 | 0.65340 | 0.79382 | No |
| 421 | H201 | 0.52810 | 0.99740 | 0.11126 | No |
| 422 | H202 | 0.52810 | 0.99740 | 0.31126 | No |
| 423 | H203 | 0.52810 | 0.99740 | 0.51126 | No |
| 424 | H204 | 0.52810 | 0.99740 | 0.71126 | No |
| 425 | H205 | 0.52810 | 0.99740 | 0.91126 | No |
| 426 | H206 | 0.47190 | 0.00260 | 0.01126 | No |
| 427 | H207 | 0.47190 | 0.00260 | 0.21126 | No |
| 428 | H208 | 0.47190 | 0.00260 | 0.41126 | No |
| 429 | H209 | 0.47190 | 0.00260 | 0.61126 | No |
| 430 | H210 | 0.47190 | 0.00260 | 0.81126 | No |

|     |      |         |         |         |    |
|-----|------|---------|---------|---------|----|
| 431 | H211 | 0.02810 | 0.50260 | 0.11126 | No |
| 432 | H212 | 0.02810 | 0.50260 | 0.31126 | No |
| 433 | H213 | 0.02810 | 0.50260 | 0.51126 | No |
| 434 | H214 | 0.02810 | 0.50260 | 0.71126 | No |
| 435 | H215 | 0.02810 | 0.50260 | 0.91126 | No |
| 436 | H216 | 0.97190 | 0.49740 | 0.01126 | No |
| 437 | H217 | 0.97190 | 0.49740 | 0.21126 | No |
| 438 | H218 | 0.97190 | 0.49740 | 0.41126 | No |
| 439 | H219 | 0.97190 | 0.49740 | 0.61126 | No |
| 440 | H220 | 0.97190 | 0.49740 | 0.81126 | No |
| 441 | H221 | 0.52650 | 0.07110 | 0.13938 | No |
| 442 | H222 | 0.52650 | 0.07110 | 0.33938 | No |
| 443 | H223 | 0.52650 | 0.07110 | 0.53938 | No |
| 444 | H224 | 0.52650 | 0.07110 | 0.73938 | No |
| 445 | H225 | 0.52650 | 0.07110 | 0.93938 | No |
| 446 | H226 | 0.47350 | 0.92890 | 0.03938 | No |
| 447 | H227 | 0.47350 | 0.92890 | 0.23938 | No |
| 448 | H228 | 0.47350 | 0.92890 | 0.43938 | No |
| 449 | H229 | 0.47350 | 0.92890 | 0.63938 | No |
| 450 | H230 | 0.47350 | 0.92890 | 0.83938 | No |
| 451 | H231 | 0.02650 | 0.42890 | 0.13938 | No |
| 452 | H232 | 0.02650 | 0.42890 | 0.33938 | No |
| 453 | H233 | 0.02650 | 0.42890 | 0.53938 | No |
| 454 | H234 | 0.02650 | 0.42890 | 0.73938 | No |
| 455 | H235 | 0.02650 | 0.42890 | 0.93938 | No |
| 456 | H236 | 0.97350 | 0.57110 | 0.03938 | No |
| 457 | H237 | 0.97350 | 0.57110 | 0.23938 | No |
| 458 | H238 | 0.97350 | 0.57110 | 0.43938 | No |
| 459 | H239 | 0.97350 | 0.57110 | 0.63938 | No |
| 460 | H240 | 0.97350 | 0.57110 | 0.83938 | No |
| 461 | H241 | 0.37400 | 0.06910 | 0.14084 | No |
| 462 | H242 | 0.37400 | 0.06910 | 0.34084 | No |
| 463 | H243 | 0.37400 | 0.06910 | 0.54084 | No |
| 464 | H244 | 0.37400 | 0.06910 | 0.74084 | No |
| 465 | H245 | 0.37400 | 0.06910 | 0.94084 | No |
| 466 | H246 | 0.62600 | 0.93090 | 0.04084 | No |
| 467 | H247 | 0.62600 | 0.93090 | 0.24084 | No |
| 468 | H248 | 0.62600 | 0.93090 | 0.44084 | No |

|     |      |         |         |         |    |
|-----|------|---------|---------|---------|----|
| 469 | H249 | 0.62600 | 0.93090 | 0.64084 | No |
| 470 | H250 | 0.62600 | 0.93090 | 0.84084 | No |
| 471 | H251 | 0.87400 | 0.43090 | 0.14084 | No |
| 472 | H252 | 0.87400 | 0.43090 | 0.34084 | No |
| 473 | H253 | 0.87400 | 0.43090 | 0.54084 | No |
| 474 | H254 | 0.87400 | 0.43090 | 0.74084 | No |
| 475 | H255 | 0.87400 | 0.43090 | 0.94084 | No |
| 476 | H256 | 0.12600 | 0.56910 | 0.04084 | No |
| 477 | H257 | 0.12600 | 0.56910 | 0.24084 | No |
| 478 | H258 | 0.12600 | 0.56910 | 0.44084 | No |
| 479 | H259 | 0.12600 | 0.56910 | 0.64084 | No |
| 480 | H260 | 0.12600 | 0.56910 | 0.84084 | No |
| 481 | H261 | 0.40970 | 0.96290 | 0.14300 | No |
| 482 | H262 | 0.40970 | 0.96290 | 0.34300 | No |
| 483 | H263 | 0.40970 | 0.96290 | 0.54300 | No |
| 484 | H264 | 0.40970 | 0.96290 | 0.74300 | No |
| 485 | H265 | 0.40970 | 0.96290 | 0.94300 | No |
| 486 | H266 | 0.59030 | 0.03710 | 0.04300 | No |
| 487 | H267 | 0.59030 | 0.03710 | 0.24300 | No |
| 488 | H268 | 0.59030 | 0.03710 | 0.44300 | No |
| 489 | H269 | 0.59030 | 0.03710 | 0.64300 | No |
| 490 | H270 | 0.59030 | 0.03710 | 0.84300 | No |
| 491 | H271 | 0.90970 | 0.53710 | 0.14300 | No |
| 492 | H272 | 0.90970 | 0.53710 | 0.34300 | No |
| 493 | H273 | 0.90970 | 0.53710 | 0.54300 | No |
| 494 | H274 | 0.90970 | 0.53710 | 0.74300 | No |
| 495 | H275 | 0.90970 | 0.53710 | 0.94300 | No |
| 496 | H276 | 0.09030 | 0.46290 | 0.04300 | No |
| 497 | H277 | 0.09030 | 0.46290 | 0.24300 | No |
| 498 | H278 | 0.09030 | 0.46290 | 0.44300 | No |
| 499 | H279 | 0.09030 | 0.46290 | 0.64300 | No |
| 500 | H280 | 0.09030 | 0.46290 | 0.84300 | No |
| 501 | H281 | 0.33640 | 0.04580 | 0.08812 | No |
| 502 | H282 | 0.33640 | 0.04580 | 0.28812 | No |
| 503 | H283 | 0.33640 | 0.04580 | 0.48812 | No |
| 504 | H284 | 0.33640 | 0.04580 | 0.68812 | No |
| 505 | H285 | 0.33640 | 0.04580 | 0.88812 | No |
| 506 | H286 | 0.66360 | 0.95420 | 0.98812 | No |

|     |      |         |         |         |    |
|-----|------|---------|---------|---------|----|
| 507 | H287 | 0.66360 | 0.95420 | 0.18812 | No |
| 508 | H288 | 0.66360 | 0.95420 | 0.38812 | No |
| 509 | H289 | 0.66360 | 0.95420 | 0.58812 | No |
| 510 | H290 | 0.66360 | 0.95420 | 0.78812 | No |
| 511 | H291 | 0.83640 | 0.45420 | 0.08812 | No |
| 512 | H292 | 0.83640 | 0.45420 | 0.28812 | No |
| 513 | H293 | 0.83640 | 0.45420 | 0.48812 | No |
| 514 | H294 | 0.83640 | 0.45420 | 0.68812 | No |
| 515 | H295 | 0.83640 | 0.45420 | 0.88812 | No |
| 516 | H296 | 0.16360 | 0.54580 | 0.98812 | No |
| 517 | H297 | 0.16360 | 0.54580 | 0.18812 | No |
| 518 | H298 | 0.16360 | 0.54580 | 0.38812 | No |
| 519 | H299 | 0.16360 | 0.54580 | 0.58812 | No |
| 520 | H300 | 0.16360 | 0.54580 | 0.78812 | No |
| 521 | H301 | 0.37410 | 0.93990 | 0.08970 | No |
| 522 | H302 | 0.37410 | 0.93990 | 0.28970 | No |
| 523 | H303 | 0.37410 | 0.93990 | 0.48970 | No |
| 524 | H304 | 0.37410 | 0.93990 | 0.68970 | No |
| 525 | H305 | 0.37410 | 0.93990 | 0.88970 | No |
| 526 | H306 | 0.62590 | 0.06010 | 0.98970 | No |
| 527 | H307 | 0.62590 | 0.06010 | 0.18970 | No |
| 528 | H308 | 0.62590 | 0.06010 | 0.38970 | No |
| 529 | H309 | 0.62590 | 0.06010 | 0.58970 | No |
| 530 | H310 | 0.62590 | 0.06010 | 0.78970 | No |
| 531 | H311 | 0.87410 | 0.56010 | 0.08970 | No |
| 532 | H312 | 0.87410 | 0.56010 | 0.28970 | No |
| 533 | H313 | 0.87410 | 0.56010 | 0.48970 | No |
| 534 | H314 | 0.87410 | 0.56010 | 0.68970 | No |
| 535 | H315 | 0.87410 | 0.56010 | 0.88970 | No |
| 536 | H316 | 0.12590 | 0.43990 | 0.98970 | No |
| 537 | H317 | 0.12590 | 0.43990 | 0.18970 | No |
| 538 | H318 | 0.12590 | 0.43990 | 0.38970 | No |
| 539 | H319 | 0.12590 | 0.43990 | 0.58970 | No |
| 540 | H320 | 0.12590 | 0.43990 | 0.78970 | No |
| 541 | H321 | 0.26160 | 0.89450 | 0.12342 | No |
| 542 | H322 | 0.26160 | 0.89450 | 0.32342 | No |
| 543 | H323 | 0.26160 | 0.89450 | 0.52342 | No |
| 544 | H324 | 0.26160 | 0.89450 | 0.72342 | No |

|     |      |         |         |         |    |
|-----|------|---------|---------|---------|----|
| 545 | H325 | 0.26160 | 0.89450 | 0.92342 | No |
| 546 | H326 | 0.73840 | 0.10550 | 0.02342 | No |
| 547 | H327 | 0.73840 | 0.10550 | 0.22342 | No |
| 548 | H328 | 0.73840 | 0.10550 | 0.42342 | No |
| 549 | H329 | 0.73840 | 0.10550 | 0.62342 | No |
| 550 | H330 | 0.73840 | 0.10550 | 0.82342 | No |
| 551 | H331 | 0.76160 | 0.60550 | 0.12342 | No |
| 552 | H332 | 0.76160 | 0.60550 | 0.32342 | No |
| 553 | H333 | 0.76160 | 0.60550 | 0.52342 | No |
| 554 | H334 | 0.76160 | 0.60550 | 0.72342 | No |
| 555 | H335 | 0.76160 | 0.60550 | 0.92342 | No |
| 556 | H336 | 0.23840 | 0.39450 | 0.02342 | No |
| 557 | H337 | 0.23840 | 0.39450 | 0.22342 | No |
| 558 | H338 | 0.23840 | 0.39450 | 0.42342 | No |
| 559 | H339 | 0.23840 | 0.39450 | 0.62342 | No |
| 560 | H340 | 0.23840 | 0.39450 | 0.82342 | No |
| 561 | H341 | 0.22810 | 0.00160 | 0.12678 | No |
| 562 | H342 | 0.22810 | 0.00160 | 0.32678 | No |
| 563 | H343 | 0.22810 | 0.00160 | 0.52678 | No |
| 564 | H344 | 0.22810 | 0.00160 | 0.72678 | No |
| 565 | H345 | 0.22810 | 0.00160 | 0.92678 | No |
| 566 | H346 | 0.77190 | 0.99840 | 0.02678 | No |
| 567 | H347 | 0.77190 | 0.99840 | 0.22678 | No |
| 568 | H348 | 0.77190 | 0.99840 | 0.42678 | No |
| 569 | H349 | 0.77190 | 0.99840 | 0.62678 | No |
| 570 | H350 | 0.77190 | 0.99840 | 0.82678 | No |
| 571 | H351 | 0.72810 | 0.49840 | 0.12678 | No |
| 572 | H352 | 0.72810 | 0.49840 | 0.32678 | No |
| 573 | H353 | 0.72810 | 0.49840 | 0.52678 | No |
| 574 | H354 | 0.72810 | 0.49840 | 0.72678 | No |
| 575 | H355 | 0.72810 | 0.49840 | 0.92678 | No |
| 576 | H356 | 0.27190 | 0.50160 | 0.02678 | No |
| 577 | H357 | 0.27190 | 0.50160 | 0.22678 | No |
| 578 | H358 | 0.27190 | 0.50160 | 0.42678 | No |
| 579 | H359 | 0.27190 | 0.50160 | 0.62678 | No |
| 580 | H360 | 0.27190 | 0.50160 | 0.82678 | No |
| 581 | Bi1  | 0.38917 | 0.62103 | 0.30063 | No |
| 582 | Bi2  | 0.38917 | 0.62103 | 0.50063 | No |

|     |      |         |         |         |    |
|-----|------|---------|---------|---------|----|
| 583 | Bi3  | 0.38917 | 0.62103 | 0.70063 | No |
| 584 | Bi4  | 0.61083 | 0.37897 | 0.20063 | No |
| 585 | Bi5  | 0.61083 | 0.37897 | 0.40063 | No |
| 586 | Bi6  | 0.61083 | 0.37897 | 0.60063 | No |
| 587 | Bi7  | 0.88917 | 0.87897 | 0.10063 | No |
| 588 | Bi8  | 0.88917 | 0.87897 | 0.30063 | No |
| 589 | Bi9  | 0.88917 | 0.87897 | 0.50063 | No |
| 590 | Bi10 | 0.88917 | 0.87897 | 0.90063 | No |
| 591 | Bi11 | 0.11083 | 0.12103 | 0.20063 | No |
| 592 | Bi12 | 0.11083 | 0.12103 | 0.80063 | No |
| 593 | N1   | 0.45000 | 0.29950 | 0.08598 | No |
| 594 | N2   | 0.45000 | 0.29950 | 0.28598 | No |
| 595 | N3   | 0.45000 | 0.29950 | 0.48598 | No |
| 596 | N4   | 0.45000 | 0.29950 | 0.68598 | No |
| 597 | N5   | 0.45000 | 0.29950 | 0.88598 | No |
| 598 | N6   | 0.55000 | 0.70050 | 0.98598 | No |
| 599 | N7   | 0.55000 | 0.70050 | 0.18598 | No |
| 600 | N8   | 0.55000 | 0.70050 | 0.38598 | No |
| 601 | N9   | 0.55000 | 0.70050 | 0.58598 | No |
| 602 | N10  | 0.55000 | 0.70050 | 0.78598 | No |
| 603 | N11  | 0.95000 | 0.20050 | 0.08598 | No |
| 604 | N12  | 0.95000 | 0.20050 | 0.28598 | No |
| 605 | N13  | 0.95000 | 0.20050 | 0.48598 | No |
| 606 | N14  | 0.95000 | 0.20050 | 0.68598 | No |
| 607 | N15  | 0.95000 | 0.20050 | 0.88598 | No |
| 608 | N16  | 0.05000 | 0.79950 | 0.98598 | No |
| 609 | N17  | 0.05000 | 0.79950 | 0.18598 | No |
| 610 | N18  | 0.05000 | 0.79950 | 0.38598 | No |
| 611 | N19  | 0.05000 | 0.79950 | 0.58598 | No |
| 612 | N20  | 0.05000 | 0.79950 | 0.78598 | No |
| 613 | N21  | 0.19340 | 0.94140 | 0.08536 | No |
| 614 | N22  | 0.19340 | 0.94140 | 0.28536 | No |
| 615 | N23  | 0.19340 | 0.94140 | 0.48536 | No |
| 616 | N24  | 0.19340 | 0.94140 | 0.68536 | No |
| 617 | N25  | 0.19340 | 0.94140 | 0.88536 | No |
| 618 | N26  | 0.80660 | 0.05860 | 0.98536 | No |
| 619 | N27  | 0.80660 | 0.05860 | 0.18536 | No |
| 620 | N28  | 0.80660 | 0.05860 | 0.38536 | No |

|     |     |         |         |         |    |
|-----|-----|---------|---------|---------|----|
| 621 | N29 | 0.80660 | 0.05860 | 0.58536 | No |
| 622 | N30 | 0.80660 | 0.05860 | 0.78536 | No |
| 623 | N31 | 0.69340 | 0.55860 | 0.08536 | No |
| 624 | N32 | 0.69340 | 0.55860 | 0.28536 | No |
| 625 | N33 | 0.69340 | 0.55860 | 0.48536 | No |
| 626 | N34 | 0.69340 | 0.55860 | 0.68536 | No |
| 627 | N35 | 0.69340 | 0.55860 | 0.88536 | No |
| 628 | N36 | 0.30660 | 0.44140 | 0.98536 | No |
| 629 | N37 | 0.30660 | 0.44140 | 0.18536 | No |
| 630 | N38 | 0.30660 | 0.44140 | 0.38536 | No |
| 631 | N39 | 0.30660 | 0.44140 | 0.58536 | No |
| 632 | N40 | 0.30660 | 0.44140 | 0.78536 | No |
| 633 | Sb1 | 0.38917 | 0.62103 | 0.10063 | No |
| 634 | Sb2 | 0.38917 | 0.62103 | 0.90063 | No |
| 635 | Sb3 | 0.61083 | 0.37897 | 0.00063 | No |
| 636 | Sb4 | 0.61083 | 0.37897 | 0.80063 | No |
| 637 | Sb5 | 0.88917 | 0.87897 | 0.70063 | No |
| 638 | Sb6 | 0.11083 | 0.12103 | 0.00063 | No |
| 639 | Sb7 | 0.11083 | 0.12103 | 0.40063 | No |
| 640 | Sb8 | 0.11083 | 0.12103 | 0.60063 | No |

## Reflex Summary Report for Rietveld Refinement of 0.5[C<sub>6</sub>N<sub>2</sub>H<sub>18</sub>][BiI<sub>5</sub>+0.5[C<sub>6</sub>N<sub>2</sub>H<sub>18</sub>][SbI<sub>5</sub> :

### Lattice Parameters

Lattice Type: Triclinic Space Group: P 1

| Parameter | Value              | Refined? |
|-----------|--------------------|----------|
| a         | 15.18922 ± 0.09999 | Yes      |
| b         | 14.07900 ± 0.09154 | Yes      |
| c         | 43.10229 ± 0.28796 | Yes      |
| α         | 86.18424 ± 0.04141 | Yes      |
| β         | 92.30210 ± 0.03933 | Yes      |
| γ         | 90.14920 ± 0.07023 | Yes      |

### Structure Parameters

Refined Motion Groups: 0
Refined Torsions: 0

Refined Angles: 0
Refined Distances: 0

Number of Refined DOF: 0

### Fractional Coordinates

| No. | Name | u | v | w | Refined? |
|-----|------|---|---|---|----------|
|-----|------|---|---|---|----------|

|    |     |         |         |         |    |
|----|-----|---------|---------|---------|----|
| 1  | C1  | 0.44190 | 0.21900 | 0.10840 | No |
| 2  | C2  | 0.44190 | 0.21900 | 0.30840 | No |
| 3  | C3  | 0.44190 | 0.21900 | 0.50840 | No |
| 4  | C4  | 0.44190 | 0.21900 | 0.70840 | No |
| 5  | C5  | 0.44190 | 0.21900 | 0.90840 | No |
| 6  | C6  | 0.55810 | 0.78100 | 0.00840 | No |
| 7  | C7  | 0.55810 | 0.78100 | 0.20840 | No |
| 8  | C8  | 0.55810 | 0.78100 | 0.40840 | No |
| 9  | C9  | 0.55810 | 0.78100 | 0.60840 | No |
| 10 | C10 | 0.55810 | 0.78100 | 0.80840 | No |
| 11 | C11 | 0.94190 | 0.28100 | 0.10840 | No |
| 12 | C12 | 0.94190 | 0.28100 | 0.30840 | No |
| 13 | C13 | 0.94190 | 0.28100 | 0.50840 | No |
| 14 | C14 | 0.94190 | 0.28100 | 0.70840 | No |
| 15 | C15 | 0.94190 | 0.28100 | 0.90840 | No |
| 16 | C16 | 0.05810 | 0.71900 | 0.00840 | No |
| 17 | C17 | 0.05810 | 0.71900 | 0.20840 | No |
| 18 | C18 | 0.05810 | 0.71900 | 0.40840 | No |
| 19 | C19 | 0.05810 | 0.71900 | 0.60840 | No |
| 20 | C20 | 0.05810 | 0.71900 | 0.80840 | No |
| 21 | C21 | 0.49640 | 0.13340 | 0.09722 | No |
| 22 | C22 | 0.49640 | 0.13340 | 0.29722 | No |
| 23 | C23 | 0.49640 | 0.13340 | 0.49722 | No |
| 24 | C24 | 0.49640 | 0.13340 | 0.69722 | No |
| 25 | C25 | 0.49640 | 0.13340 | 0.89722 | No |
| 26 | C26 | 0.50360 | 0.86660 | 0.99722 | No |
| 27 | C27 | 0.50360 | 0.86660 | 0.19722 | No |
| 28 | C28 | 0.50360 | 0.86660 | 0.39722 | No |
| 29 | C29 | 0.50360 | 0.86660 | 0.59722 | No |
| 30 | C30 | 0.50360 | 0.86660 | 0.79722 | No |
| 31 | C31 | 0.99640 | 0.36660 | 0.09722 | No |
| 32 | C32 | 0.99640 | 0.36660 | 0.29722 | No |
| 33 | C33 | 0.99640 | 0.36660 | 0.49722 | No |
| 34 | C34 | 0.99640 | 0.36660 | 0.69722 | No |
| 35 | C35 | 0.99640 | 0.36660 | 0.89722 | No |
| 36 | C36 | 0.00360 | 0.63340 | 0.99722 | No |
| 37 | C37 | 0.00360 | 0.63340 | 0.19722 | No |
| 38 | C38 | 0.00360 | 0.63340 | 0.39722 | No |



|    |     |         |         |         |    |
|----|-----|---------|---------|---------|----|
| 39 | C39 | 0.00360 | 0.63340 | 0.59722 | No |
| 40 | C40 | 0.00360 | 0.63340 | 0.79722 | No |
| 41 | C41 | 0.49500 | 0.05130 | 0.12030 | No |
| 42 | C42 | 0.49500 | 0.05130 | 0.32030 | No |
| 43 | C43 | 0.49500 | 0.05130 | 0.52030 | No |
| 44 | C44 | 0.49500 | 0.05130 | 0.72030 | No |
| 45 | C45 | 0.49500 | 0.05130 | 0.92030 | No |
| 46 | C46 | 0.50500 | 0.94870 | 0.02030 | No |
| 47 | C47 | 0.50500 | 0.94870 | 0.22030 | No |
| 48 | C48 | 0.50500 | 0.94870 | 0.42030 | No |
| 49 | C49 | 0.50500 | 0.94870 | 0.62030 | No |
| 50 | C50 | 0.50500 | 0.94870 | 0.82030 | No |
| 51 | C51 | 0.99500 | 0.44870 | 0.12030 | No |
| 52 | C52 | 0.99500 | 0.44870 | 0.32030 | No |
| 53 | C53 | 0.99500 | 0.44870 | 0.52030 | No |
| 54 | C54 | 0.99500 | 0.44870 | 0.72030 | No |
| 55 | C55 | 0.99500 | 0.44870 | 0.92030 | No |
| 56 | C56 | 0.00500 | 0.55130 | 0.02030 | No |
| 57 | C57 | 0.00500 | 0.55130 | 0.22030 | No |
| 58 | C58 | 0.00500 | 0.55130 | 0.42030 | No |
| 59 | C59 | 0.00500 | 0.55130 | 0.62030 | No |
| 60 | C60 | 0.00500 | 0.55130 | 0.82030 | No |
| 61 | C61 | 0.40380 | 0.01810 | 0.12902 | No |
| 62 | C62 | 0.40380 | 0.01810 | 0.32902 | No |
| 63 | C63 | 0.40380 | 0.01810 | 0.52902 | No |
| 64 | C64 | 0.40380 | 0.01810 | 0.72902 | No |
| 65 | C65 | 0.40380 | 0.01810 | 0.92902 | No |
| 66 | C66 | 0.59620 | 0.98190 | 0.02902 | No |
| 67 | C67 | 0.59620 | 0.98190 | 0.22902 | No |
| 68 | C68 | 0.59620 | 0.98190 | 0.42902 | No |
| 69 | C69 | 0.59620 | 0.98190 | 0.62902 | No |
| 70 | C70 | 0.59620 | 0.98190 | 0.82902 | No |
| 71 | C71 | 0.90380 | 0.48190 | 0.12902 | No |
| 72 | C72 | 0.90380 | 0.48190 | 0.32902 | No |
| 73 | C73 | 0.90380 | 0.48190 | 0.52902 | No |
| 74 | C74 | 0.90380 | 0.48190 | 0.72902 | No |
| 75 | C75 | 0.90380 | 0.48190 | 0.92902 | No |
| 76 | C76 | 0.09620 | 0.51810 | 0.02902 | No |

|     |      |         |         |         |    |
|-----|------|---------|---------|---------|----|
| 77  | C77  | 0.09620 | 0.51810 | 0.22902 | No |
| 78  | C78  | 0.09620 | 0.51810 | 0.42902 | No |
| 79  | C79  | 0.09620 | 0.51810 | 0.62902 | No |
| 80  | C80  | 0.09620 | 0.51810 | 0.82902 | No |
| 81  | C81  | 0.34450 | 0.99030 | 0.10188 | No |
| 82  | C82  | 0.34450 | 0.99030 | 0.30188 | No |
| 83  | C83  | 0.34450 | 0.99030 | 0.50188 | No |
| 84  | C84  | 0.34450 | 0.99030 | 0.70188 | No |
| 85  | C85  | 0.34450 | 0.99030 | 0.90188 | No |
| 86  | C86  | 0.65550 | 0.00970 | 0.00188 | No |
| 87  | C87  | 0.65550 | 0.00970 | 0.20188 | No |
| 88  | C88  | 0.65550 | 0.00970 | 0.40188 | No |
| 89  | C89  | 0.65550 | 0.00970 | 0.60188 | No |
| 90  | C90  | 0.65550 | 0.00970 | 0.80188 | No |
| 91  | C91  | 0.84450 | 0.50970 | 0.10188 | No |
| 92  | C92  | 0.84450 | 0.50970 | 0.30188 | No |
| 93  | C93  | 0.84450 | 0.50970 | 0.50188 | No |
| 94  | C94  | 0.84450 | 0.50970 | 0.70188 | No |
| 95  | C95  | 0.84450 | 0.50970 | 0.90188 | No |
| 96  | C96  | 0.15550 | 0.49030 | 0.00188 | No |
| 97  | C97  | 0.15550 | 0.49030 | 0.20188 | No |
| 98  | C98  | 0.15550 | 0.49030 | 0.40188 | No |
| 99  | C99  | 0.15550 | 0.49030 | 0.60188 | No |
| 100 | C100 | 0.15550 | 0.49030 | 0.80188 | No |
| 101 | C101 | 0.25450 | 0.95520 | 0.11224 | No |
| 102 | C102 | 0.25450 | 0.95520 | 0.31224 | No |
| 103 | C103 | 0.25450 | 0.95520 | 0.51224 | No |
| 104 | C104 | 0.25450 | 0.95520 | 0.71224 | No |
| 105 | C105 | 0.25450 | 0.95520 | 0.91224 | No |
| 106 | C106 | 0.74550 | 0.04480 | 0.01224 | No |
| 107 | C107 | 0.74550 | 0.04480 | 0.21224 | No |
| 108 | C108 | 0.74550 | 0.04480 | 0.41224 | No |
| 109 | C109 | 0.74550 | 0.04480 | 0.61224 | No |
| 110 | C110 | 0.74550 | 0.04480 | 0.81224 | No |
| 111 | C111 | 0.75450 | 0.54480 | 0.11224 | No |
| 112 | C112 | 0.75450 | 0.54480 | 0.31224 | No |
| 113 | C113 | 0.75450 | 0.54480 | 0.51224 | No |
| 114 | C114 | 0.75450 | 0.54480 | 0.71224 | No |

|     |      |         |         |         |    |
|-----|------|---------|---------|---------|----|
| 115 | C115 | 0.75450 | 0.54480 | 0.91224 | No |
| 116 | C116 | 0.24550 | 0.45520 | 0.01224 | No |
| 117 | C117 | 0.24550 | 0.45520 | 0.21224 | No |
| 118 | C118 | 0.24550 | 0.45520 | 0.41224 | No |
| 119 | C119 | 0.24550 | 0.45520 | 0.61224 | No |
| 120 | C120 | 0.24550 | 0.45520 | 0.81224 | No |
| 121 | I1   | 0.48458 | 0.51909 | 0.04212 | No |
| 122 | I2   | 0.48458 | 0.51909 | 0.24212 | No |
| 123 | I3   | 0.48458 | 0.51909 | 0.44212 | No |
| 124 | I4   | 0.48458 | 0.51909 | 0.64212 | No |
| 125 | I5   | 0.48458 | 0.51909 | 0.84212 | No |
| 126 | I6   | 0.51542 | 0.48091 | 0.94212 | No |
| 127 | I7   | 0.51542 | 0.48091 | 0.14212 | No |
| 128 | I8   | 0.51542 | 0.48091 | 0.34212 | No |
| 129 | I9   | 0.51542 | 0.48091 | 0.54212 | No |
| 130 | I10  | 0.51542 | 0.48091 | 0.74212 | No |
| 131 | I11  | 0.98458 | 0.98091 | 0.04212 | No |
| 132 | I12  | 0.98458 | 0.98091 | 0.24212 | No |
| 133 | I13  | 0.98458 | 0.98091 | 0.44212 | No |
| 134 | I14  | 0.98458 | 0.98091 | 0.64212 | No |
| 135 | I15  | 0.98458 | 0.98091 | 0.84212 | No |
| 136 | I16  | 0.01542 | 0.01909 | 0.94212 | No |
| 137 | I17  | 0.01542 | 0.01909 | 0.14212 | No |
| 138 | I18  | 0.01542 | 0.01909 | 0.34212 | No |
| 139 | I19  | 0.01542 | 0.01909 | 0.54212 | No |
| 140 | I20  | 0.01542 | 0.01909 | 0.74212 | No |
| 141 | I21  | 0.25948 | 0.45560 | 0.10194 | No |
| 142 | I22  | 0.25948 | 0.45560 | 0.30194 | No |
| 143 | I23  | 0.25948 | 0.45560 | 0.50194 | No |
| 144 | I24  | 0.25948 | 0.45560 | 0.70194 | No |
| 145 | I25  | 0.25948 | 0.45560 | 0.90194 | No |
| 146 | I26  | 0.74052 | 0.54440 | 0.00194 | No |
| 147 | I27  | 0.74052 | 0.54440 | 0.20194 | No |
| 148 | I28  | 0.74052 | 0.54440 | 0.40194 | No |
| 149 | I29  | 0.74052 | 0.54440 | 0.60194 | No |
| 150 | I30  | 0.74052 | 0.54440 | 0.80194 | No |
| 151 | I31  | 0.75948 | 0.04440 | 0.10194 | No |
| 152 | I32  | 0.75948 | 0.04440 | 0.30194 | No |

|     |     |         |         |         |    |
|-----|-----|---------|---------|---------|----|
| 153 | I33 | 0.75948 | 0.04440 | 0.50194 | No |
| 154 | I34 | 0.75948 | 0.04440 | 0.70194 | No |
| 155 | I35 | 0.75948 | 0.04440 | 0.90194 | No |
| 156 | I36 | 0.24052 | 0.95560 | 0.00194 | No |
| 157 | I37 | 0.24052 | 0.95560 | 0.20194 | No |
| 158 | I38 | 0.24052 | 0.95560 | 0.40194 | No |
| 159 | I39 | 0.24052 | 0.95560 | 0.60194 | No |
| 160 | I40 | 0.24052 | 0.95560 | 0.80194 | No |
| 161 | I41 | 0.29912 | 0.73228 | 0.05329 | No |
| 162 | I42 | 0.29912 | 0.73228 | 0.25329 | No |
| 163 | I43 | 0.29912 | 0.73228 | 0.45329 | No |
| 164 | I44 | 0.29912 | 0.73228 | 0.65329 | No |
| 165 | I45 | 0.29912 | 0.73228 | 0.85329 | No |
| 166 | I46 | 0.70088 | 0.26772 | 0.95329 | No |
| 167 | I47 | 0.70088 | 0.26772 | 0.15329 | No |
| 168 | I48 | 0.70088 | 0.26772 | 0.35329 | No |
| 169 | I49 | 0.70088 | 0.26772 | 0.55329 | No |
| 170 | I50 | 0.70088 | 0.26772 | 0.75329 | No |
| 171 | I51 | 0.79912 | 0.76772 | 0.05329 | No |
| 172 | I52 | 0.79912 | 0.76772 | 0.25329 | No |
| 173 | I53 | 0.79912 | 0.76772 | 0.45329 | No |
| 174 | I54 | 0.79912 | 0.76772 | 0.65329 | No |
| 175 | I55 | 0.79912 | 0.76772 | 0.85329 | No |
| 176 | I56 | 0.20088 | 0.23228 | 0.95329 | No |
| 177 | I57 | 0.20088 | 0.23228 | 0.15329 | No |
| 178 | I58 | 0.20088 | 0.23228 | 0.35329 | No |
| 179 | I59 | 0.20088 | 0.23228 | 0.55329 | No |
| 180 | I60 | 0.20088 | 0.23228 | 0.75329 | No |
| 181 | I61 | 0.30809 | 0.69835 | 0.15768 | No |
| 182 | I62 | 0.30809 | 0.69835 | 0.35768 | No |
| 183 | I63 | 0.30809 | 0.69835 | 0.55768 | No |
| 184 | I64 | 0.30809 | 0.69835 | 0.75768 | No |
| 185 | I65 | 0.30809 | 0.69835 | 0.95768 | No |
| 186 | I66 | 0.69191 | 0.30165 | 0.05768 | No |
| 187 | I67 | 0.69191 | 0.30165 | 0.25768 | No |
| 188 | I68 | 0.69191 | 0.30165 | 0.45768 | No |
| 189 | I69 | 0.69191 | 0.30165 | 0.65768 | No |
| 190 | I70 | 0.69191 | 0.30165 | 0.85768 | No |

|     |      |         |         |         |    |
|-----|------|---------|---------|---------|----|
| 191 | I71  | 0.80809 | 0.80165 | 0.15768 | No |
| 192 | I72  | 0.80809 | 0.80165 | 0.35768 | No |
| 193 | I73  | 0.80809 | 0.80165 | 0.55768 | No |
| 194 | I74  | 0.80809 | 0.80165 | 0.75768 | No |
| 195 | I75  | 0.80809 | 0.80165 | 0.95768 | No |
| 196 | I76  | 0.19191 | 0.19835 | 0.05768 | No |
| 197 | I77  | 0.19191 | 0.19835 | 0.25768 | No |
| 198 | I78  | 0.19191 | 0.19835 | 0.45768 | No |
| 199 | I79  | 0.19191 | 0.19835 | 0.65768 | No |
| 200 | I80  | 0.19191 | 0.19835 | 0.85768 | No |
| 201 | I81  | 0.54645 | 0.76181 | 0.10427 | No |
| 202 | I82  | 0.54645 | 0.76181 | 0.30427 | No |
| 203 | I83  | 0.54645 | 0.76181 | 0.50427 | No |
| 204 | I84  | 0.54645 | 0.76181 | 0.70427 | No |
| 205 | I85  | 0.54645 | 0.76181 | 0.90427 | No |
| 206 | I86  | 0.45355 | 0.23819 | 0.00427 | No |
| 207 | I87  | 0.45355 | 0.23819 | 0.20427 | No |
| 208 | I88  | 0.45355 | 0.23819 | 0.40427 | No |
| 209 | I89  | 0.45355 | 0.23819 | 0.60427 | No |
| 210 | I90  | 0.45355 | 0.23819 | 0.80427 | No |
| 211 | I91  | 0.04645 | 0.73819 | 0.10427 | No |
| 212 | I92  | 0.04645 | 0.73819 | 0.30427 | No |
| 213 | I93  | 0.04645 | 0.73819 | 0.50427 | No |
| 214 | I94  | 0.04645 | 0.73819 | 0.70427 | No |
| 215 | I95  | 0.04645 | 0.73819 | 0.90427 | No |
| 216 | I96  | 0.95355 | 0.26181 | 0.00427 | No |
| 217 | I97  | 0.95355 | 0.26181 | 0.20427 | No |
| 218 | I98  | 0.95355 | 0.26181 | 0.40427 | No |
| 219 | I99  | 0.95355 | 0.26181 | 0.60427 | No |
| 220 | I100 | 0.95355 | 0.26181 | 0.80427 | No |
| 221 | H1   | 0.43960 | 0.27810 | 0.06640 | No |
| 222 | H2   | 0.43960 | 0.27810 | 0.26640 | No |
| 223 | H3   | 0.43960 | 0.27810 | 0.46640 | No |
| 224 | H4   | 0.43960 | 0.27810 | 0.66640 | No |
| 225 | H5   | 0.43960 | 0.27810 | 0.86640 | No |
| 226 | H6   | 0.56040 | 0.72190 | 0.96640 | No |
| 227 | H7   | 0.56040 | 0.72190 | 0.16640 | No |
| 228 | H8   | 0.56040 | 0.72190 | 0.36640 | No |

|     |     |         |         |         |    |
|-----|-----|---------|---------|---------|----|
| 229 | H9  | 0.56040 | 0.72190 | 0.56640 | No |
| 230 | H10 | 0.56040 | 0.72190 | 0.76640 | No |
| 231 | H11 | 0.93960 | 0.22190 | 0.06640 | No |
| 232 | H12 | 0.93960 | 0.22190 | 0.26640 | No |
| 233 | H13 | 0.93960 | 0.22190 | 0.46640 | No |
| 234 | H14 | 0.93960 | 0.22190 | 0.66640 | No |
| 235 | H15 | 0.93960 | 0.22190 | 0.86640 | No |
| 236 | H16 | 0.06040 | 0.77810 | 0.96640 | No |
| 237 | H17 | 0.06040 | 0.77810 | 0.16640 | No |
| 238 | H18 | 0.06040 | 0.77810 | 0.36640 | No |
| 239 | H19 | 0.06040 | 0.77810 | 0.56640 | No |
| 240 | H20 | 0.06040 | 0.77810 | 0.76640 | No |
| 241 | H21 | 0.50570 | 0.32420 | 0.08704 | No |
| 242 | H22 | 0.50570 | 0.32420 | 0.28704 | No |
| 243 | H23 | 0.50570 | 0.32420 | 0.48704 | No |
| 244 | H24 | 0.50570 | 0.32420 | 0.68704 | No |
| 245 | H25 | 0.50570 | 0.32420 | 0.88704 | No |
| 246 | H26 | 0.49430 | 0.67580 | 0.98704 | No |
| 247 | H27 | 0.49430 | 0.67580 | 0.18704 | No |
| 248 | H28 | 0.49430 | 0.67580 | 0.38704 | No |
| 249 | H29 | 0.49430 | 0.67580 | 0.58704 | No |
| 250 | H30 | 0.49430 | 0.67580 | 0.78704 | No |
| 251 | H31 | 0.00570 | 0.17580 | 0.08704 | No |
| 252 | H32 | 0.00570 | 0.17580 | 0.28704 | No |
| 253 | H33 | 0.00570 | 0.17580 | 0.48704 | No |
| 254 | H34 | 0.00570 | 0.17580 | 0.68704 | No |
| 255 | H35 | 0.00570 | 0.17580 | 0.88704 | No |
| 256 | H36 | 0.99430 | 0.82420 | 0.98704 | No |
| 257 | H37 | 0.99430 | 0.82420 | 0.18704 | No |
| 258 | H38 | 0.99430 | 0.82420 | 0.38704 | No |
| 259 | H39 | 0.99430 | 0.82420 | 0.58704 | No |
| 260 | H40 | 0.99430 | 0.82420 | 0.78704 | No |
| 261 | H41 | 0.40970 | 0.34510 | 0.09086 | No |
| 262 | H42 | 0.40970 | 0.34510 | 0.29086 | No |
| 263 | H43 | 0.40970 | 0.34510 | 0.49086 | No |
| 264 | H44 | 0.40970 | 0.34510 | 0.69086 | No |
| 265 | H45 | 0.40970 | 0.34510 | 0.89086 | No |
| 266 | H46 | 0.59030 | 0.65490 | 0.99086 | No |

|     |     |         |         |         |    |
|-----|-----|---------|---------|---------|----|
| 267 | H47 | 0.59030 | 0.65490 | 0.19086 | No |
| 268 | H48 | 0.59030 | 0.65490 | 0.39086 | No |
| 269 | H49 | 0.59030 | 0.65490 | 0.59086 | No |
| 270 | H50 | 0.59030 | 0.65490 | 0.79086 | No |
| 271 | H51 | 0.90970 | 0.15490 | 0.09086 | No |
| 272 | H52 | 0.90970 | 0.15490 | 0.29086 | No |
| 273 | H53 | 0.90970 | 0.15490 | 0.49086 | No |
| 274 | H54 | 0.90970 | 0.15490 | 0.69086 | No |
| 275 | H55 | 0.90970 | 0.15490 | 0.89086 | No |
| 276 | H56 | 0.09030 | 0.84510 | 0.99086 | No |
| 277 | H57 | 0.09030 | 0.84510 | 0.19086 | No |
| 278 | H58 | 0.09030 | 0.84510 | 0.39086 | No |
| 279 | H59 | 0.09030 | 0.84510 | 0.59086 | No |
| 280 | H60 | 0.09030 | 0.84510 | 0.79086 | No |
| 281 | H61 | 0.22060 | 0.90500 | 0.07076 | No |
| 282 | H62 | 0.22060 | 0.90500 | 0.27076 | No |
| 283 | H63 | 0.22060 | 0.90500 | 0.47076 | No |
| 284 | H64 | 0.22060 | 0.90500 | 0.67076 | No |
| 285 | H65 | 0.22060 | 0.90500 | 0.87076 | No |
| 286 | H66 | 0.77940 | 0.09500 | 0.97076 | No |
| 287 | H67 | 0.77940 | 0.09500 | 0.17076 | No |
| 288 | H68 | 0.77940 | 0.09500 | 0.37076 | No |
| 289 | H69 | 0.77940 | 0.09500 | 0.57076 | No |
| 290 | H70 | 0.77940 | 0.09500 | 0.77076 | No |
| 291 | H71 | 0.72060 | 0.59500 | 0.07076 | No |
| 292 | H72 | 0.72060 | 0.59500 | 0.27076 | No |
| 293 | H73 | 0.72060 | 0.59500 | 0.47076 | No |
| 294 | H74 | 0.72060 | 0.59500 | 0.67076 | No |
| 295 | H75 | 0.72060 | 0.59500 | 0.87076 | No |
| 296 | H76 | 0.27940 | 0.40500 | 0.97076 | No |
| 297 | H77 | 0.27940 | 0.40500 | 0.17076 | No |
| 298 | H78 | 0.27940 | 0.40500 | 0.37076 | No |
| 299 | H79 | 0.27940 | 0.40500 | 0.57076 | No |
| 300 | H80 | 0.27940 | 0.40500 | 0.77076 | No |
| 301 | H81 | 0.17940 | 0.99870 | 0.07702 | No |
| 302 | H82 | 0.17940 | 0.99870 | 0.27702 | No |
| 303 | H83 | 0.17940 | 0.99870 | 0.47702 | No |
| 304 | H84 | 0.17940 | 0.99870 | 0.67702 | No |

|     |      |         |         |         |    |
|-----|------|---------|---------|---------|----|
| 305 | H85  | 0.17940 | 0.99870 | 0.87702 | No |
| 306 | H86  | 0.82060 | 0.00130 | 0.97702 | No |
| 307 | H87  | 0.82060 | 0.00130 | 0.17702 | No |
| 308 | H88  | 0.82060 | 0.00130 | 0.37702 | No |
| 309 | H89  | 0.82060 | 0.00130 | 0.57702 | No |
| 310 | H90  | 0.82060 | 0.00130 | 0.77702 | No |
| 311 | H91  | 0.67940 | 0.50130 | 0.07702 | No |
| 312 | H92  | 0.67940 | 0.50130 | 0.27702 | No |
| 313 | H93  | 0.67940 | 0.50130 | 0.47702 | No |
| 314 | H94  | 0.67940 | 0.50130 | 0.67702 | No |
| 315 | H95  | 0.67940 | 0.50130 | 0.87702 | No |
| 316 | H96  | 0.32060 | 0.49870 | 0.97702 | No |
| 317 | H97  | 0.32060 | 0.49870 | 0.17702 | No |
| 318 | H98  | 0.32060 | 0.49870 | 0.37702 | No |
| 319 | H99  | 0.32060 | 0.49870 | 0.57702 | No |
| 320 | H100 | 0.32060 | 0.49870 | 0.77702 | No |
| 321 | H101 | 0.14300 | 0.91200 | 0.09190 | No |
| 322 | H102 | 0.14300 | 0.91200 | 0.29190 | No |
| 323 | H103 | 0.14300 | 0.91200 | 0.49190 | No |
| 324 | H104 | 0.14300 | 0.91200 | 0.69190 | No |
| 325 | H105 | 0.14300 | 0.91200 | 0.89190 | No |
| 326 | H106 | 0.85700 | 0.08800 | 0.99190 | No |
| 327 | H107 | 0.85700 | 0.08800 | 0.19190 | No |
| 328 | H108 | 0.85700 | 0.08800 | 0.39190 | No |
| 329 | H109 | 0.85700 | 0.08800 | 0.59190 | No |
| 330 | H110 | 0.85700 | 0.08800 | 0.79190 | No |
| 331 | H111 | 0.64300 | 0.58800 | 0.09190 | No |
| 332 | H112 | 0.64300 | 0.58800 | 0.29190 | No |
| 333 | H113 | 0.64300 | 0.58800 | 0.49190 | No |
| 334 | H114 | 0.64300 | 0.58800 | 0.69190 | No |
| 335 | H115 | 0.64300 | 0.58800 | 0.89190 | No |
| 336 | H116 | 0.35700 | 0.41200 | 0.99190 | No |
| 337 | H117 | 0.35700 | 0.41200 | 0.19190 | No |
| 338 | H118 | 0.35700 | 0.41200 | 0.39190 | No |
| 339 | H119 | 0.35700 | 0.41200 | 0.59190 | No |
| 340 | H120 | 0.35700 | 0.41200 | 0.79190 | No |
| 341 | H121 | 0.37870 | 0.20070 | 0.11042 | No |
| 342 | H122 | 0.37870 | 0.20070 | 0.31042 | No |



|     |      |         |         |         |    |
|-----|------|---------|---------|---------|----|
| 343 | H123 | 0.37870 | 0.20070 | 0.51042 | No |
| 344 | H124 | 0.37870 | 0.20070 | 0.71042 | No |
| 345 | H125 | 0.37870 | 0.20070 | 0.91042 | No |
| 346 | H126 | 0.62130 | 0.79930 | 0.01042 | No |
| 347 | H127 | 0.62130 | 0.79930 | 0.21042 | No |
| 348 | H128 | 0.62130 | 0.79930 | 0.41042 | No |
| 349 | H129 | 0.62130 | 0.79930 | 0.61042 | No |
| 350 | H130 | 0.62130 | 0.79930 | 0.81042 | No |
| 351 | H131 | 0.87870 | 0.29930 | 0.11042 | No |
| 352 | H132 | 0.87870 | 0.29930 | 0.31042 | No |
| 353 | H133 | 0.87870 | 0.29930 | 0.51042 | No |
| 354 | H134 | 0.87870 | 0.29930 | 0.71042 | No |
| 355 | H135 | 0.87870 | 0.29930 | 0.91042 | No |
| 356 | H136 | 0.12130 | 0.70070 | 0.01042 | No |
| 357 | H137 | 0.12130 | 0.70070 | 0.21042 | No |
| 358 | H138 | 0.12130 | 0.70070 | 0.41042 | No |
| 359 | H139 | 0.12130 | 0.70070 | 0.61042 | No |
| 360 | H140 | 0.12130 | 0.70070 | 0.81042 | No |
| 361 | H141 | 0.46340 | 0.23930 | 0.12906 | No |
| 362 | H142 | 0.46340 | 0.23930 | 0.32906 | No |
| 363 | H143 | 0.46340 | 0.23930 | 0.52906 | No |
| 364 | H144 | 0.46340 | 0.23930 | 0.72906 | No |
| 365 | H145 | 0.46340 | 0.23930 | 0.92906 | No |
| 366 | H146 | 0.53660 | 0.76070 | 0.02906 | No |
| 367 | H147 | 0.53660 | 0.76070 | 0.22906 | No |
| 368 | H148 | 0.53660 | 0.76070 | 0.42906 | No |
| 369 | H149 | 0.53660 | 0.76070 | 0.62906 | No |
| 370 | H150 | 0.53660 | 0.76070 | 0.82906 | No |
| 371 | H151 | 0.96340 | 0.26070 | 0.12906 | No |
| 372 | H152 | 0.96340 | 0.26070 | 0.32906 | No |
| 373 | H153 | 0.96340 | 0.26070 | 0.52906 | No |
| 374 | H154 | 0.96340 | 0.26070 | 0.72906 | No |
| 375 | H155 | 0.96340 | 0.26070 | 0.92906 | No |
| 376 | H156 | 0.03660 | 0.73930 | 0.02906 | No |
| 377 | H157 | 0.03660 | 0.73930 | 0.22906 | No |
| 378 | H158 | 0.03660 | 0.73930 | 0.42906 | No |
| 379 | H159 | 0.03660 | 0.73930 | 0.62906 | No |
| 380 | H160 | 0.03660 | 0.73930 | 0.82906 | No |

|     |      |         |         |         |    |
|-----|------|---------|---------|---------|----|
| 381 | H161 | 0.47240 | 0.11130 | 0.07710 | No |
| 382 | H162 | 0.47240 | 0.11130 | 0.27710 | No |
| 383 | H163 | 0.47240 | 0.11130 | 0.47710 | No |
| 384 | H164 | 0.47240 | 0.11130 | 0.67710 | No |
| 385 | H165 | 0.47240 | 0.11130 | 0.87710 | No |
| 386 | H166 | 0.52760 | 0.88870 | 0.97710 | No |
| 387 | H167 | 0.52760 | 0.88870 | 0.17710 | No |
| 388 | H168 | 0.52760 | 0.88870 | 0.37710 | No |
| 389 | H169 | 0.52760 | 0.88870 | 0.57710 | No |
| 390 | H170 | 0.52760 | 0.88870 | 0.77710 | No |
| 391 | H171 | 0.97240 | 0.38870 | 0.07710 | No |
| 392 | H172 | 0.97240 | 0.38870 | 0.27710 | No |
| 393 | H173 | 0.97240 | 0.38870 | 0.47710 | No |
| 394 | H174 | 0.97240 | 0.38870 | 0.67710 | No |
| 395 | H175 | 0.97240 | 0.38870 | 0.87710 | No |
| 396 | H176 | 0.02760 | 0.61130 | 0.97710 | No |
| 397 | H177 | 0.02760 | 0.61130 | 0.17710 | No |
| 398 | H178 | 0.02760 | 0.61130 | 0.37710 | No |
| 399 | H179 | 0.02760 | 0.61130 | 0.57710 | No |
| 400 | H180 | 0.02760 | 0.61130 | 0.77710 | No |
| 401 | H181 | 0.55860 | 0.15340 | 0.09382 | No |
| 402 | H182 | 0.55860 | 0.15340 | 0.29382 | No |
| 403 | H183 | 0.55860 | 0.15340 | 0.49382 | No |
| 404 | H184 | 0.55860 | 0.15340 | 0.69382 | No |
| 405 | H185 | 0.55860 | 0.15340 | 0.89382 | No |
| 406 | H186 | 0.44140 | 0.84660 | 0.99382 | No |
| 407 | H187 | 0.44140 | 0.84660 | 0.19382 | No |
| 408 | H188 | 0.44140 | 0.84660 | 0.39382 | No |
| 409 | H189 | 0.44140 | 0.84660 | 0.59382 | No |
| 410 | H190 | 0.44140 | 0.84660 | 0.79382 | No |
| 411 | H191 | 0.05860 | 0.34660 | 0.09382 | No |
| 412 | H192 | 0.05860 | 0.34660 | 0.29382 | No |
| 413 | H193 | 0.05860 | 0.34660 | 0.49382 | No |
| 414 | H194 | 0.05860 | 0.34660 | 0.69382 | No |
| 415 | H195 | 0.05860 | 0.34660 | 0.89382 | No |
| 416 | H196 | 0.94140 | 0.65340 | 0.99382 | No |
| 417 | H197 | 0.94140 | 0.65340 | 0.19382 | No |
| 418 | H198 | 0.94140 | 0.65340 | 0.39382 | No |

|     |      |         |         |         |    |
|-----|------|---------|---------|---------|----|
| 419 | H199 | 0.94140 | 0.65340 | 0.59382 | No |
| 420 | H200 | 0.94140 | 0.65340 | 0.79382 | No |
| 421 | H201 | 0.52810 | 0.99740 | 0.11126 | No |
| 422 | H202 | 0.52810 | 0.99740 | 0.31126 | No |
| 423 | H203 | 0.52810 | 0.99740 | 0.51126 | No |
| 424 | H204 | 0.52810 | 0.99740 | 0.71126 | No |
| 425 | H205 | 0.52810 | 0.99740 | 0.91126 | No |
| 426 | H206 | 0.47190 | 0.00260 | 0.01126 | No |
| 427 | H207 | 0.47190 | 0.00260 | 0.21126 | No |
| 428 | H208 | 0.47190 | 0.00260 | 0.41126 | No |
| 429 | H209 | 0.47190 | 0.00260 | 0.61126 | No |
| 430 | H210 | 0.47190 | 0.00260 | 0.81126 | No |
| 431 | H211 | 0.02810 | 0.50260 | 0.11126 | No |
| 432 | H212 | 0.02810 | 0.50260 | 0.31126 | No |
| 433 | H213 | 0.02810 | 0.50260 | 0.51126 | No |
| 434 | H214 | 0.02810 | 0.50260 | 0.71126 | No |
| 435 | H215 | 0.02810 | 0.50260 | 0.91126 | No |
| 436 | H216 | 0.97190 | 0.49740 | 0.01126 | No |
| 437 | H217 | 0.97190 | 0.49740 | 0.21126 | No |
| 438 | H218 | 0.97190 | 0.49740 | 0.41126 | No |
| 439 | H219 | 0.97190 | 0.49740 | 0.61126 | No |
| 440 | H220 | 0.97190 | 0.49740 | 0.81126 | No |
| 441 | H221 | 0.52650 | 0.07110 | 0.13938 | No |
| 442 | H222 | 0.52650 | 0.07110 | 0.33938 | No |
| 443 | H223 | 0.52650 | 0.07110 | 0.53938 | No |
| 444 | H224 | 0.52650 | 0.07110 | 0.73938 | No |
| 445 | H225 | 0.52650 | 0.07110 | 0.93938 | No |
| 446 | H226 | 0.47350 | 0.92890 | 0.03938 | No |
| 447 | H227 | 0.47350 | 0.92890 | 0.23938 | No |
| 448 | H228 | 0.47350 | 0.92890 | 0.43938 | No |
| 449 | H229 | 0.47350 | 0.92890 | 0.63938 | No |
| 450 | H230 | 0.47350 | 0.92890 | 0.83938 | No |
| 451 | H231 | 0.02650 | 0.42890 | 0.13938 | No |
| 452 | H232 | 0.02650 | 0.42890 | 0.33938 | No |
| 453 | H233 | 0.02650 | 0.42890 | 0.53938 | No |
| 454 | H234 | 0.02650 | 0.42890 | 0.73938 | No |
| 455 | H235 | 0.02650 | 0.42890 | 0.93938 | No |
| 456 | H236 | 0.97350 | 0.57110 | 0.03938 | No |

|     |      |         |         |         |    |
|-----|------|---------|---------|---------|----|
| 457 | H237 | 0.97350 | 0.57110 | 0.23938 | No |
| 458 | H238 | 0.97350 | 0.57110 | 0.43938 | No |
| 459 | H239 | 0.97350 | 0.57110 | 0.63938 | No |
| 460 | H240 | 0.97350 | 0.57110 | 0.83938 | No |
| 461 | H241 | 0.37400 | 0.06910 | 0.14084 | No |
| 462 | H242 | 0.37400 | 0.06910 | 0.34084 | No |
| 463 | H243 | 0.37400 | 0.06910 | 0.54084 | No |
| 464 | H244 | 0.37400 | 0.06910 | 0.74084 | No |
| 465 | H245 | 0.37400 | 0.06910 | 0.94084 | No |
| 466 | H246 | 0.62600 | 0.93090 | 0.04084 | No |
| 467 | H247 | 0.62600 | 0.93090 | 0.24084 | No |
| 468 | H248 | 0.62600 | 0.93090 | 0.44084 | No |
| 469 | H249 | 0.62600 | 0.93090 | 0.64084 | No |
| 470 | H250 | 0.62600 | 0.93090 | 0.84084 | No |
| 471 | H251 | 0.87400 | 0.43090 | 0.14084 | No |
| 472 | H252 | 0.87400 | 0.43090 | 0.34084 | No |
| 473 | H253 | 0.87400 | 0.43090 | 0.54084 | No |
| 474 | H254 | 0.87400 | 0.43090 | 0.74084 | No |
| 475 | H255 | 0.87400 | 0.43090 | 0.94084 | No |
| 476 | H256 | 0.12600 | 0.56910 | 0.04084 | No |
| 477 | H257 | 0.12600 | 0.56910 | 0.24084 | No |
| 478 | H258 | 0.12600 | 0.56910 | 0.44084 | No |
| 479 | H259 | 0.12600 | 0.56910 | 0.64084 | No |
| 480 | H260 | 0.12600 | 0.56910 | 0.84084 | No |
| 481 | H261 | 0.40970 | 0.96290 | 0.14300 | No |
| 482 | H262 | 0.40970 | 0.96290 | 0.34300 | No |
| 483 | H263 | 0.40970 | 0.96290 | 0.54300 | No |
| 484 | H264 | 0.40970 | 0.96290 | 0.74300 | No |
| 485 | H265 | 0.40970 | 0.96290 | 0.94300 | No |
| 486 | H266 | 0.59030 | 0.03710 | 0.04300 | No |
| 487 | H267 | 0.59030 | 0.03710 | 0.24300 | No |
| 488 | H268 | 0.59030 | 0.03710 | 0.44300 | No |
| 489 | H269 | 0.59030 | 0.03710 | 0.64300 | No |
| 490 | H270 | 0.59030 | 0.03710 | 0.84300 | No |
| 491 | H271 | 0.90970 | 0.53710 | 0.14300 | No |
| 492 | H272 | 0.90970 | 0.53710 | 0.34300 | No |
| 493 | H273 | 0.90970 | 0.53710 | 0.54300 | No |
| 494 | H274 | 0.90970 | 0.53710 | 0.74300 | No |

|     |      |         |         |         |    |
|-----|------|---------|---------|---------|----|
| 495 | H275 | 0.90970 | 0.53710 | 0.94300 | No |
| 496 | H276 | 0.09030 | 0.46290 | 0.04300 | No |
| 497 | H277 | 0.09030 | 0.46290 | 0.24300 | No |
| 498 | H278 | 0.09030 | 0.46290 | 0.44300 | No |
| 499 | H279 | 0.09030 | 0.46290 | 0.64300 | No |
| 500 | H280 | 0.09030 | 0.46290 | 0.84300 | No |
| 501 | H281 | 0.33640 | 0.04580 | 0.08812 | No |
| 502 | H282 | 0.33640 | 0.04580 | 0.28812 | No |
| 503 | H283 | 0.33640 | 0.04580 | 0.48812 | No |
| 504 | H284 | 0.33640 | 0.04580 | 0.68812 | No |
| 505 | H285 | 0.33640 | 0.04580 | 0.88812 | No |
| 506 | H286 | 0.66360 | 0.95420 | 0.98812 | No |
| 507 | H287 | 0.66360 | 0.95420 | 0.18812 | No |
| 508 | H288 | 0.66360 | 0.95420 | 0.38812 | No |
| 509 | H289 | 0.66360 | 0.95420 | 0.58812 | No |
| 510 | H290 | 0.66360 | 0.95420 | 0.78812 | No |
| 511 | H291 | 0.83640 | 0.45420 | 0.08812 | No |
| 512 | H292 | 0.83640 | 0.45420 | 0.28812 | No |
| 513 | H293 | 0.83640 | 0.45420 | 0.48812 | No |
| 514 | H294 | 0.83640 | 0.45420 | 0.68812 | No |
| 515 | H295 | 0.83640 | 0.45420 | 0.88812 | No |
| 516 | H296 | 0.16360 | 0.54580 | 0.98812 | No |
| 517 | H297 | 0.16360 | 0.54580 | 0.18812 | No |
| 518 | H298 | 0.16360 | 0.54580 | 0.38812 | No |
| 519 | H299 | 0.16360 | 0.54580 | 0.58812 | No |
| 520 | H300 | 0.16360 | 0.54580 | 0.78812 | No |
| 521 | H301 | 0.37410 | 0.93990 | 0.08970 | No |
| 522 | H302 | 0.37410 | 0.93990 | 0.28970 | No |
| 523 | H303 | 0.37410 | 0.93990 | 0.48970 | No |
| 524 | H304 | 0.37410 | 0.93990 | 0.68970 | No |
| 525 | H305 | 0.37410 | 0.93990 | 0.88970 | No |
| 526 | H306 | 0.62590 | 0.06010 | 0.98970 | No |
| 527 | H307 | 0.62590 | 0.06010 | 0.18970 | No |
| 528 | H308 | 0.62590 | 0.06010 | 0.38970 | No |
| 529 | H309 | 0.62590 | 0.06010 | 0.58970 | No |
| 530 | H310 | 0.62590 | 0.06010 | 0.78970 | No |
| 531 | H311 | 0.87410 | 0.56010 | 0.08970 | No |
| 532 | H312 | 0.87410 | 0.56010 | 0.28970 | No |

|     |      |         |         |         |    |
|-----|------|---------|---------|---------|----|
| 533 | H313 | 0.87410 | 0.56010 | 0.48970 | No |
| 534 | H314 | 0.87410 | 0.56010 | 0.68970 | No |
| 535 | H315 | 0.87410 | 0.56010 | 0.88970 | No |
| 536 | H316 | 0.12590 | 0.43990 | 0.98970 | No |
| 537 | H317 | 0.12590 | 0.43990 | 0.18970 | No |
| 538 | H318 | 0.12590 | 0.43990 | 0.38970 | No |
| 539 | H319 | 0.12590 | 0.43990 | 0.58970 | No |
| 540 | H320 | 0.12590 | 0.43990 | 0.78970 | No |
| 541 | H321 | 0.26160 | 0.89450 | 0.12342 | No |
| 542 | H322 | 0.26160 | 0.89450 | 0.32342 | No |
| 543 | H323 | 0.26160 | 0.89450 | 0.52342 | No |
| 544 | H324 | 0.26160 | 0.89450 | 0.72342 | No |
| 545 | H325 | 0.26160 | 0.89450 | 0.92342 | No |
| 546 | H326 | 0.73840 | 0.10550 | 0.02342 | No |
| 547 | H327 | 0.73840 | 0.10550 | 0.22342 | No |
| 548 | H328 | 0.73840 | 0.10550 | 0.42342 | No |
| 549 | H329 | 0.73840 | 0.10550 | 0.62342 | No |
| 550 | H330 | 0.73840 | 0.10550 | 0.82342 | No |
| 551 | H331 | 0.76160 | 0.60550 | 0.12342 | No |
| 552 | H332 | 0.76160 | 0.60550 | 0.32342 | No |
| 553 | H333 | 0.76160 | 0.60550 | 0.52342 | No |
| 554 | H334 | 0.76160 | 0.60550 | 0.72342 | No |
| 555 | H335 | 0.76160 | 0.60550 | 0.92342 | No |
| 556 | H336 | 0.23840 | 0.39450 | 0.02342 | No |
| 557 | H337 | 0.23840 | 0.39450 | 0.22342 | No |
| 558 | H338 | 0.23840 | 0.39450 | 0.42342 | No |
| 559 | H339 | 0.23840 | 0.39450 | 0.62342 | No |
| 560 | H340 | 0.23840 | 0.39450 | 0.82342 | No |
| 561 | H341 | 0.22810 | 0.00160 | 0.12678 | No |
| 562 | H342 | 0.22810 | 0.00160 | 0.32678 | No |
| 563 | H343 | 0.22810 | 0.00160 | 0.52678 | No |
| 564 | H344 | 0.22810 | 0.00160 | 0.72678 | No |
| 565 | H345 | 0.22810 | 0.00160 | 0.92678 | No |
| 566 | H346 | 0.77190 | 0.99840 | 0.02678 | No |
| 567 | H347 | 0.77190 | 0.99840 | 0.22678 | No |
| 568 | H348 | 0.77190 | 0.99840 | 0.42678 | No |
| 569 | H349 | 0.77190 | 0.99840 | 0.62678 | No |
| 570 | H350 | 0.77190 | 0.99840 | 0.82678 | No |

|     |      |         |         |         |    |
|-----|------|---------|---------|---------|----|
| 571 | H351 | 0.72810 | 0.49840 | 0.12678 | No |
| 572 | H352 | 0.72810 | 0.49840 | 0.32678 | No |
| 573 | H353 | 0.72810 | 0.49840 | 0.52678 | No |
| 574 | H354 | 0.72810 | 0.49840 | 0.72678 | No |
| 575 | H355 | 0.72810 | 0.49840 | 0.92678 | No |
| 576 | H356 | 0.27190 | 0.50160 | 0.02678 | No |
| 577 | H357 | 0.27190 | 0.50160 | 0.22678 | No |
| 578 | H358 | 0.27190 | 0.50160 | 0.42678 | No |
| 579 | H359 | 0.27190 | 0.50160 | 0.62678 | No |
| 580 | H360 | 0.27190 | 0.50160 | 0.82678 | No |
| 581 | Bi1  | 0.38917 | 0.62103 | 0.30063 | No |
| 582 | Bi2  | 0.38917 | 0.62103 | 0.50063 | No |
| 583 | Bi3  | 0.38917 | 0.62103 | 0.70063 | No |
| 584 | Bi4  | 0.61083 | 0.37897 | 0.40063 | No |
| 585 | Bi5  | 0.61083 | 0.37897 | 0.80063 | No |
| 586 | Bi6  | 0.88917 | 0.87897 | 0.10063 | No |
| 587 | Bi7  | 0.88917 | 0.87897 | 0.30063 | No |
| 588 | Bi8  | 0.88917 | 0.87897 | 0.70063 | No |
| 589 | Bi9  | 0.11083 | 0.12103 | 0.60063 | No |
| 590 | Bi10 | 0.11083 | 0.12103 | 0.80063 | No |
| 591 | N1   | 0.45000 | 0.29950 | 0.08598 | No |
| 592 | N2   | 0.45000 | 0.29950 | 0.28598 | No |
| 593 | N3   | 0.45000 | 0.29950 | 0.48598 | No |
| 594 | N4   | 0.45000 | 0.29950 | 0.68598 | No |
| 595 | N5   | 0.45000 | 0.29950 | 0.88598 | No |
| 596 | N6   | 0.55000 | 0.70050 | 0.98598 | No |
| 597 | N7   | 0.55000 | 0.70050 | 0.18598 | No |
| 598 | N8   | 0.55000 | 0.70050 | 0.38598 | No |
| 599 | N9   | 0.55000 | 0.70050 | 0.58598 | No |
| 600 | N10  | 0.55000 | 0.70050 | 0.78598 | No |
| 601 | N11  | 0.95000 | 0.20050 | 0.08598 | No |
| 602 | N12  | 0.95000 | 0.20050 | 0.28598 | No |
| 603 | N13  | 0.95000 | 0.20050 | 0.48598 | No |
| 604 | N14  | 0.95000 | 0.20050 | 0.68598 | No |
| 605 | N15  | 0.95000 | 0.20050 | 0.88598 | No |
| 606 | N16  | 0.05000 | 0.79950 | 0.98598 | No |
| 607 | N17  | 0.05000 | 0.79950 | 0.18598 | No |
| 608 | N18  | 0.05000 | 0.79950 | 0.38598 | No |

|     |      |         |         |         |    |
|-----|------|---------|---------|---------|----|
| 609 | N19  | 0.05000 | 0.79950 | 0.58598 | No |
| 610 | N20  | 0.05000 | 0.79950 | 0.78598 | No |
| 611 | N21  | 0.19340 | 0.94140 | 0.08536 | No |
| 612 | N22  | 0.19340 | 0.94140 | 0.28536 | No |
| 613 | N23  | 0.19340 | 0.94140 | 0.48536 | No |
| 614 | N24  | 0.19340 | 0.94140 | 0.68536 | No |
| 615 | N25  | 0.19340 | 0.94140 | 0.88536 | No |
| 616 | N26  | 0.80660 | 0.05860 | 0.98536 | No |
| 617 | N27  | 0.80660 | 0.05860 | 0.18536 | No |
| 618 | N28  | 0.80660 | 0.05860 | 0.38536 | No |
| 619 | N29  | 0.80660 | 0.05860 | 0.58536 | No |
| 620 | N30  | 0.80660 | 0.05860 | 0.78536 | No |
| 621 | N31  | 0.69340 | 0.55860 | 0.08536 | No |
| 622 | N32  | 0.69340 | 0.55860 | 0.28536 | No |
| 623 | N33  | 0.69340 | 0.55860 | 0.48536 | No |
| 624 | N34  | 0.69340 | 0.55860 | 0.68536 | No |
| 625 | N35  | 0.69340 | 0.55860 | 0.88536 | No |
| 626 | N36  | 0.30660 | 0.44140 | 0.98536 | No |
| 627 | N37  | 0.30660 | 0.44140 | 0.18536 | No |
| 628 | N38  | 0.30660 | 0.44140 | 0.38536 | No |
| 629 | N39  | 0.30660 | 0.44140 | 0.58536 | No |
| 630 | N40  | 0.30660 | 0.44140 | 0.78536 | No |
| 631 | Sb1  | 0.38917 | 0.62103 | 0.10063 | No |
| 632 | Sb2  | 0.38917 | 0.62103 | 0.90063 | No |
| 633 | Sb3  | 0.61083 | 0.37897 | 0.00063 | No |
| 634 | Sb4  | 0.61083 | 0.37897 | 0.20063 | No |
| 635 | Sb5  | 0.61083 | 0.37897 | 0.60063 | No |
| 636 | Sb6  | 0.88917 | 0.87897 | 0.50063 | No |
| 637 | Sb7  | 0.88917 | 0.87897 | 0.90063 | No |
| 638 | Sb8  | 0.11083 | 0.12103 | 0.00063 | No |
| 639 | Sb9  | 0.11083 | 0.12103 | 0.20063 | No |
| 640 | Sb10 | 0.11083 | 0.12103 | 0.40063 | No |

## Reflex Summary Report for Rietveld Refinement of 0.4[C<sub>6</sub>N<sub>2</sub>H<sub>18</sub>]BiI<sub>5</sub>+0.6[C<sub>6</sub>N<sub>2</sub>H<sub>18</sub>]SbI<sub>5</sub>:

### Lattice Parameters

Lattice Type: Triclinic Space Group: P 1

| Parameter | Value              | Refined? |
|-----------|--------------------|----------|
| a         | 15.32406 ± 0.09336 | Yes      |



|   |                    |     |
|---|--------------------|-----|
| b | 14.12210 ± 0.08511 | Yes |
| c | 43.83108 ± 0.26982 | Yes |
| α | 95.15920 ± 0.03655 | Yes |
| β | 87.56013 ± 0.03976 | Yes |
| γ | 90.13525 ± 0.05396 | Yes |

#### Structure Parameters

Refined Motion Groups: 0 Refined Torsions: 0

Refined Angles: 0 Refined Distances: 0

Number of Refined DOF: 0

#### Fractional Coordinates

| No. | Name | u       | v       | w       | Refined? |
|-----|------|---------|---------|---------|----------|
| 1   | C1   | 0.44190 | 0.21900 | 0.10840 | No       |
| 2   | C2   | 0.44190 | 0.21900 | 0.30840 | No       |
| 3   | C3   | 0.44190 | 0.21900 | 0.50840 | No       |
| 4   | C4   | 0.44190 | 0.21900 | 0.70840 | No       |
| 5   | C5   | 0.44190 | 0.21900 | 0.90840 | No       |
| 6   | C6   | 0.55810 | 0.78100 | 0.00840 | No       |
| 7   | C7   | 0.55810 | 0.78100 | 0.20840 | No       |
| 8   | C8   | 0.55810 | 0.78100 | 0.40840 | No       |
| 9   | C9   | 0.55810 | 0.78100 | 0.60840 | No       |
| 10  | C10  | 0.55810 | 0.78100 | 0.80840 | No       |
| 11  | C11  | 0.94190 | 0.28100 | 0.10840 | No       |
| 12  | C12  | 0.94190 | 0.28100 | 0.30840 | No       |
| 13  | C13  | 0.94190 | 0.28100 | 0.50840 | No       |
| 14  | C14  | 0.94190 | 0.28100 | 0.70840 | No       |
| 15  | C15  | 0.94190 | 0.28100 | 0.90840 | No       |
| 16  | C16  | 0.05810 | 0.71900 | 0.00840 | No       |
| 17  | C17  | 0.05810 | 0.71900 | 0.20840 | No       |
| 18  | C18  | 0.05810 | 0.71900 | 0.40840 | No       |
| 19  | C19  | 0.05810 | 0.71900 | 0.60840 | No       |
| 20  | C20  | 0.05810 | 0.71900 | 0.80840 | No       |
| 21  | C21  | 0.49640 | 0.13340 | 0.09722 | No       |
| 22  | C22  | 0.49640 | 0.13340 | 0.29722 | No       |
| 23  | C23  | 0.49640 | 0.13340 | 0.49722 | No       |
| 24  | C24  | 0.49640 | 0.13340 | 0.69722 | No       |
| 25  | C25  | 0.49640 | 0.13340 | 0.89722 | No       |
| 26  | C26  | 0.50360 | 0.86660 | 0.99722 | No       |

|    |     |         |         |         |    |
|----|-----|---------|---------|---------|----|
| 27 | C27 | 0.50360 | 0.86660 | 0.19722 | No |
| 28 | C28 | 0.50360 | 0.86660 | 0.39722 | No |
| 29 | C29 | 0.50360 | 0.86660 | 0.59722 | No |
| 30 | C30 | 0.50360 | 0.86660 | 0.79722 | No |
| 31 | C31 | 0.99640 | 0.36660 | 0.09722 | No |
| 32 | C32 | 0.99640 | 0.36660 | 0.29722 | No |
| 33 | C33 | 0.99640 | 0.36660 | 0.49722 | No |
| 34 | C34 | 0.99640 | 0.36660 | 0.69722 | No |
| 35 | C35 | 0.99640 | 0.36660 | 0.89722 | No |
| 36 | C36 | 0.00360 | 0.63340 | 0.99722 | No |
| 37 | C37 | 0.00360 | 0.63340 | 0.19722 | No |
| 38 | C38 | 0.00360 | 0.63340 | 0.39722 | No |
| 39 | C39 | 0.00360 | 0.63340 | 0.59722 | No |
| 40 | C40 | 0.00360 | 0.63340 | 0.79722 | No |
| 41 | C41 | 0.49500 | 0.05130 | 0.12030 | No |
| 42 | C42 | 0.49500 | 0.05130 | 0.32030 | No |
| 43 | C43 | 0.49500 | 0.05130 | 0.52030 | No |
| 44 | C44 | 0.49500 | 0.05130 | 0.72030 | No |
| 45 | C45 | 0.49500 | 0.05130 | 0.92030 | No |
| 46 | C46 | 0.50500 | 0.94870 | 0.02030 | No |
| 47 | C47 | 0.50500 | 0.94870 | 0.22030 | No |
| 48 | C48 | 0.50500 | 0.94870 | 0.42030 | No |
| 49 | C49 | 0.50500 | 0.94870 | 0.62030 | No |
| 50 | C50 | 0.50500 | 0.94870 | 0.82030 | No |
| 51 | C51 | 0.99500 | 0.44870 | 0.12030 | No |
| 52 | C52 | 0.99500 | 0.44870 | 0.32030 | No |
| 53 | C53 | 0.99500 | 0.44870 | 0.52030 | No |
| 54 | C54 | 0.99500 | 0.44870 | 0.72030 | No |
| 55 | C55 | 0.99500 | 0.44870 | 0.92030 | No |
| 56 | C56 | 0.00500 | 0.55130 | 0.02030 | No |
| 57 | C57 | 0.00500 | 0.55130 | 0.22030 | No |
| 58 | C58 | 0.00500 | 0.55130 | 0.42030 | No |
| 59 | C59 | 0.00500 | 0.55130 | 0.62030 | No |
| 60 | C60 | 0.00500 | 0.55130 | 0.82030 | No |
| 61 | C61 | 0.40380 | 0.01810 | 0.12902 | No |
| 62 | C62 | 0.40380 | 0.01810 | 0.32902 | No |
| 63 | C63 | 0.40380 | 0.01810 | 0.52902 | No |
| 64 | C64 | 0.40380 | 0.01810 | 0.72902 | No |

|     |      |         |         |         |    |
|-----|------|---------|---------|---------|----|
| 65  | C65  | 0.40380 | 0.01810 | 0.92902 | No |
| 66  | C66  | 0.59620 | 0.98190 | 0.02902 | No |
| 67  | C67  | 0.59620 | 0.98190 | 0.22902 | No |
| 68  | C68  | 0.59620 | 0.98190 | 0.42902 | No |
| 69  | C69  | 0.59620 | 0.98190 | 0.62902 | No |
| 70  | C70  | 0.59620 | 0.98190 | 0.82902 | No |
| 71  | C71  | 0.90380 | 0.48190 | 0.12902 | No |
| 72  | C72  | 0.90380 | 0.48190 | 0.32902 | No |
| 73  | C73  | 0.90380 | 0.48190 | 0.52902 | No |
| 74  | C74  | 0.90380 | 0.48190 | 0.72902 | No |
| 75  | C75  | 0.90380 | 0.48190 | 0.92902 | No |
| 76  | C76  | 0.09620 | 0.51810 | 0.02902 | No |
| 77  | C77  | 0.09620 | 0.51810 | 0.22902 | No |
| 78  | C78  | 0.09620 | 0.51810 | 0.42902 | No |
| 79  | C79  | 0.09620 | 0.51810 | 0.62902 | No |
| 80  | C80  | 0.09620 | 0.51810 | 0.82902 | No |
| 81  | C81  | 0.34450 | 0.99030 | 0.10188 | No |
| 82  | C82  | 0.34450 | 0.99030 | 0.30188 | No |
| 83  | C83  | 0.34450 | 0.99030 | 0.50188 | No |
| 84  | C84  | 0.34450 | 0.99030 | 0.70188 | No |
| 85  | C85  | 0.34450 | 0.99030 | 0.90188 | No |
| 86  | C86  | 0.65550 | 0.00970 | 0.00188 | No |
| 87  | C87  | 0.65550 | 0.00970 | 0.20188 | No |
| 88  | C88  | 0.65550 | 0.00970 | 0.40188 | No |
| 89  | C89  | 0.65550 | 0.00970 | 0.60188 | No |
| 90  | C90  | 0.65550 | 0.00970 | 0.80188 | No |
| 91  | C91  | 0.84450 | 0.50970 | 0.10188 | No |
| 92  | C92  | 0.84450 | 0.50970 | 0.30188 | No |
| 93  | C93  | 0.84450 | 0.50970 | 0.50188 | No |
| 94  | C94  | 0.84450 | 0.50970 | 0.70188 | No |
| 95  | C95  | 0.84450 | 0.50970 | 0.90188 | No |
| 96  | C96  | 0.15550 | 0.49030 | 0.00188 | No |
| 97  | C97  | 0.15550 | 0.49030 | 0.20188 | No |
| 98  | C98  | 0.15550 | 0.49030 | 0.40188 | No |
| 99  | C99  | 0.15550 | 0.49030 | 0.60188 | No |
| 100 | C100 | 0.15550 | 0.49030 | 0.80188 | No |
| 101 | C101 | 0.25450 | 0.95520 | 0.11224 | No |
| 102 | C102 | 0.25450 | 0.95520 | 0.31224 | No |

|     |      |         |         |         |    |
|-----|------|---------|---------|---------|----|
| 103 | C103 | 0.25450 | 0.95520 | 0.51224 | No |
| 104 | C104 | 0.25450 | 0.95520 | 0.71224 | No |
| 105 | C105 | 0.25450 | 0.95520 | 0.91224 | No |
| 106 | C106 | 0.74550 | 0.04480 | 0.01224 | No |
| 107 | C107 | 0.74550 | 0.04480 | 0.21224 | No |
| 108 | C108 | 0.74550 | 0.04480 | 0.41224 | No |
| 109 | C109 | 0.74550 | 0.04480 | 0.61224 | No |
| 110 | C110 | 0.74550 | 0.04480 | 0.81224 | No |
| 111 | C111 | 0.75450 | 0.54480 | 0.11224 | No |
| 112 | C112 | 0.75450 | 0.54480 | 0.31224 | No |
| 113 | C113 | 0.75450 | 0.54480 | 0.51224 | No |
| 114 | C114 | 0.75450 | 0.54480 | 0.71224 | No |
| 115 | C115 | 0.75450 | 0.54480 | 0.91224 | No |
| 116 | C116 | 0.24550 | 0.45520 | 0.01224 | No |
| 117 | C117 | 0.24550 | 0.45520 | 0.21224 | No |
| 118 | C118 | 0.24550 | 0.45520 | 0.41224 | No |
| 119 | C119 | 0.24550 | 0.45520 | 0.61224 | No |
| 120 | C120 | 0.24550 | 0.45520 | 0.81224 | No |
| 121 | I1   | 0.48458 | 0.51909 | 0.04212 | No |
| 122 | I2   | 0.48458 | 0.51909 | 0.24212 | No |
| 123 | I3   | 0.48458 | 0.51909 | 0.44212 | No |
| 124 | I4   | 0.48458 | 0.51909 | 0.64212 | No |
| 125 | I5   | 0.48458 | 0.51909 | 0.84212 | No |
| 126 | I6   | 0.51542 | 0.48091 | 0.94212 | No |
| 127 | I7   | 0.51542 | 0.48091 | 0.14212 | No |
| 128 | I8   | 0.51542 | 0.48091 | 0.34212 | No |
| 129 | I9   | 0.51542 | 0.48091 | 0.54212 | No |
| 130 | I10  | 0.51542 | 0.48091 | 0.74212 | No |
| 131 | I11  | 0.98458 | 0.98091 | 0.04212 | No |
| 132 | I12  | 0.98458 | 0.98091 | 0.24212 | No |
| 133 | I13  | 0.98458 | 0.98091 | 0.44212 | No |
| 134 | I14  | 0.98458 | 0.98091 | 0.64212 | No |
| 135 | I15  | 0.98458 | 0.98091 | 0.84212 | No |
| 136 | I16  | 0.01542 | 0.01909 | 0.94212 | No |
| 137 | I17  | 0.01542 | 0.01909 | 0.14212 | No |
| 138 | I18  | 0.01542 | 0.01909 | 0.34212 | No |
| 139 | I19  | 0.01542 | 0.01909 | 0.54212 | No |
| 140 | I20  | 0.01542 | 0.01909 | 0.74212 | No |

|     |     |         |         |         |    |
|-----|-----|---------|---------|---------|----|
| 141 | I21 | 0.25948 | 0.45560 | 0.10194 | No |
| 142 | I22 | 0.25948 | 0.45560 | 0.30194 | No |
| 143 | I23 | 0.25948 | 0.45560 | 0.50194 | No |
| 144 | I24 | 0.25948 | 0.45560 | 0.70194 | No |
| 145 | I25 | 0.25948 | 0.45560 | 0.90194 | No |
| 146 | I26 | 0.74052 | 0.54440 | 0.00194 | No |
| 147 | I27 | 0.74052 | 0.54440 | 0.20194 | No |
| 148 | I28 | 0.74052 | 0.54440 | 0.40194 | No |
| 149 | I29 | 0.74052 | 0.54440 | 0.60194 | No |
| 150 | I30 | 0.74052 | 0.54440 | 0.80194 | No |
| 151 | I31 | 0.75948 | 0.04440 | 0.10194 | No |
| 152 | I32 | 0.75948 | 0.04440 | 0.30194 | No |
| 153 | I33 | 0.75948 | 0.04440 | 0.50194 | No |
| 154 | I34 | 0.75948 | 0.04440 | 0.70194 | No |
| 155 | I35 | 0.75948 | 0.04440 | 0.90194 | No |
| 156 | I36 | 0.24052 | 0.95560 | 0.00194 | No |
| 157 | I37 | 0.24052 | 0.95560 | 0.20194 | No |
| 158 | I38 | 0.24052 | 0.95560 | 0.40194 | No |
| 159 | I39 | 0.24052 | 0.95560 | 0.60194 | No |
| 160 | I40 | 0.24052 | 0.95560 | 0.80194 | No |
| 161 | I41 | 0.29912 | 0.73228 | 0.05329 | No |
| 162 | I42 | 0.29912 | 0.73228 | 0.25329 | No |
| 163 | I43 | 0.29912 | 0.73228 | 0.45329 | No |
| 164 | I44 | 0.29912 | 0.73228 | 0.65329 | No |
| 165 | I45 | 0.29912 | 0.73228 | 0.85329 | No |
| 166 | I46 | 0.70088 | 0.26772 | 0.95329 | No |
| 167 | I47 | 0.70088 | 0.26772 | 0.15329 | No |
| 168 | I48 | 0.70088 | 0.26772 | 0.35329 | No |
| 169 | I49 | 0.70088 | 0.26772 | 0.55329 | No |
| 170 | I50 | 0.70088 | 0.26772 | 0.75329 | No |
| 171 | I51 | 0.79912 | 0.76772 | 0.05329 | No |
| 172 | I52 | 0.79912 | 0.76772 | 0.25329 | No |
| 173 | I53 | 0.79912 | 0.76772 | 0.45329 | No |
| 174 | I54 | 0.79912 | 0.76772 | 0.65329 | No |
| 175 | I55 | 0.79912 | 0.76772 | 0.85329 | No |
| 176 | I56 | 0.20088 | 0.23228 | 0.95329 | No |
| 177 | I57 | 0.20088 | 0.23228 | 0.15329 | No |
| 178 | I58 | 0.20088 | 0.23228 | 0.35329 | No |

|     |     |         |         |         |    |
|-----|-----|---------|---------|---------|----|
| 179 | I59 | 0.20088 | 0.23228 | 0.55329 | No |
| 180 | I60 | 0.20088 | 0.23228 | 0.75329 | No |
| 181 | I61 | 0.30809 | 0.69835 | 0.15768 | No |
| 182 | I62 | 0.30809 | 0.69835 | 0.35768 | No |
| 183 | I63 | 0.30809 | 0.69835 | 0.55768 | No |
| 184 | I64 | 0.30809 | 0.69835 | 0.75768 | No |
| 185 | I65 | 0.30809 | 0.69835 | 0.95768 | No |
| 186 | I66 | 0.69191 | 0.30165 | 0.05768 | No |
| 187 | I67 | 0.69191 | 0.30165 | 0.25768 | No |
| 188 | I68 | 0.69191 | 0.30165 | 0.45768 | No |
| 189 | I69 | 0.69191 | 0.30165 | 0.65768 | No |
| 190 | I70 | 0.69191 | 0.30165 | 0.85768 | No |
| 191 | I71 | 0.80809 | 0.80165 | 0.15768 | No |
| 192 | I72 | 0.80809 | 0.80165 | 0.35768 | No |
| 193 | I73 | 0.80809 | 0.80165 | 0.55768 | No |
| 194 | I74 | 0.80809 | 0.80165 | 0.75768 | No |
| 195 | I75 | 0.80809 | 0.80165 | 0.95768 | No |
| 196 | I76 | 0.19191 | 0.19835 | 0.05768 | No |
| 197 | I77 | 0.19191 | 0.19835 | 0.25768 | No |
| 198 | I78 | 0.19191 | 0.19835 | 0.45768 | No |
| 199 | I79 | 0.19191 | 0.19835 | 0.65768 | No |
| 200 | I80 | 0.19191 | 0.19835 | 0.85768 | No |
| 201 | I81 | 0.54645 | 0.76181 | 0.10427 | No |
| 202 | I82 | 0.54645 | 0.76181 | 0.30427 | No |
| 203 | I83 | 0.54645 | 0.76181 | 0.50427 | No |
| 204 | I84 | 0.54645 | 0.76181 | 0.70427 | No |
| 205 | I85 | 0.54645 | 0.76181 | 0.90427 | No |
| 206 | I86 | 0.45355 | 0.23819 | 0.00427 | No |
| 207 | I87 | 0.45355 | 0.23819 | 0.20427 | No |
| 208 | I88 | 0.45355 | 0.23819 | 0.40427 | No |
| 209 | I89 | 0.45355 | 0.23819 | 0.60427 | No |
| 210 | I90 | 0.45355 | 0.23819 | 0.80427 | No |
| 211 | I91 | 0.04645 | 0.73819 | 0.10427 | No |
| 212 | I92 | 0.04645 | 0.73819 | 0.30427 | No |
| 213 | I93 | 0.04645 | 0.73819 | 0.50427 | No |
| 214 | I94 | 0.04645 | 0.73819 | 0.70427 | No |
| 215 | I95 | 0.04645 | 0.73819 | 0.90427 | No |
| 216 | I96 | 0.95355 | 0.26181 | 0.00427 | No |

|     |      |         |         |         |    |
|-----|------|---------|---------|---------|----|
| 217 | I97  | 0.95355 | 0.26181 | 0.20427 | No |
| 218 | I98  | 0.95355 | 0.26181 | 0.40427 | No |
| 219 | I99  | 0.95355 | 0.26181 | 0.60427 | No |
| 220 | I100 | 0.95355 | 0.26181 | 0.80427 | No |
| 221 | H1   | 0.43960 | 0.27810 | 0.06640 | No |
| 222 | H2   | 0.43960 | 0.27810 | 0.26640 | No |
| 223 | H3   | 0.43960 | 0.27810 | 0.46640 | No |
| 224 | H4   | 0.43960 | 0.27810 | 0.66640 | No |
| 225 | H5   | 0.43960 | 0.27810 | 0.86640 | No |
| 226 | H6   | 0.56040 | 0.72190 | 0.96640 | No |
| 227 | H7   | 0.56040 | 0.72190 | 0.16640 | No |
| 228 | H8   | 0.56040 | 0.72190 | 0.36640 | No |
| 229 | H9   | 0.56040 | 0.72190 | 0.56640 | No |
| 230 | H10  | 0.56040 | 0.72190 | 0.76640 | No |
| 231 | H11  | 0.93960 | 0.22190 | 0.06640 | No |
| 232 | H12  | 0.93960 | 0.22190 | 0.26640 | No |
| 233 | H13  | 0.93960 | 0.22190 | 0.46640 | No |
| 234 | H14  | 0.93960 | 0.22190 | 0.66640 | No |
| 235 | H15  | 0.93960 | 0.22190 | 0.86640 | No |
| 236 | H16  | 0.06040 | 0.77810 | 0.96640 | No |
| 237 | H17  | 0.06040 | 0.77810 | 0.16640 | No |
| 238 | H18  | 0.06040 | 0.77810 | 0.36640 | No |
| 239 | H19  | 0.06040 | 0.77810 | 0.56640 | No |
| 240 | H20  | 0.06040 | 0.77810 | 0.76640 | No |
| 241 | H21  | 0.50570 | 0.32420 | 0.08704 | No |
| 242 | H22  | 0.50570 | 0.32420 | 0.28704 | No |
| 243 | H23  | 0.50570 | 0.32420 | 0.48704 | No |
| 244 | H24  | 0.50570 | 0.32420 | 0.68704 | No |
| 245 | H25  | 0.50570 | 0.32420 | 0.88704 | No |
| 246 | H26  | 0.49430 | 0.67580 | 0.98704 | No |
| 247 | H27  | 0.49430 | 0.67580 | 0.18704 | No |
| 248 | H28  | 0.49430 | 0.67580 | 0.38704 | No |
| 249 | H29  | 0.49430 | 0.67580 | 0.58704 | No |
| 250 | H30  | 0.49430 | 0.67580 | 0.78704 | No |
| 251 | H31  | 0.00570 | 0.17580 | 0.08704 | No |
| 252 | H32  | 0.00570 | 0.17580 | 0.28704 | No |
| 253 | H33  | 0.00570 | 0.17580 | 0.48704 | No |
| 254 | H34  | 0.00570 | 0.17580 | 0.68704 | No |

|     |     |         |         |         |    |
|-----|-----|---------|---------|---------|----|
| 255 | H35 | 0.00570 | 0.17580 | 0.88704 | No |
| 256 | H36 | 0.99430 | 0.82420 | 0.98704 | No |
| 257 | H37 | 0.99430 | 0.82420 | 0.18704 | No |
| 258 | H38 | 0.99430 | 0.82420 | 0.38704 | No |
| 259 | H39 | 0.99430 | 0.82420 | 0.58704 | No |
| 260 | H40 | 0.99430 | 0.82420 | 0.78704 | No |
| 261 | H41 | 0.40970 | 0.34510 | 0.09086 | No |
| 262 | H42 | 0.40970 | 0.34510 | 0.29086 | No |
| 263 | H43 | 0.40970 | 0.34510 | 0.49086 | No |
| 264 | H44 | 0.40970 | 0.34510 | 0.69086 | No |
| 265 | H45 | 0.40970 | 0.34510 | 0.89086 | No |
| 266 | H46 | 0.59030 | 0.65490 | 0.99086 | No |
| 267 | H47 | 0.59030 | 0.65490 | 0.19086 | No |
| 268 | H48 | 0.59030 | 0.65490 | 0.39086 | No |
| 269 | H49 | 0.59030 | 0.65490 | 0.59086 | No |
| 270 | H50 | 0.59030 | 0.65490 | 0.79086 | No |
| 271 | H51 | 0.90970 | 0.15490 | 0.09086 | No |
| 272 | H52 | 0.90970 | 0.15490 | 0.29086 | No |
| 273 | H53 | 0.90970 | 0.15490 | 0.49086 | No |
| 274 | H54 | 0.90970 | 0.15490 | 0.69086 | No |
| 275 | H55 | 0.90970 | 0.15490 | 0.89086 | No |
| 276 | H56 | 0.09030 | 0.84510 | 0.99086 | No |
| 277 | H57 | 0.09030 | 0.84510 | 0.19086 | No |
| 278 | H58 | 0.09030 | 0.84510 | 0.39086 | No |
| 279 | H59 | 0.09030 | 0.84510 | 0.59086 | No |
| 280 | H60 | 0.09030 | 0.84510 | 0.79086 | No |
| 281 | H61 | 0.22060 | 0.90500 | 0.07076 | No |
| 282 | H62 | 0.22060 | 0.90500 | 0.27076 | No |
| 283 | H63 | 0.22060 | 0.90500 | 0.47076 | No |
| 284 | H64 | 0.22060 | 0.90500 | 0.67076 | No |
| 285 | H65 | 0.22060 | 0.90500 | 0.87076 | No |
| 286 | H66 | 0.77940 | 0.09500 | 0.97076 | No |
| 287 | H67 | 0.77940 | 0.09500 | 0.17076 | No |
| 288 | H68 | 0.77940 | 0.09500 | 0.37076 | No |
| 289 | H69 | 0.77940 | 0.09500 | 0.57076 | No |
| 290 | H70 | 0.77940 | 0.09500 | 0.77076 | No |
| 291 | H71 | 0.72060 | 0.59500 | 0.07076 | No |
| 292 | H72 | 0.72060 | 0.59500 | 0.27076 | No |



|     |      |         |         |         |    |
|-----|------|---------|---------|---------|----|
| 293 | H73  | 0.72060 | 0.59500 | 0.47076 | No |
| 294 | H74  | 0.72060 | 0.59500 | 0.67076 | No |
| 295 | H75  | 0.72060 | 0.59500 | 0.87076 | No |
| 296 | H76  | 0.27940 | 0.40500 | 0.97076 | No |
| 297 | H77  | 0.27940 | 0.40500 | 0.17076 | No |
| 298 | H78  | 0.27940 | 0.40500 | 0.37076 | No |
| 299 | H79  | 0.27940 | 0.40500 | 0.57076 | No |
| 300 | H80  | 0.27940 | 0.40500 | 0.77076 | No |
| 301 | H81  | 0.17940 | 0.99870 | 0.07702 | No |
| 302 | H82  | 0.17940 | 0.99870 | 0.27702 | No |
| 303 | H83  | 0.17940 | 0.99870 | 0.47702 | No |
| 304 | H84  | 0.17940 | 0.99870 | 0.67702 | No |
| 305 | H85  | 0.17940 | 0.99870 | 0.87702 | No |
| 306 | H86  | 0.82060 | 0.00130 | 0.97702 | No |
| 307 | H87  | 0.82060 | 0.00130 | 0.17702 | No |
| 308 | H88  | 0.82060 | 0.00130 | 0.37702 | No |
| 309 | H89  | 0.82060 | 0.00130 | 0.57702 | No |
| 310 | H90  | 0.82060 | 0.00130 | 0.77702 | No |
| 311 | H91  | 0.67940 | 0.50130 | 0.07702 | No |
| 312 | H92  | 0.67940 | 0.50130 | 0.27702 | No |
| 313 | H93  | 0.67940 | 0.50130 | 0.47702 | No |
| 314 | H94  | 0.67940 | 0.50130 | 0.67702 | No |
| 315 | H95  | 0.67940 | 0.50130 | 0.87702 | No |
| 316 | H96  | 0.32060 | 0.49870 | 0.97702 | No |
| 317 | H97  | 0.32060 | 0.49870 | 0.17702 | No |
| 318 | H98  | 0.32060 | 0.49870 | 0.37702 | No |
| 319 | H99  | 0.32060 | 0.49870 | 0.57702 | No |
| 320 | H100 | 0.32060 | 0.49870 | 0.77702 | No |
| 321 | H101 | 0.14300 | 0.91200 | 0.09190 | No |
| 322 | H102 | 0.14300 | 0.91200 | 0.29190 | No |
| 323 | H103 | 0.14300 | 0.91200 | 0.49190 | No |
| 324 | H104 | 0.14300 | 0.91200 | 0.69190 | No |
| 325 | H105 | 0.14300 | 0.91200 | 0.89190 | No |
| 326 | H106 | 0.85700 | 0.08800 | 0.99190 | No |
| 327 | H107 | 0.85700 | 0.08800 | 0.19190 | No |
| 328 | H108 | 0.85700 | 0.08800 | 0.39190 | No |
| 329 | H109 | 0.85700 | 0.08800 | 0.59190 | No |
| 330 | H110 | 0.85700 | 0.08800 | 0.79190 | No |

|     |      |         |         |         |    |
|-----|------|---------|---------|---------|----|
| 331 | H111 | 0.64300 | 0.58800 | 0.09190 | No |
| 332 | H112 | 0.64300 | 0.58800 | 0.29190 | No |
| 333 | H113 | 0.64300 | 0.58800 | 0.49190 | No |
| 334 | H114 | 0.64300 | 0.58800 | 0.69190 | No |
| 335 | H115 | 0.64300 | 0.58800 | 0.89190 | No |
| 336 | H116 | 0.35700 | 0.41200 | 0.99190 | No |
| 337 | H117 | 0.35700 | 0.41200 | 0.19190 | No |
| 338 | H118 | 0.35700 | 0.41200 | 0.39190 | No |
| 339 | H119 | 0.35700 | 0.41200 | 0.59190 | No |
| 340 | H120 | 0.35700 | 0.41200 | 0.79190 | No |
| 341 | H121 | 0.37870 | 0.20070 | 0.11042 | No |
| 342 | H122 | 0.37870 | 0.20070 | 0.31042 | No |
| 343 | H123 | 0.37870 | 0.20070 | 0.51042 | No |
| 344 | H124 | 0.37870 | 0.20070 | 0.71042 | No |
| 345 | H125 | 0.37870 | 0.20070 | 0.91042 | No |
| 346 | H126 | 0.62130 | 0.79930 | 0.01042 | No |
| 347 | H127 | 0.62130 | 0.79930 | 0.21042 | No |
| 348 | H128 | 0.62130 | 0.79930 | 0.41042 | No |
| 349 | H129 | 0.62130 | 0.79930 | 0.61042 | No |
| 350 | H130 | 0.62130 | 0.79930 | 0.81042 | No |
| 351 | H131 | 0.87870 | 0.29930 | 0.11042 | No |
| 352 | H132 | 0.87870 | 0.29930 | 0.31042 | No |
| 353 | H133 | 0.87870 | 0.29930 | 0.51042 | No |
| 354 | H134 | 0.87870 | 0.29930 | 0.71042 | No |
| 355 | H135 | 0.87870 | 0.29930 | 0.91042 | No |
| 356 | H136 | 0.12130 | 0.70070 | 0.01042 | No |
| 357 | H137 | 0.12130 | 0.70070 | 0.21042 | No |
| 358 | H138 | 0.12130 | 0.70070 | 0.41042 | No |
| 359 | H139 | 0.12130 | 0.70070 | 0.61042 | No |
| 360 | H140 | 0.12130 | 0.70070 | 0.81042 | No |
| 361 | H141 | 0.46340 | 0.23930 | 0.12906 | No |
| 362 | H142 | 0.46340 | 0.23930 | 0.32906 | No |
| 363 | H143 | 0.46340 | 0.23930 | 0.52906 | No |
| 364 | H144 | 0.46340 | 0.23930 | 0.72906 | No |
| 365 | H145 | 0.46340 | 0.23930 | 0.92906 | No |
| 366 | H146 | 0.53660 | 0.76070 | 0.02906 | No |
| 367 | H147 | 0.53660 | 0.76070 | 0.22906 | No |
| 368 | H148 | 0.53660 | 0.76070 | 0.42906 | No |

|     |      |         |         |         |    |
|-----|------|---------|---------|---------|----|
| 369 | H149 | 0.53660 | 0.76070 | 0.62906 | No |
| 370 | H150 | 0.53660 | 0.76070 | 0.82906 | No |
| 371 | H151 | 0.96340 | 0.26070 | 0.12906 | No |
| 372 | H152 | 0.96340 | 0.26070 | 0.32906 | No |
| 373 | H153 | 0.96340 | 0.26070 | 0.52906 | No |
| 374 | H154 | 0.96340 | 0.26070 | 0.72906 | No |
| 375 | H155 | 0.96340 | 0.26070 | 0.92906 | No |
| 376 | H156 | 0.03660 | 0.73930 | 0.02906 | No |
| 377 | H157 | 0.03660 | 0.73930 | 0.22906 | No |
| 378 | H158 | 0.03660 | 0.73930 | 0.42906 | No |
| 379 | H159 | 0.03660 | 0.73930 | 0.62906 | No |
| 380 | H160 | 0.03660 | 0.73930 | 0.82906 | No |
| 381 | H161 | 0.47240 | 0.11130 | 0.07710 | No |
| 382 | H162 | 0.47240 | 0.11130 | 0.27710 | No |
| 383 | H163 | 0.47240 | 0.11130 | 0.47710 | No |
| 384 | H164 | 0.47240 | 0.11130 | 0.67710 | No |
| 385 | H165 | 0.47240 | 0.11130 | 0.87710 | No |
| 386 | H166 | 0.52760 | 0.88870 | 0.97710 | No |
| 387 | H167 | 0.52760 | 0.88870 | 0.17710 | No |
| 388 | H168 | 0.52760 | 0.88870 | 0.37710 | No |
| 389 | H169 | 0.52760 | 0.88870 | 0.57710 | No |
| 390 | H170 | 0.52760 | 0.88870 | 0.77710 | No |
| 391 | H171 | 0.97240 | 0.38870 | 0.07710 | No |
| 392 | H172 | 0.97240 | 0.38870 | 0.27710 | No |
| 393 | H173 | 0.97240 | 0.38870 | 0.47710 | No |
| 394 | H174 | 0.97240 | 0.38870 | 0.67710 | No |
| 395 | H175 | 0.97240 | 0.38870 | 0.87710 | No |
| 396 | H176 | 0.02760 | 0.61130 | 0.97710 | No |
| 397 | H177 | 0.02760 | 0.61130 | 0.17710 | No |
| 398 | H178 | 0.02760 | 0.61130 | 0.37710 | No |
| 399 | H179 | 0.02760 | 0.61130 | 0.57710 | No |
| 400 | H180 | 0.02760 | 0.61130 | 0.77710 | No |
| 401 | H181 | 0.55860 | 0.15340 | 0.09382 | No |
| 402 | H182 | 0.55860 | 0.15340 | 0.29382 | No |
| 403 | H183 | 0.55860 | 0.15340 | 0.49382 | No |
| 404 | H184 | 0.55860 | 0.15340 | 0.69382 | No |
| 405 | H185 | 0.55860 | 0.15340 | 0.89382 | No |
| 406 | H186 | 0.44140 | 0.84660 | 0.99382 | No |

|     |      |         |         |         |    |
|-----|------|---------|---------|---------|----|
| 407 | H187 | 0.44140 | 0.84660 | 0.19382 | No |
| 408 | H188 | 0.44140 | 0.84660 | 0.39382 | No |
| 409 | H189 | 0.44140 | 0.84660 | 0.59382 | No |
| 410 | H190 | 0.44140 | 0.84660 | 0.79382 | No |
| 411 | H191 | 0.05860 | 0.34660 | 0.09382 | No |
| 412 | H192 | 0.05860 | 0.34660 | 0.29382 | No |
| 413 | H193 | 0.05860 | 0.34660 | 0.49382 | No |
| 414 | H194 | 0.05860 | 0.34660 | 0.69382 | No |
| 415 | H195 | 0.05860 | 0.34660 | 0.89382 | No |
| 416 | H196 | 0.94140 | 0.65340 | 0.99382 | No |
| 417 | H197 | 0.94140 | 0.65340 | 0.19382 | No |
| 418 | H198 | 0.94140 | 0.65340 | 0.39382 | No |
| 419 | H199 | 0.94140 | 0.65340 | 0.59382 | No |
| 420 | H200 | 0.94140 | 0.65340 | 0.79382 | No |
| 421 | H201 | 0.52810 | 0.99740 | 0.11126 | No |
| 422 | H202 | 0.52810 | 0.99740 | 0.31126 | No |
| 423 | H203 | 0.52810 | 0.99740 | 0.51126 | No |
| 424 | H204 | 0.52810 | 0.99740 | 0.71126 | No |
| 425 | H205 | 0.52810 | 0.99740 | 0.91126 | No |
| 426 | H206 | 0.47190 | 0.00260 | 0.01126 | No |
| 427 | H207 | 0.47190 | 0.00260 | 0.21126 | No |
| 428 | H208 | 0.47190 | 0.00260 | 0.41126 | No |
| 429 | H209 | 0.47190 | 0.00260 | 0.61126 | No |
| 430 | H210 | 0.47190 | 0.00260 | 0.81126 | No |
| 431 | H211 | 0.02810 | 0.50260 | 0.11126 | No |
| 432 | H212 | 0.02810 | 0.50260 | 0.31126 | No |
| 433 | H213 | 0.02810 | 0.50260 | 0.51126 | No |
| 434 | H214 | 0.02810 | 0.50260 | 0.71126 | No |
| 435 | H215 | 0.02810 | 0.50260 | 0.91126 | No |
| 436 | H216 | 0.97190 | 0.49740 | 0.01126 | No |
| 437 | H217 | 0.97190 | 0.49740 | 0.21126 | No |
| 438 | H218 | 0.97190 | 0.49740 | 0.41126 | No |
| 439 | H219 | 0.97190 | 0.49740 | 0.61126 | No |
| 440 | H220 | 0.97190 | 0.49740 | 0.81126 | No |
| 441 | H221 | 0.52650 | 0.07110 | 0.13938 | No |
| 442 | H222 | 0.52650 | 0.07110 | 0.33938 | No |
| 443 | H223 | 0.52650 | 0.07110 | 0.53938 | No |
| 444 | H224 | 0.52650 | 0.07110 | 0.73938 | No |

|     |      |         |         |         |    |
|-----|------|---------|---------|---------|----|
| 445 | H225 | 0.52650 | 0.07110 | 0.93938 | No |
| 446 | H226 | 0.47350 | 0.92890 | 0.03938 | No |
| 447 | H227 | 0.47350 | 0.92890 | 0.23938 | No |
| 448 | H228 | 0.47350 | 0.92890 | 0.43938 | No |
| 449 | H229 | 0.47350 | 0.92890 | 0.63938 | No |
| 450 | H230 | 0.47350 | 0.92890 | 0.83938 | No |
| 451 | H231 | 0.02650 | 0.42890 | 0.13938 | No |
| 452 | H232 | 0.02650 | 0.42890 | 0.33938 | No |
| 453 | H233 | 0.02650 | 0.42890 | 0.53938 | No |
| 454 | H234 | 0.02650 | 0.42890 | 0.73938 | No |
| 455 | H235 | 0.02650 | 0.42890 | 0.93938 | No |
| 456 | H236 | 0.97350 | 0.57110 | 0.03938 | No |
| 457 | H237 | 0.97350 | 0.57110 | 0.23938 | No |
| 458 | H238 | 0.97350 | 0.57110 | 0.43938 | No |
| 459 | H239 | 0.97350 | 0.57110 | 0.63938 | No |
| 460 | H240 | 0.97350 | 0.57110 | 0.83938 | No |
| 461 | H241 | 0.37400 | 0.06910 | 0.14084 | No |
| 462 | H242 | 0.37400 | 0.06910 | 0.34084 | No |
| 463 | H243 | 0.37400 | 0.06910 | 0.54084 | No |
| 464 | H244 | 0.37400 | 0.06910 | 0.74084 | No |
| 465 | H245 | 0.37400 | 0.06910 | 0.94084 | No |
| 466 | H246 | 0.62600 | 0.93090 | 0.04084 | No |
| 467 | H247 | 0.62600 | 0.93090 | 0.24084 | No |
| 468 | H248 | 0.62600 | 0.93090 | 0.44084 | No |
| 469 | H249 | 0.62600 | 0.93090 | 0.64084 | No |
| 470 | H250 | 0.62600 | 0.93090 | 0.84084 | No |
| 471 | H251 | 0.87400 | 0.43090 | 0.14084 | No |
| 472 | H252 | 0.87400 | 0.43090 | 0.34084 | No |
| 473 | H253 | 0.87400 | 0.43090 | 0.54084 | No |
| 474 | H254 | 0.87400 | 0.43090 | 0.74084 | No |
| 475 | H255 | 0.87400 | 0.43090 | 0.94084 | No |
| 476 | H256 | 0.12600 | 0.56910 | 0.04084 | No |
| 477 | H257 | 0.12600 | 0.56910 | 0.24084 | No |
| 478 | H258 | 0.12600 | 0.56910 | 0.44084 | No |
| 479 | H259 | 0.12600 | 0.56910 | 0.64084 | No |
| 480 | H260 | 0.12600 | 0.56910 | 0.84084 | No |
| 481 | H261 | 0.40970 | 0.96290 | 0.14300 | No |
| 482 | H262 | 0.40970 | 0.96290 | 0.34300 | No |

|     |      |         |         |         |    |
|-----|------|---------|---------|---------|----|
| 483 | H263 | 0.40970 | 0.96290 | 0.54300 | No |
| 484 | H264 | 0.40970 | 0.96290 | 0.74300 | No |
| 485 | H265 | 0.40970 | 0.96290 | 0.94300 | No |
| 486 | H266 | 0.59030 | 0.03710 | 0.04300 | No |
| 487 | H267 | 0.59030 | 0.03710 | 0.24300 | No |
| 488 | H268 | 0.59030 | 0.03710 | 0.44300 | No |
| 489 | H269 | 0.59030 | 0.03710 | 0.64300 | No |
| 490 | H270 | 0.59030 | 0.03710 | 0.84300 | No |
| 491 | H271 | 0.90970 | 0.53710 | 0.14300 | No |
| 492 | H272 | 0.90970 | 0.53710 | 0.34300 | No |
| 493 | H273 | 0.90970 | 0.53710 | 0.54300 | No |
| 494 | H274 | 0.90970 | 0.53710 | 0.74300 | No |
| 495 | H275 | 0.90970 | 0.53710 | 0.94300 | No |
| 496 | H276 | 0.09030 | 0.46290 | 0.04300 | No |
| 497 | H277 | 0.09030 | 0.46290 | 0.24300 | No |
| 498 | H278 | 0.09030 | 0.46290 | 0.44300 | No |
| 499 | H279 | 0.09030 | 0.46290 | 0.64300 | No |
| 500 | H280 | 0.09030 | 0.46290 | 0.84300 | No |
| 501 | H281 | 0.33640 | 0.04580 | 0.08812 | No |
| 502 | H282 | 0.33640 | 0.04580 | 0.28812 | No |
| 503 | H283 | 0.33640 | 0.04580 | 0.48812 | No |
| 504 | H284 | 0.33640 | 0.04580 | 0.68812 | No |
| 505 | H285 | 0.33640 | 0.04580 | 0.88812 | No |
| 506 | H286 | 0.66360 | 0.95420 | 0.98812 | No |
| 507 | H287 | 0.66360 | 0.95420 | 0.18812 | No |
| 508 | H288 | 0.66360 | 0.95420 | 0.38812 | No |
| 509 | H289 | 0.66360 | 0.95420 | 0.58812 | No |
| 510 | H290 | 0.66360 | 0.95420 | 0.78812 | No |
| 511 | H291 | 0.83640 | 0.45420 | 0.08812 | No |
| 512 | H292 | 0.83640 | 0.45420 | 0.28812 | No |
| 513 | H293 | 0.83640 | 0.45420 | 0.48812 | No |
| 514 | H294 | 0.83640 | 0.45420 | 0.68812 | No |
| 515 | H295 | 0.83640 | 0.45420 | 0.88812 | No |
| 516 | H296 | 0.16360 | 0.54580 | 0.98812 | No |
| 517 | H297 | 0.16360 | 0.54580 | 0.18812 | No |
| 518 | H298 | 0.16360 | 0.54580 | 0.38812 | No |
| 519 | H299 | 0.16360 | 0.54580 | 0.58812 | No |
| 520 | H300 | 0.16360 | 0.54580 | 0.78812 | No |

|     |      |         |         |         |    |
|-----|------|---------|---------|---------|----|
| 521 | H301 | 0.37410 | 0.93990 | 0.08970 | No |
| 522 | H302 | 0.37410 | 0.93990 | 0.28970 | No |
| 523 | H303 | 0.37410 | 0.93990 | 0.48970 | No |
| 524 | H304 | 0.37410 | 0.93990 | 0.68970 | No |
| 525 | H305 | 0.37410 | 0.93990 | 0.88970 | No |
| 526 | H306 | 0.62590 | 0.06010 | 0.98970 | No |
| 527 | H307 | 0.62590 | 0.06010 | 0.18970 | No |
| 528 | H308 | 0.62590 | 0.06010 | 0.38970 | No |
| 529 | H309 | 0.62590 | 0.06010 | 0.58970 | No |
| 530 | H310 | 0.62590 | 0.06010 | 0.78970 | No |
| 531 | H311 | 0.87410 | 0.56010 | 0.08970 | No |
| 532 | H312 | 0.87410 | 0.56010 | 0.28970 | No |
| 533 | H313 | 0.87410 | 0.56010 | 0.48970 | No |
| 534 | H314 | 0.87410 | 0.56010 | 0.68970 | No |
| 535 | H315 | 0.87410 | 0.56010 | 0.88970 | No |
| 536 | H316 | 0.12590 | 0.43990 | 0.98970 | No |
| 537 | H317 | 0.12590 | 0.43990 | 0.18970 | No |
| 538 | H318 | 0.12590 | 0.43990 | 0.38970 | No |
| 539 | H319 | 0.12590 | 0.43990 | 0.58970 | No |
| 540 | H320 | 0.12590 | 0.43990 | 0.78970 | No |
| 541 | H321 | 0.26160 | 0.89450 | 0.12342 | No |
| 542 | H322 | 0.26160 | 0.89450 | 0.32342 | No |
| 543 | H323 | 0.26160 | 0.89450 | 0.52342 | No |
| 544 | H324 | 0.26160 | 0.89450 | 0.72342 | No |
| 545 | H325 | 0.26160 | 0.89450 | 0.92342 | No |
| 546 | H326 | 0.73840 | 0.10550 | 0.02342 | No |
| 547 | H327 | 0.73840 | 0.10550 | 0.22342 | No |
| 548 | H328 | 0.73840 | 0.10550 | 0.42342 | No |
| 549 | H329 | 0.73840 | 0.10550 | 0.62342 | No |
| 550 | H330 | 0.73840 | 0.10550 | 0.82342 | No |
| 551 | H331 | 0.76160 | 0.60550 | 0.12342 | No |
| 552 | H332 | 0.76160 | 0.60550 | 0.32342 | No |
| 553 | H333 | 0.76160 | 0.60550 | 0.52342 | No |
| 554 | H334 | 0.76160 | 0.60550 | 0.72342 | No |
| 555 | H335 | 0.76160 | 0.60550 | 0.92342 | No |
| 556 | H336 | 0.23840 | 0.39450 | 0.02342 | No |
| 557 | H337 | 0.23840 | 0.39450 | 0.22342 | No |
| 558 | H338 | 0.23840 | 0.39450 | 0.42342 | No |

|     |      |         |         |         |    |
|-----|------|---------|---------|---------|----|
| 559 | H339 | 0.23840 | 0.39450 | 0.62342 | No |
| 560 | H340 | 0.23840 | 0.39450 | 0.82342 | No |
| 561 | H341 | 0.22810 | 0.00160 | 0.12678 | No |
| 562 | H342 | 0.22810 | 0.00160 | 0.32678 | No |
| 563 | H343 | 0.22810 | 0.00160 | 0.52678 | No |
| 564 | H344 | 0.22810 | 0.00160 | 0.72678 | No |
| 565 | H345 | 0.22810 | 0.00160 | 0.92678 | No |
| 566 | H346 | 0.77190 | 0.99840 | 0.02678 | No |
| 567 | H347 | 0.77190 | 0.99840 | 0.22678 | No |
| 568 | H348 | 0.77190 | 0.99840 | 0.42678 | No |
| 569 | H349 | 0.77190 | 0.99840 | 0.62678 | No |
| 570 | H350 | 0.77190 | 0.99840 | 0.82678 | No |
| 571 | H351 | 0.72810 | 0.49840 | 0.12678 | No |
| 572 | H352 | 0.72810 | 0.49840 | 0.32678 | No |
| 573 | H353 | 0.72810 | 0.49840 | 0.52678 | No |
| 574 | H354 | 0.72810 | 0.49840 | 0.72678 | No |
| 575 | H355 | 0.72810 | 0.49840 | 0.92678 | No |
| 576 | H356 | 0.27190 | 0.50160 | 0.02678 | No |
| 577 | H357 | 0.27190 | 0.50160 | 0.22678 | No |
| 578 | H358 | 0.27190 | 0.50160 | 0.42678 | No |
| 579 | H359 | 0.27190 | 0.50160 | 0.62678 | No |
| 580 | H360 | 0.27190 | 0.50160 | 0.82678 | No |
| 581 | Bi1  | 0.38917 | 0.62103 | 0.30063 | No |
| 582 | Bi2  | 0.38917 | 0.62103 | 0.90063 | No |
| 583 | Bi3  | 0.88917 | 0.87897 | 0.50063 | No |
| 584 | Bi4  | 0.88917 | 0.87897 | 0.70063 | No |
| 585 | Bi5  | 0.88917 | 0.87897 | 0.90063 | No |
| 586 | Bi6  | 0.11083 | 0.12103 | 0.00063 | No |
| 587 | Bi7  | 0.11083 | 0.12103 | 0.40063 | No |
| 588 | Bi8  | 0.11083 | 0.12103 | 0.80063 | No |
| 589 | N1   | 0.45000 | 0.29950 | 0.08598 | No |
| 590 | N2   | 0.45000 | 0.29950 | 0.28598 | No |
| 591 | N3   | 0.45000 | 0.29950 | 0.48598 | No |
| 592 | N4   | 0.45000 | 0.29950 | 0.68598 | No |
| 593 | N5   | 0.45000 | 0.29950 | 0.88598 | No |
| 594 | N6   | 0.55000 | 0.70050 | 0.98598 | No |
| 595 | N7   | 0.55000 | 0.70050 | 0.18598 | No |
| 596 | N8   | 0.55000 | 0.70050 | 0.38598 | No |



|     |     |         |         |         |    |
|-----|-----|---------|---------|---------|----|
| 597 | N9  | 0.55000 | 0.70050 | 0.58598 | No |
| 598 | N10 | 0.55000 | 0.70050 | 0.78598 | No |
| 599 | N11 | 0.95000 | 0.20050 | 0.08598 | No |
| 600 | N12 | 0.95000 | 0.20050 | 0.28598 | No |
| 601 | N13 | 0.95000 | 0.20050 | 0.48598 | No |
| 602 | N14 | 0.95000 | 0.20050 | 0.68598 | No |
| 603 | N15 | 0.95000 | 0.20050 | 0.88598 | No |
| 604 | N16 | 0.05000 | 0.79950 | 0.98598 | No |
| 605 | N17 | 0.05000 | 0.79950 | 0.18598 | No |
| 606 | N18 | 0.05000 | 0.79950 | 0.38598 | No |
| 607 | N19 | 0.05000 | 0.79950 | 0.58598 | No |
| 608 | N20 | 0.05000 | 0.79950 | 0.78598 | No |
| 609 | N21 | 0.19340 | 0.94140 | 0.08536 | No |
| 610 | N22 | 0.19340 | 0.94140 | 0.28536 | No |
| 611 | N23 | 0.19340 | 0.94140 | 0.48536 | No |
| 612 | N24 | 0.19340 | 0.94140 | 0.68536 | No |
| 613 | N25 | 0.19340 | 0.94140 | 0.88536 | No |
| 614 | N26 | 0.80660 | 0.05860 | 0.98536 | No |
| 615 | N27 | 0.80660 | 0.05860 | 0.18536 | No |
| 616 | N28 | 0.80660 | 0.05860 | 0.38536 | No |
| 617 | N29 | 0.80660 | 0.05860 | 0.58536 | No |
| 618 | N30 | 0.80660 | 0.05860 | 0.78536 | No |
| 619 | N31 | 0.69340 | 0.55860 | 0.08536 | No |
| 620 | N32 | 0.69340 | 0.55860 | 0.28536 | No |
| 621 | N33 | 0.69340 | 0.55860 | 0.48536 | No |
| 622 | N34 | 0.69340 | 0.55860 | 0.68536 | No |
| 623 | N35 | 0.69340 | 0.55860 | 0.88536 | No |
| 624 | N36 | 0.30660 | 0.44140 | 0.98536 | No |
| 625 | N37 | 0.30660 | 0.44140 | 0.18536 | No |
| 626 | N38 | 0.30660 | 0.44140 | 0.38536 | No |
| 627 | N39 | 0.30660 | 0.44140 | 0.58536 | No |
| 628 | N40 | 0.30660 | 0.44140 | 0.78536 | No |
| 629 | Sb1 | 0.38917 | 0.62103 | 0.10063 | No |
| 630 | Sb2 | 0.38917 | 0.62103 | 0.50063 | No |
| 631 | Sb3 | 0.38917 | 0.62103 | 0.70063 | No |
| 632 | Sb4 | 0.61083 | 0.37897 | 0.00063 | No |
| 633 | Sb5 | 0.61083 | 0.37897 | 0.20063 | No |
| 634 | Sb6 | 0.61083 | 0.37897 | 0.40063 | No |

|     |      |         |         |         |    |
|-----|------|---------|---------|---------|----|
| 635 | Sb7  | 0.61083 | 0.37897 | 0.60063 | No |
| 636 | Sb8  | 0.61083 | 0.37897 | 0.80063 | No |
| 637 | Sb9  | 0.88917 | 0.87897 | 0.10063 | No |
| 638 | Sb10 | 0.88917 | 0.87897 | 0.30063 | No |
| 639 | Sb11 | 0.11083 | 0.12103 | 0.20063 | No |
| 640 | Sb12 | 0.11083 | 0.12103 | 0.60063 | No |

Reflex Summary Report for Rietveld Refinement of 0.2[C<sub>6</sub>N<sub>2</sub>H<sub>18</sub>]BiI<sub>5</sub>+0.4[C<sub>6</sub>N<sub>2</sub>H<sub>18</sub>]SbI<sub>5</sub>:

Lattice Parameters

Lattice Type: Triclinic Space Group: P 1

| Parameter | Value              | Refined? |
|-----------|--------------------|----------|
| a         | 15.48409 ± 0.15342 | Yes      |
| b         | 14.06560 ± 0.13733 | Yes      |
| c         | 43.17725 ± 0.42772 | Yes      |
| α         | 86.72315 ± 0.06700 | Yes      |
| β         | 86.08317 ± 0.08071 | Yes      |
| γ         | 88.86027 ± 0.04541 | Yes      |

Structure Parameters

Refined Motion Groups: 0 Refined Torsions: 0

Refined Angles: 0 Refined Distances: 0

Number of Refined DOF: 0

Fractional Coordinates

| No. | Name | u       | v       | w       | Refined? |
|-----|------|---------|---------|---------|----------|
| 1   | C1   | 0.44165 | 0.21915 | 0.10807 | No       |
| 2   | C2   | 0.44165 | 0.21915 | 0.30807 | No       |
| 3   | C3   | 0.44165 | 0.21915 | 0.50807 | No       |
| 4   | C4   | 0.44165 | 0.21915 | 0.70807 | No       |
| 5   | C5   | 0.44165 | 0.21915 | 0.90807 | No       |
| 6   | C6   | 0.55779 | 0.78140 | 0.00781 | No       |
| 7   | C7   | 0.55779 | 0.78140 | 0.20781 | No       |
| 8   | C8   | 0.55779 | 0.78140 | 0.40781 | No       |
| 9   | C9   | 0.55779 | 0.78140 | 0.60781 | No       |
| 10  | C10  | 0.55779 | 0.78140 | 0.80781 | No       |
| 11  | C11  | 0.94137 | 0.28125 | 0.10776 | No       |
| 12  | C12  | 0.94137 | 0.28125 | 0.30776 | No       |
| 13  | C13  | 0.94137 | 0.28125 | 0.50776 | No       |
| 14  | C14  | 0.94137 | 0.28125 | 0.70776 | No       |

|    |     |         |         |         |    |
|----|-----|---------|---------|---------|----|
| 15 | C15 | 0.94137 | 0.28125 | 0.90776 | No |
| 16 | C16 | 0.05807 | 0.71931 | 0.00812 | No |
| 17 | C17 | 0.05807 | 0.71931 | 0.20812 | No |
| 18 | C18 | 0.05807 | 0.71931 | 0.40812 | No |
| 19 | C19 | 0.05807 | 0.71931 | 0.60812 | No |
| 20 | C20 | 0.05807 | 0.71931 | 0.80812 | No |
| 21 | C21 | 0.49612 | 0.13352 | 0.09689 | No |
| 22 | C22 | 0.49612 | 0.13352 | 0.29689 | No |
| 23 | C23 | 0.49612 | 0.13352 | 0.49689 | No |
| 24 | C24 | 0.49612 | 0.13352 | 0.69689 | No |
| 25 | C25 | 0.49612 | 0.13352 | 0.89689 | No |
| 26 | C26 | 0.50332 | 0.86703 | 0.99663 | No |
| 27 | C27 | 0.50332 | 0.86703 | 0.19663 | No |
| 28 | C28 | 0.50332 | 0.86703 | 0.39663 | No |
| 29 | C29 | 0.50332 | 0.86703 | 0.59663 | No |
| 30 | C30 | 0.50332 | 0.86703 | 0.79663 | No |
| 31 | C31 | 0.99584 | 0.36689 | 0.09652 | No |
| 32 | C32 | 0.99584 | 0.36689 | 0.29652 | No |
| 33 | C33 | 0.99584 | 0.36689 | 0.49652 | No |
| 34 | C34 | 0.99584 | 0.36689 | 0.69652 | No |
| 35 | C35 | 0.99584 | 0.36689 | 0.89652 | No |
| 36 | C36 | 0.00360 | 0.63367 | 0.99700 | No |
| 37 | C37 | 0.00360 | 0.63367 | 0.19700 | No |
| 38 | C38 | 0.00360 | 0.63367 | 0.39700 | No |
| 39 | C39 | 0.00360 | 0.63367 | 0.59700 | No |
| 40 | C40 | 0.00360 | 0.63367 | 0.79700 | No |
| 41 | C41 | 0.49472 | 0.05139 | 0.12000 | No |
| 42 | C42 | 0.49472 | 0.05139 | 0.32000 | No |
| 43 | C43 | 0.49472 | 0.05139 | 0.52000 | No |
| 44 | C44 | 0.49472 | 0.05139 | 0.72000 | No |
| 45 | C45 | 0.49472 | 0.05139 | 0.92000 | No |
| 46 | C46 | 0.50472 | 0.94917 | 0.01969 | No |
| 47 | C47 | 0.50472 | 0.94917 | 0.21969 | No |
| 48 | C48 | 0.50472 | 0.94917 | 0.41969 | No |
| 49 | C49 | 0.50472 | 0.94917 | 0.61969 | No |
| 50 | C50 | 0.50472 | 0.94917 | 0.81969 | No |
| 51 | C51 | 0.99444 | 0.44902 | 0.11957 | No |
| 52 | C52 | 0.99444 | 0.44902 | 0.31957 | No |

|    |     |         |         |         |    |
|----|-----|---------|---------|---------|----|
| 53 | C53 | 0.99444 | 0.44902 | 0.51957 | No |
| 54 | C54 | 0.99444 | 0.44902 | 0.71957 | No |
| 55 | C55 | 0.99444 | 0.44902 | 0.91957 | No |
| 56 | C56 | 0.00500 | 0.55153 | 0.02011 | No |
| 57 | C57 | 0.00500 | 0.55153 | 0.22011 | No |
| 58 | C58 | 0.00500 | 0.55153 | 0.42011 | No |
| 59 | C59 | 0.00500 | 0.55153 | 0.62011 | No |
| 60 | C60 | 0.00500 | 0.55153 | 0.82011 | No |
| 61 | C61 | 0.40357 | 0.01816 | 0.12878 | No |
| 62 | C62 | 0.40357 | 0.01816 | 0.32878 | No |
| 63 | C63 | 0.40357 | 0.01816 | 0.52878 | No |
| 64 | C64 | 0.40357 | 0.01816 | 0.72878 | No |
| 65 | C65 | 0.40357 | 0.01816 | 0.92878 | No |
| 66 | C66 | 0.59587 | 0.98239 | 0.02834 | No |
| 67 | C67 | 0.59587 | 0.98239 | 0.22834 | No |
| 68 | C68 | 0.59587 | 0.98239 | 0.42834 | No |
| 69 | C69 | 0.59587 | 0.98239 | 0.62834 | No |
| 70 | C70 | 0.59587 | 0.98239 | 0.82834 | No |
| 71 | C71 | 0.90329 | 0.48223 | 0.12833 | No |
| 72 | C72 | 0.90329 | 0.48223 | 0.32833 | No |
| 73 | C73 | 0.90329 | 0.48223 | 0.52833 | No |
| 74 | C74 | 0.90329 | 0.48223 | 0.72833 | No |
| 75 | C75 | 0.90329 | 0.48223 | 0.92833 | No |
| 76 | C76 | 0.09615 | 0.51833 | 0.02879 | No |
| 77 | C77 | 0.09615 | 0.51833 | 0.22879 | No |
| 78 | C78 | 0.09615 | 0.51833 | 0.42879 | No |
| 79 | C79 | 0.09615 | 0.51833 | 0.62879 | No |
| 80 | C80 | 0.09615 | 0.51833 | 0.82879 | No |
| 81 | C81 | 0.34431 | 0.99076 | 0.10134 | No |
| 82 | C82 | 0.34431 | 0.99076 | 0.30134 | No |
| 83 | C83 | 0.34431 | 0.99076 | 0.50134 | No |
| 84 | C84 | 0.34431 | 0.99076 | 0.70134 | No |
| 85 | C85 | 0.34431 | 0.99076 | 0.90134 | No |
| 86 | C86 | 0.65513 | 0.00979 | 0.00150 | No |
| 87 | C87 | 0.65513 | 0.00979 | 0.20150 | No |
| 88 | C88 | 0.65513 | 0.00979 | 0.40150 | No |
| 89 | C89 | 0.65513 | 0.00979 | 0.60150 | No |
| 90 | C90 | 0.65513 | 0.00979 | 0.80150 | No |

|     |      |         |         |         |    |
|-----|------|---------|---------|---------|----|
| 91  | C91  | 0.84403 | 0.51003 | 0.10122 | No |
| 92  | C92  | 0.84403 | 0.51003 | 0.30122 | No |
| 93  | C93  | 0.84403 | 0.51003 | 0.50122 | No |
| 94  | C94  | 0.84403 | 0.51003 | 0.70122 | No |
| 95  | C95  | 0.84403 | 0.51003 | 0.90122 | No |
| 96  | C96  | 0.15541 | 0.49053 | 0.00162 | No |
| 97  | C97  | 0.15541 | 0.49053 | 0.20162 | No |
| 98  | C98  | 0.15541 | 0.49053 | 0.40162 | No |
| 99  | C99  | 0.15541 | 0.49053 | 0.60162 | No |
| 100 | C100 | 0.15541 | 0.49053 | 0.80162 | No |
| 101 | C101 | 0.25436 | 0.95563 | 0.11177 | No |
| 102 | C102 | 0.25436 | 0.95563 | 0.31177 | No |
| 103 | C103 | 0.25436 | 0.95563 | 0.51177 | No |
| 104 | C104 | 0.25436 | 0.95563 | 0.71177 | No |
| 105 | C105 | 0.25436 | 0.95563 | 0.91177 | No |
| 106 | C106 | 0.74508 | 0.04492 | 0.01179 | No |
| 107 | C107 | 0.74508 | 0.04492 | 0.21179 | No |
| 108 | C108 | 0.74508 | 0.04492 | 0.41179 | No |
| 109 | C109 | 0.74508 | 0.04492 | 0.61179 | No |
| 110 | C110 | 0.74508 | 0.04492 | 0.81179 | No |
| 111 | C111 | 0.75408 | 0.54513 | 0.11162 | No |
| 112 | C112 | 0.75408 | 0.54513 | 0.31162 | No |
| 113 | C113 | 0.75408 | 0.54513 | 0.51162 | No |
| 114 | C114 | 0.75408 | 0.54513 | 0.71162 | No |
| 115 | C115 | 0.75408 | 0.54513 | 0.91162 | No |
| 116 | C116 | 0.24536 | 0.45542 | 0.01194 | No |
| 117 | C117 | 0.24536 | 0.45542 | 0.21194 | No |
| 118 | C118 | 0.24536 | 0.45542 | 0.41194 | No |
| 119 | C119 | 0.24536 | 0.45542 | 0.61194 | No |
| 120 | C120 | 0.24536 | 0.45542 | 0.81194 | No |
| 121 | I1   | 0.48431 | 0.51937 | 0.04166 | No |
| 122 | I2   | 0.48431 | 0.51937 | 0.24166 | No |
| 123 | I3   | 0.48431 | 0.51937 | 0.44166 | No |
| 124 | I4   | 0.48431 | 0.51937 | 0.64166 | No |
| 125 | I5   | 0.48431 | 0.51937 | 0.84166 | No |
| 126 | I6   | 0.51513 | 0.48118 | 0.94166 | No |
| 127 | I7   | 0.51513 | 0.48118 | 0.14166 | No |
| 128 | I8   | 0.51513 | 0.48118 | 0.34166 | No |

|     |     |         |         |         |    |
|-----|-----|---------|---------|---------|----|
| 129 | I9  | 0.51513 | 0.48118 | 0.54166 | No |
| 130 | I10 | 0.51513 | 0.48118 | 0.74166 | No |
| 131 | I11 | 0.98403 | 0.98146 | 0.04122 | No |
| 132 | I12 | 0.98403 | 0.98146 | 0.24122 | No |
| 133 | I13 | 0.98403 | 0.98146 | 0.44122 | No |
| 134 | I14 | 0.98403 | 0.98146 | 0.64122 | No |
| 135 | I15 | 0.98403 | 0.98146 | 0.84122 | No |
| 136 | I16 | 0.01541 | 0.01910 | 0.94210 | No |
| 137 | I17 | 0.01541 | 0.01910 | 0.14210 | No |
| 138 | I18 | 0.01541 | 0.01910 | 0.34210 | No |
| 139 | I19 | 0.01541 | 0.01910 | 0.54210 | No |
| 140 | I20 | 0.01541 | 0.01910 | 0.74210 | No |
| 141 | I21 | 0.25933 | 0.45583 | 0.10163 | No |
| 142 | I22 | 0.25933 | 0.45583 | 0.30163 | No |
| 143 | I23 | 0.25933 | 0.45583 | 0.50163 | No |
| 144 | I24 | 0.25933 | 0.45583 | 0.70163 | No |
| 145 | I25 | 0.25933 | 0.45583 | 0.90163 | No |
| 146 | I26 | 0.74011 | 0.54473 | 0.00132 | No |
| 147 | I27 | 0.74011 | 0.54473 | 0.20132 | No |
| 148 | I28 | 0.74011 | 0.54473 | 0.40132 | No |
| 149 | I29 | 0.74011 | 0.54473 | 0.60132 | No |
| 150 | I30 | 0.74011 | 0.54473 | 0.80132 | No |
| 151 | I31 | 0.75905 | 0.04452 | 0.10148 | No |
| 152 | I32 | 0.75905 | 0.04452 | 0.30148 | No |
| 153 | I33 | 0.75905 | 0.04452 | 0.50148 | No |
| 154 | I34 | 0.75905 | 0.04452 | 0.70148 | No |
| 155 | I35 | 0.75905 | 0.04452 | 0.90148 | No |
| 156 | I36 | 0.24039 | 0.95603 | 0.00147 | No |
| 157 | I37 | 0.24039 | 0.95603 | 0.20147 | No |
| 158 | I38 | 0.24039 | 0.95603 | 0.40147 | No |
| 159 | I39 | 0.24039 | 0.95603 | 0.60147 | No |
| 160 | I40 | 0.24039 | 0.95603 | 0.80147 | No |
| 161 | I41 | 0.29895 | 0.73263 | 0.05287 | No |
| 162 | I42 | 0.29895 | 0.73263 | 0.25287 | No |
| 163 | I43 | 0.29895 | 0.73263 | 0.45287 | No |
| 164 | I44 | 0.29895 | 0.73263 | 0.65287 | No |
| 165 | I45 | 0.29895 | 0.73263 | 0.85287 | No |
| 166 | I46 | 0.70049 | 0.26793 | 0.95279 | No |

|     |     |         |         |         |    |
|-----|-----|---------|---------|---------|----|
| 167 | I47 | 0.70049 | 0.26793 | 0.15279 | No |
| 168 | I48 | 0.70049 | 0.26793 | 0.35279 | No |
| 169 | I49 | 0.70049 | 0.26793 | 0.55279 | No |
| 170 | I50 | 0.70049 | 0.26793 | 0.75279 | No |
| 171 | I51 | 0.79867 | 0.76815 | 0.05257 | No |
| 172 | I52 | 0.79867 | 0.76815 | 0.25257 | No |
| 173 | I53 | 0.79867 | 0.76815 | 0.45257 | No |
| 174 | I54 | 0.79867 | 0.76815 | 0.65257 | No |
| 175 | I55 | 0.79867 | 0.76815 | 0.85257 | No |
| 176 | I56 | 0.20077 | 0.23240 | 0.95309 | No |
| 177 | I57 | 0.20077 | 0.23240 | 0.15309 | No |
| 178 | I58 | 0.20077 | 0.23240 | 0.35309 | No |
| 179 | I59 | 0.20077 | 0.23240 | 0.55309 | No |
| 180 | I60 | 0.20077 | 0.23240 | 0.75309 | No |
| 181 | I61 | 0.30792 | 0.69868 | 0.15727 | No |
| 182 | I62 | 0.30792 | 0.69868 | 0.35727 | No |
| 183 | I63 | 0.30792 | 0.69868 | 0.55727 | No |
| 184 | I64 | 0.30792 | 0.69868 | 0.75727 | No |
| 185 | I65 | 0.30792 | 0.69868 | 0.95727 | No |
| 186 | I66 | 0.69152 | 0.30187 | 0.05718 | No |
| 187 | I67 | 0.69152 | 0.30187 | 0.25718 | No |
| 188 | I68 | 0.69152 | 0.30187 | 0.45718 | No |
| 189 | I69 | 0.69152 | 0.30187 | 0.65718 | No |
| 190 | I70 | 0.69152 | 0.30187 | 0.85718 | No |
| 191 | I71 | 0.80764 | 0.80210 | 0.15694 | No |
| 192 | I72 | 0.80764 | 0.80210 | 0.35694 | No |
| 193 | I73 | 0.80764 | 0.80210 | 0.55694 | No |
| 194 | I74 | 0.80764 | 0.80210 | 0.75694 | No |
| 195 | I75 | 0.80764 | 0.80210 | 0.95694 | No |
| 196 | I76 | 0.19180 | 0.19846 | 0.05751 | No |
| 197 | I77 | 0.19180 | 0.19846 | 0.25751 | No |
| 198 | I78 | 0.19180 | 0.19846 | 0.45751 | No |
| 199 | I79 | 0.19180 | 0.19846 | 0.65751 | No |
| 200 | I80 | 0.19180 | 0.19846 | 0.85751 | No |
| 201 | I81 | 0.54614 | 0.76220 | 0.10369 | No |
| 202 | I82 | 0.54614 | 0.76220 | 0.30369 | No |
| 203 | I83 | 0.54614 | 0.76220 | 0.50369 | No |
| 204 | I84 | 0.54614 | 0.76220 | 0.70369 | No |

|     |      |         |         |         |    |
|-----|------|---------|---------|---------|----|
| 205 | I85  | 0.54614 | 0.76220 | 0.90369 | No |
| 206 | I86  | 0.45330 | 0.23835 | 0.00392 | No |
| 207 | I87  | 0.45330 | 0.23835 | 0.20392 | No |
| 208 | I88  | 0.45330 | 0.23835 | 0.40392 | No |
| 209 | I89  | 0.45330 | 0.23835 | 0.60392 | No |
| 210 | I90  | 0.45330 | 0.23835 | 0.80392 | No |
| 211 | I91  | 0.04642 | 0.73851 | 0.10399 | No |
| 212 | I92  | 0.04642 | 0.73851 | 0.30399 | No |
| 213 | I93  | 0.04642 | 0.73851 | 0.50399 | No |
| 214 | I94  | 0.04642 | 0.73851 | 0.70399 | No |
| 215 | I95  | 0.04642 | 0.73851 | 0.90399 | No |
| 216 | I96  | 0.95302 | 0.26205 | 0.00363 | No |
| 217 | I97  | 0.95302 | 0.26205 | 0.20363 | No |
| 218 | I98  | 0.95302 | 0.26205 | 0.40362 | No |
| 219 | I99  | 0.95302 | 0.26205 | 0.60362 | No |
| 220 | I100 | 0.95302 | 0.26205 | 0.80362 | No |
| 221 | H1   | 0.43935 | 0.27828 | 0.06605 | No |
| 222 | H2   | 0.43935 | 0.27828 | 0.26605 | No |
| 223 | H3   | 0.43935 | 0.27828 | 0.46605 | No |
| 224 | H4   | 0.43935 | 0.27828 | 0.66605 | No |
| 225 | H5   | 0.43935 | 0.27828 | 0.86605 | No |
| 226 | H6   | 0.56009 | 0.72228 | 0.96583 | No |
| 227 | H7   | 0.56009 | 0.72228 | 0.16583 | No |
| 228 | H8   | 0.56009 | 0.72228 | 0.36583 | No |
| 229 | H9   | 0.56009 | 0.72228 | 0.56583 | No |
| 230 | H10  | 0.56009 | 0.72228 | 0.76583 | No |
| 231 | H11  | 0.93907 | 0.22212 | 0.06578 | No |
| 232 | H12  | 0.93907 | 0.22212 | 0.26578 | No |
| 233 | H13  | 0.93907 | 0.22212 | 0.46578 | No |
| 234 | H14  | 0.93907 | 0.22212 | 0.66578 | No |
| 235 | H15  | 0.93907 | 0.22212 | 0.86578 | No |
| 236 | H16  | 0.06037 | 0.77843 | 0.96610 | No |
| 237 | H17  | 0.06037 | 0.77843 | 0.16610 | No |
| 238 | H18  | 0.06037 | 0.77843 | 0.36610 | No |
| 239 | H19  | 0.06037 | 0.77843 | 0.56610 | No |
| 240 | H20  | 0.06037 | 0.77843 | 0.76610 | No |
| 241 | H21  | 0.50542 | 0.32441 | 0.08664 | No |
| 242 | H22  | 0.50542 | 0.32441 | 0.28664 | No |



|     |     |         |         |         |    |
|-----|-----|---------|---------|---------|----|
| 243 | H23 | 0.50542 | 0.32441 | 0.48664 | No |
| 244 | H24 | 0.50542 | 0.32441 | 0.68664 | No |
| 245 | H25 | 0.50542 | 0.32441 | 0.88664 | No |
| 246 | H26 | 0.49402 | 0.67615 | 0.98652 | No |
| 247 | H27 | 0.49402 | 0.67615 | 0.18652 | No |
| 248 | H28 | 0.49402 | 0.67615 | 0.38652 | No |
| 249 | H29 | 0.49402 | 0.67615 | 0.58652 | No |
| 250 | H30 | 0.49402 | 0.67615 | 0.78652 | No |
| 251 | H31 | 0.00570 | 0.17587 | 0.08698 | No |
| 252 | H32 | 0.00570 | 0.17587 | 0.28698 | No |
| 253 | H33 | 0.00570 | 0.17587 | 0.48698 | No |
| 254 | H34 | 0.00570 | 0.17587 | 0.68698 | No |
| 255 | H35 | 0.00570 | 0.17587 | 0.88698 | No |
| 256 | H36 | 0.99374 | 0.82468 | 0.98618 | No |
| 257 | H37 | 0.99374 | 0.82468 | 0.18618 | No |
| 258 | H38 | 0.99374 | 0.82468 | 0.38618 | No |
| 259 | H39 | 0.99374 | 0.82468 | 0.58618 | No |
| 260 | H40 | 0.99374 | 0.82468 | 0.78618 | No |
| 261 | H41 | 0.40947 | 0.34530 | 0.09051 | No |
| 262 | H42 | 0.40947 | 0.34530 | 0.29051 | No |
| 263 | H43 | 0.40947 | 0.34530 | 0.49051 | No |
| 264 | H44 | 0.40947 | 0.34530 | 0.69051 | No |
| 265 | H45 | 0.40947 | 0.34530 | 0.89051 | No |
| 266 | H46 | 0.58997 | 0.65526 | 0.99030 | No |
| 267 | H47 | 0.58997 | 0.65526 | 0.19030 | No |
| 268 | H48 | 0.58997 | 0.65526 | 0.39030 | No |
| 269 | H49 | 0.58997 | 0.65526 | 0.59030 | No |
| 270 | H50 | 0.58997 | 0.65526 | 0.79030 | No |
| 271 | H51 | 0.90919 | 0.15509 | 0.09028 | No |
| 272 | H52 | 0.90919 | 0.15509 | 0.29028 | No |
| 273 | H53 | 0.90919 | 0.15509 | 0.49028 | No |
| 274 | H54 | 0.90919 | 0.15509 | 0.69028 | No |
| 275 | H55 | 0.90919 | 0.15509 | 0.89028 | No |
| 276 | H56 | 0.09025 | 0.84547 | 0.99052 | No |
| 277 | H57 | 0.09025 | 0.84547 | 0.19052 | No |
| 278 | H58 | 0.09025 | 0.84547 | 0.39052 | No |
| 279 | H59 | 0.09025 | 0.84547 | 0.59052 | No |
| 280 | H60 | 0.09025 | 0.84547 | 0.79052 | No |

|     |     |         |         |         |    |
|-----|-----|---------|---------|---------|----|
| 281 | H61 | 0.22048 | 0.90541 | 0.07033 | No |
| 282 | H62 | 0.22048 | 0.90541 | 0.27032 | No |
| 283 | H63 | 0.22048 | 0.90541 | 0.47032 | No |
| 284 | H64 | 0.22048 | 0.90541 | 0.67032 | No |
| 285 | H65 | 0.22048 | 0.90541 | 0.87032 | No |
| 286 | H66 | 0.77896 | 0.09515 | 0.97028 | No |
| 287 | H67 | 0.77896 | 0.09515 | 0.17028 | No |
| 288 | H68 | 0.77896 | 0.09515 | 0.37028 | No |
| 289 | H69 | 0.77896 | 0.09515 | 0.57028 | No |
| 290 | H70 | 0.77896 | 0.09515 | 0.77028 | No |
| 291 | H71 | 0.72020 | 0.59535 | 0.07014 | No |
| 292 | H72 | 0.72020 | 0.59535 | 0.27014 | No |
| 293 | H73 | 0.72020 | 0.59535 | 0.47014 | No |
| 294 | H74 | 0.72020 | 0.59535 | 0.67014 | No |
| 295 | H75 | 0.72020 | 0.59535 | 0.87014 | No |
| 296 | H76 | 0.27924 | 0.40521 | 0.97046 | No |
| 297 | H77 | 0.27924 | 0.40521 | 0.17046 | No |
| 298 | H78 | 0.27924 | 0.40521 | 0.37046 | No |
| 299 | H79 | 0.27924 | 0.40521 | 0.57046 | No |
| 300 | H80 | 0.27924 | 0.40521 | 0.77046 | No |
| 301 | H81 | 0.17930 | 0.99914 | 0.07658 | No |
| 302 | H82 | 0.17930 | 0.99914 | 0.27658 | No |
| 303 | H83 | 0.17930 | 0.99914 | 0.47658 | No |
| 304 | H84 | 0.17930 | 0.99914 | 0.67658 | No |
| 305 | H85 | 0.17930 | 0.99914 | 0.87658 | No |
| 306 | H86 | 0.82014 | 0.00141 | 0.97654 | No |
| 307 | H87 | 0.82014 | 0.00141 | 0.17654 | No |
| 308 | H88 | 0.82014 | 0.00141 | 0.37654 | No |
| 309 | H89 | 0.82014 | 0.00141 | 0.57654 | No |
| 310 | H90 | 0.82014 | 0.00141 | 0.77654 | No |
| 311 | H91 | 0.67902 | 0.50160 | 0.07646 | No |
| 312 | H92 | 0.67902 | 0.50160 | 0.27646 | No |
| 313 | H93 | 0.67902 | 0.50160 | 0.47646 | No |
| 314 | H94 | 0.67902 | 0.50160 | 0.67646 | No |
| 315 | H95 | 0.67902 | 0.50160 | 0.87646 | No |
| 316 | H96 | 0.32042 | 0.49895 | 0.97666 | No |
| 317 | H97 | 0.32042 | 0.49895 | 0.17667 | No |
| 318 | H98 | 0.32042 | 0.49895 | 0.37666 | No |

|     |      |         |         |         |    |
|-----|------|---------|---------|---------|----|
| 319 | H99  | 0.32042 | 0.49895 | 0.57666 | No |
| 320 | H100 | 0.32042 | 0.49895 | 0.77666 | No |
| 321 | H101 | 0.14292 | 0.91240 | 0.09151 | No |
| 322 | H102 | 0.14292 | 0.91240 | 0.29151 | No |
| 323 | H103 | 0.14292 | 0.91240 | 0.49151 | No |
| 324 | H104 | 0.14292 | 0.91240 | 0.69151 | No |
| 325 | H105 | 0.14292 | 0.91240 | 0.89151 | No |
| 326 | H106 | 0.85652 | 0.08815 | 0.99137 | No |
| 327 | H107 | 0.85652 | 0.08815 | 0.19137 | No |
| 328 | H108 | 0.85652 | 0.08815 | 0.39137 | No |
| 329 | H109 | 0.85652 | 0.08815 | 0.59137 | No |
| 330 | H110 | 0.85652 | 0.08815 | 0.79137 | No |
| 331 | H111 | 0.64264 | 0.58833 | 0.09133 | No |
| 332 | H112 | 0.64264 | 0.58833 | 0.29133 | No |
| 333 | H113 | 0.64264 | 0.58833 | 0.49133 | No |
| 334 | H114 | 0.64264 | 0.58833 | 0.69133 | No |
| 335 | H115 | 0.64264 | 0.58833 | 0.89133 | No |
| 336 | H116 | 0.35680 | 0.41222 | 0.99155 | No |
| 337 | H117 | 0.35680 | 0.41222 | 0.19155 | No |
| 338 | H118 | 0.35680 | 0.41222 | 0.39155 | No |
| 339 | H119 | 0.35680 | 0.41222 | 0.59155 | No |
| 340 | H120 | 0.35680 | 0.41222 | 0.79155 | No |
| 341 | H121 | 0.37849 | 0.20084 | 0.11013 | No |
| 342 | H122 | 0.37849 | 0.20084 | 0.31013 | No |
| 343 | H123 | 0.37849 | 0.20084 | 0.51013 | No |
| 344 | H124 | 0.37849 | 0.20084 | 0.71013 | No |
| 345 | H125 | 0.37849 | 0.20084 | 0.91013 | No |
| 346 | H126 | 0.62095 | 0.79972 | 0.00979 | No |
| 347 | H127 | 0.62095 | 0.79972 | 0.20979 | No |
| 348 | H128 | 0.62095 | 0.79972 | 0.40979 | No |
| 349 | H129 | 0.62095 | 0.79972 | 0.60979 | No |
| 350 | H130 | 0.62095 | 0.79972 | 0.80979 | No |
| 351 | H131 | 0.87821 | 0.29955 | 0.10981 | No |
| 352 | H132 | 0.87821 | 0.29955 | 0.30981 | No |
| 353 | H133 | 0.87821 | 0.29955 | 0.50981 | No |
| 354 | H134 | 0.87821 | 0.29955 | 0.70981 | No |
| 355 | H135 | 0.87821 | 0.29955 | 0.90981 | No |
| 356 | H136 | 0.12123 | 0.70101 | 0.01011 | No |

|     |      |         |         |         |    |
|-----|------|---------|---------|---------|----|
| 357 | H137 | 0.12123 | 0.70101 | 0.21011 | No |
| 358 | H138 | 0.12123 | 0.70101 | 0.41011 | No |
| 359 | H139 | 0.12123 | 0.70101 | 0.61011 | No |
| 360 | H140 | 0.12123 | 0.70101 | 0.81011 | No |
| 361 | H141 | 0.46314 | 0.23946 | 0.12871 | No |
| 362 | H142 | 0.46314 | 0.23946 | 0.32871 | No |
| 363 | H143 | 0.46314 | 0.23946 | 0.52871 | No |
| 364 | H144 | 0.46314 | 0.23946 | 0.72871 | No |
| 365 | H145 | 0.46314 | 0.23946 | 0.92871 | No |
| 366 | H146 | 0.53630 | 0.76109 | 0.02849 | No |
| 367 | H147 | 0.53630 | 0.76109 | 0.22849 | No |
| 368 | H148 | 0.53630 | 0.76109 | 0.42849 | No |
| 369 | H149 | 0.53630 | 0.76109 | 0.62849 | No |
| 370 | H150 | 0.53630 | 0.76109 | 0.82849 | No |
| 371 | H151 | 0.96286 | 0.26094 | 0.12841 | No |
| 372 | H152 | 0.96286 | 0.26094 | 0.32841 | No |
| 373 | H153 | 0.96286 | 0.26094 | 0.52841 | No |
| 374 | H154 | 0.96286 | 0.26094 | 0.72841 | No |
| 375 | H155 | 0.96286 | 0.26094 | 0.92841 | No |
| 376 | H156 | 0.03658 | 0.73961 | 0.02879 | No |
| 377 | H157 | 0.03658 | 0.73961 | 0.22879 | No |
| 378 | H158 | 0.03658 | 0.73961 | 0.42879 | No |
| 379 | H159 | 0.03658 | 0.73961 | 0.62879 | No |
| 380 | H160 | 0.03658 | 0.73961 | 0.82879 | No |
| 381 | H161 | 0.47214 | 0.11141 | 0.07679 | No |
| 382 | H162 | 0.47214 | 0.11141 | 0.27679 | No |
| 383 | H163 | 0.47214 | 0.11141 | 0.47679 | No |
| 384 | H164 | 0.47214 | 0.11141 | 0.67679 | No |
| 385 | H165 | 0.47214 | 0.11141 | 0.87679 | No |
| 386 | H166 | 0.52730 | 0.88914 | 0.97649 | No |
| 387 | H167 | 0.52730 | 0.88914 | 0.17649 | No |
| 388 | H168 | 0.52730 | 0.88914 | 0.37649 | No |
| 389 | H169 | 0.52730 | 0.88914 | 0.57649 | No |
| 390 | H170 | 0.52730 | 0.88914 | 0.77649 | No |
| 391 | H171 | 0.97186 | 0.38900 | 0.07641 | No |
| 392 | H172 | 0.97186 | 0.38900 | 0.27641 | No |
| 393 | H173 | 0.97186 | 0.38900 | 0.47640 | No |
| 394 | H174 | 0.97186 | 0.38900 | 0.67640 | No |

|     |      |         |         |         |    |
|-----|------|---------|---------|---------|----|
| 395 | H175 | 0.97186 | 0.38900 | 0.87640 | No |
| 396 | H176 | 0.02758 | 0.61156 | 0.97688 | No |
| 397 | H177 | 0.02758 | 0.61156 | 0.17688 | No |
| 398 | H178 | 0.02758 | 0.61156 | 0.37688 | No |
| 399 | H179 | 0.02758 | 0.61156 | 0.57688 | No |
| 400 | H180 | 0.02758 | 0.61156 | 0.77688 | No |
| 401 | H181 | 0.55829 | 0.15354 | 0.09344 | No |
| 402 | H182 | 0.55829 | 0.15354 | 0.29344 | No |
| 403 | H183 | 0.55829 | 0.15354 | 0.49344 | No |
| 404 | H184 | 0.55829 | 0.15354 | 0.69344 | No |
| 405 | H185 | 0.55829 | 0.15354 | 0.89344 | No |
| 406 | H186 | 0.44115 | 0.84702 | 0.99328 | No |
| 407 | H187 | 0.44115 | 0.84702 | 0.19328 | No |
| 408 | H188 | 0.44115 | 0.84702 | 0.39328 | No |
| 409 | H189 | 0.44115 | 0.84702 | 0.59328 | No |
| 410 | H190 | 0.44115 | 0.84702 | 0.79328 | No |
| 411 | H191 | 0.05857 | 0.34675 | 0.09367 | No |
| 412 | H192 | 0.05857 | 0.34675 | 0.29367 | No |
| 413 | H193 | 0.05857 | 0.34675 | 0.49367 | No |
| 414 | H194 | 0.05857 | 0.34675 | 0.69367 | No |
| 415 | H195 | 0.05857 | 0.34675 | 0.89367 | No |
| 416 | H196 | 0.94087 | 0.65380 | 0.99305 | No |
| 417 | H197 | 0.94087 | 0.65380 | 0.19305 | No |
| 418 | H198 | 0.94087 | 0.65380 | 0.39305 | No |
| 419 | H199 | 0.94087 | 0.65380 | 0.59305 | No |
| 420 | H200 | 0.94087 | 0.65380 | 0.79305 | No |
| 421 | H201 | 0.52780 | 0.99789 | 0.11062 | No |
| 422 | H202 | 0.52780 | 0.99789 | 0.31062 | No |
| 423 | H203 | 0.52780 | 0.99789 | 0.51062 | No |
| 424 | H204 | 0.52780 | 0.99789 | 0.71062 | No |
| 425 | H205 | 0.52780 | 0.99789 | 0.91062 | No |
| 426 | H206 | 0.47164 | 0.00267 | 0.01099 | No |
| 427 | H207 | 0.47164 | 0.00267 | 0.21099 | No |
| 428 | H208 | 0.47164 | 0.00267 | 0.41099 | No |
| 429 | H209 | 0.47164 | 0.00267 | 0.61099 | No |
| 430 | H210 | 0.47164 | 0.00267 | 0.81099 | No |
| 431 | H211 | 0.02808 | 0.50281 | 0.11107 | No |
| 432 | H212 | 0.02808 | 0.50281 | 0.31107 | No |

|     |      |         |         |         |    |
|-----|------|---------|---------|---------|----|
| 433 | H213 | 0.02808 | 0.50281 | 0.51107 | No |
| 434 | H214 | 0.02808 | 0.50281 | 0.71107 | No |
| 435 | H215 | 0.02808 | 0.50281 | 0.91107 | No |
| 436 | H216 | 0.97136 | 0.49774 | 0.01053 | No |
| 437 | H217 | 0.97136 | 0.49774 | 0.21053 | No |
| 438 | H218 | 0.97136 | 0.49774 | 0.41053 | No |
| 439 | H219 | 0.97136 | 0.49774 | 0.61053 | No |
| 440 | H220 | 0.97136 | 0.49774 | 0.81053 | No |
| 441 | H221 | 0.52621 | 0.07120 | 0.13905 | No |
| 442 | H222 | 0.52621 | 0.07120 | 0.33905 | No |
| 443 | H223 | 0.52621 | 0.07120 | 0.53905 | No |
| 444 | H224 | 0.52621 | 0.07120 | 0.73905 | No |
| 445 | H225 | 0.52621 | 0.07120 | 0.93905 | No |
| 446 | H226 | 0.47323 | 0.92935 | 0.03879 | No |
| 447 | H227 | 0.47323 | 0.92935 | 0.23879 | No |
| 448 | H228 | 0.47323 | 0.92935 | 0.43879 | No |
| 449 | H229 | 0.47323 | 0.92935 | 0.63879 | No |
| 450 | H230 | 0.47323 | 0.92935 | 0.83879 | No |
| 451 | H231 | 0.02649 | 0.42908 | 0.13922 | No |
| 452 | H232 | 0.02649 | 0.42908 | 0.33922 | No |
| 453 | H233 | 0.02649 | 0.42908 | 0.53922 | No |
| 454 | H234 | 0.02649 | 0.42908 | 0.73922 | No |
| 455 | H235 | 0.02649 | 0.42908 | 0.93922 | No |
| 456 | H236 | 0.97295 | 0.57147 | 0.03862 | No |
| 457 | H237 | 0.97295 | 0.57147 | 0.23862 | No |
| 458 | H238 | 0.97295 | 0.57147 | 0.43862 | No |
| 459 | H239 | 0.97295 | 0.57147 | 0.63862 | No |
| 460 | H240 | 0.97295 | 0.57147 | 0.83862 | No |
| 461 | H241 | 0.37379 | 0.06918 | 0.14060 | No |
| 462 | H242 | 0.37379 | 0.06918 | 0.34060 | No |
| 463 | H243 | 0.37379 | 0.06918 | 0.54060 | No |
| 464 | H244 | 0.37379 | 0.06918 | 0.74060 | No |
| 465 | H245 | 0.37379 | 0.06918 | 0.94060 | No |
| 466 | H246 | 0.62565 | 0.93138 | 0.04016 | No |
| 467 | H247 | 0.62565 | 0.93138 | 0.24016 | No |
| 468 | H248 | 0.62565 | 0.93138 | 0.44016 | No |
| 469 | H249 | 0.62565 | 0.93138 | 0.64016 | No |
| 470 | H250 | 0.62565 | 0.93138 | 0.84016 | No |

|     |      |         |         |         |    |
|-----|------|---------|---------|---------|----|
| 471 | H251 | 0.87351 | 0.43120 | 0.14019 | No |
| 472 | H252 | 0.87351 | 0.43120 | 0.34019 | No |
| 473 | H253 | 0.87351 | 0.43120 | 0.54019 | No |
| 474 | H254 | 0.87351 | 0.43120 | 0.74019 | No |
| 475 | H255 | 0.87351 | 0.43120 | 0.94019 | No |
| 476 | H256 | 0.12593 | 0.56936 | 0.04057 | No |
| 477 | H257 | 0.12593 | 0.56936 | 0.24057 | No |
| 478 | H258 | 0.12593 | 0.56936 | 0.44057 | No |
| 479 | H259 | 0.12593 | 0.56936 | 0.64057 | No |
| 480 | H260 | 0.12593 | 0.56936 | 0.84057 | No |
| 481 | H261 | 0.40947 | 0.96336 | 0.14244 | No |
| 482 | H262 | 0.40947 | 0.96336 | 0.34244 | No |
| 483 | H263 | 0.40947 | 0.96336 | 0.54244 | No |
| 484 | H264 | 0.40947 | 0.96336 | 0.74244 | No |
| 485 | H265 | 0.40947 | 0.96336 | 0.94244 | No |
| 486 | H266 | 0.58997 | 0.03720 | 0.04265 | No |
| 487 | H267 | 0.58997 | 0.03720 | 0.24265 | No |
| 488 | H268 | 0.58997 | 0.03720 | 0.44265 | No |
| 489 | H269 | 0.58997 | 0.03720 | 0.64265 | No |
| 490 | H270 | 0.58997 | 0.03720 | 0.84265 | No |
| 491 | H271 | 0.90919 | 0.53745 | 0.14229 | No |
| 492 | H272 | 0.90919 | 0.53745 | 0.34229 | No |
| 493 | H273 | 0.90919 | 0.53745 | 0.54229 | No |
| 494 | H274 | 0.90919 | 0.53745 | 0.74229 | No |
| 495 | H275 | 0.90919 | 0.53745 | 0.94229 | No |
| 496 | H276 | 0.09025 | 0.46311 | 0.04279 | No |
| 497 | H277 | 0.09025 | 0.46311 | 0.24279 | No |
| 498 | H278 | 0.09025 | 0.46311 | 0.44279 | No |
| 499 | H279 | 0.09025 | 0.46311 | 0.64279 | No |
| 500 | H280 | 0.09025 | 0.46311 | 0.84279 | No |
| 501 | H281 | 0.33621 | 0.04587 | 0.08791 | No |
| 502 | H282 | 0.33621 | 0.04587 | 0.28791 | No |
| 503 | H283 | 0.33621 | 0.04587 | 0.48791 | No |
| 504 | H284 | 0.33621 | 0.04587 | 0.68791 | No |
| 505 | H285 | 0.33621 | 0.04587 | 0.88791 | No |
| 506 | H286 | 0.66323 | 0.95469 | 0.98741 | No |
| 507 | H287 | 0.66323 | 0.95469 | 0.18741 | No |
| 508 | H288 | 0.66323 | 0.95469 | 0.38741 | No |

|     |      |         |         |         |    |
|-----|------|---------|---------|---------|----|
| 509 | H289 | 0.66323 | 0.95469 | 0.58741 | No |
| 510 | H290 | 0.66323 | 0.95469 | 0.78741 | No |
| 511 | H291 | 0.83593 | 0.45451 | 0.08748 | No |
| 512 | H292 | 0.83593 | 0.45451 | 0.28748 | No |
| 513 | H293 | 0.83593 | 0.45451 | 0.48748 | No |
| 514 | H294 | 0.83593 | 0.45451 | 0.68748 | No |
| 515 | H295 | 0.83593 | 0.45451 | 0.88748 | No |
| 516 | H296 | 0.16351 | 0.54605 | 0.98784 | No |
| 517 | H297 | 0.16351 | 0.54605 | 0.18784 | No |
| 518 | H298 | 0.16351 | 0.54605 | 0.38784 | No |
| 519 | H299 | 0.16351 | 0.54605 | 0.58784 | No |
| 520 | H300 | 0.16351 | 0.54605 | 0.78784 | No |
| 521 | H301 | 0.37389 | 0.94034 | 0.08916 | No |
| 522 | H302 | 0.37389 | 0.94034 | 0.28916 | No |
| 523 | H303 | 0.37389 | 0.94034 | 0.48916 | No |
| 524 | H304 | 0.37389 | 0.94034 | 0.68916 | No |
| 525 | H305 | 0.37389 | 0.94034 | 0.88916 | No |
| 526 | H306 | 0.62555 | 0.06021 | 0.98932 | No |
| 527 | H307 | 0.62555 | 0.06021 | 0.18932 | No |
| 528 | H308 | 0.62555 | 0.06021 | 0.38932 | No |
| 529 | H309 | 0.62555 | 0.06021 | 0.58932 | No |
| 530 | H310 | 0.62555 | 0.06021 | 0.78932 | No |
| 531 | H311 | 0.87361 | 0.56045 | 0.08900 | No |
| 532 | H312 | 0.87361 | 0.56045 | 0.28900 | No |
| 533 | H313 | 0.87361 | 0.56045 | 0.48900 | No |
| 534 | H314 | 0.87361 | 0.56045 | 0.68900 | No |
| 535 | H315 | 0.87361 | 0.56045 | 0.88900 | No |
| 536 | H316 | 0.12583 | 0.44010 | 0.98948 | No |
| 537 | H317 | 0.12583 | 0.44010 | 0.18948 | No |
| 538 | H318 | 0.12583 | 0.44010 | 0.38948 | No |
| 539 | H319 | 0.12583 | 0.44010 | 0.58948 | No |
| 540 | H320 | 0.12583 | 0.44010 | 0.78948 | No |
| 541 | H321 | 0.26145 | 0.89491 | 0.12296 | No |
| 542 | H322 | 0.26145 | 0.89491 | 0.32296 | No |
| 543 | H323 | 0.26145 | 0.89491 | 0.52296 | No |
| 544 | H324 | 0.26145 | 0.89491 | 0.72296 | No |
| 545 | H325 | 0.26145 | 0.89491 | 0.92296 | No |
| 546 | H326 | 0.73799 | 0.10565 | 0.02296 | No |



|     |      |         |         |         |    |
|-----|------|---------|---------|---------|----|
| 547 | H327 | 0.73799 | 0.10565 | 0.22296 | No |
| 548 | H328 | 0.73799 | 0.10565 | 0.42296 | No |
| 549 | H329 | 0.73799 | 0.10565 | 0.62296 | No |
| 550 | H330 | 0.73799 | 0.10565 | 0.82296 | No |
| 551 | H331 | 0.76117 | 0.60586 | 0.12277 | No |
| 552 | H332 | 0.76117 | 0.60586 | 0.32277 | No |
| 553 | H333 | 0.76117 | 0.60586 | 0.52277 | No |
| 554 | H334 | 0.76117 | 0.60586 | 0.72277 | No |
| 555 | H335 | 0.76117 | 0.60586 | 0.92277 | No |
| 556 | H336 | 0.23827 | 0.39470 | 0.02315 | No |
| 557 | H337 | 0.23827 | 0.39470 | 0.22315 | No |
| 558 | H338 | 0.23827 | 0.39470 | 0.42315 | No |
| 559 | H339 | 0.23827 | 0.39470 | 0.62315 | No |
| 560 | H340 | 0.23827 | 0.39470 | 0.82315 | No |
| 561 | H341 | 0.22797 | 0.00163 | 0.12665 | No |
| 562 | H342 | 0.22797 | 0.00163 | 0.32665 | No |
| 563 | H343 | 0.22797 | 0.00163 | 0.52665 | No |
| 564 | H344 | 0.22797 | 0.00163 | 0.72665 | No |
| 565 | H345 | 0.22797 | 0.00163 | 0.92665 | No |
| 566 | H346 | 0.77147 | 0.99892 | 0.02599 | No |
| 567 | H347 | 0.77147 | 0.99892 | 0.22599 | No |
| 568 | H348 | 0.77147 | 0.99892 | 0.42599 | No |
| 569 | H349 | 0.77147 | 0.99892 | 0.62599 | No |
| 570 | H350 | 0.77147 | 0.99892 | 0.82599 | No |
| 571 | H351 | 0.72769 | 0.49871 | 0.12619 | No |
| 572 | H352 | 0.72769 | 0.49871 | 0.32619 | No |
| 573 | H353 | 0.72769 | 0.49871 | 0.52619 | No |
| 574 | H354 | 0.72769 | 0.49871 | 0.72619 | No |
| 575 | H355 | 0.72769 | 0.49871 | 0.92619 | No |
| 576 | H356 | 0.27175 | 0.50185 | 0.02645 | No |
| 577 | H357 | 0.27175 | 0.50185 | 0.22645 | No |
| 578 | H358 | 0.27175 | 0.50185 | 0.42645 | No |
| 579 | H359 | 0.27175 | 0.50185 | 0.62645 | No |
| 580 | H360 | 0.27175 | 0.50185 | 0.82645 | No |
| 581 | Bi1  | 0.38895 | 0.62134 | 0.10019 | No |
| 582 | Bi2  | 0.38895 | 0.62134 | 0.70019 | No |
| 583 | Bi3  | 0.61049 | 0.37921 | 0.80015 | No |
| 584 | Bi4  | 0.11077 | 0.12110 | 0.20052 | No |

|     |     |         |         |         |    |
|-----|-----|---------|---------|---------|----|
| 585 | N1  | 0.44975 | 0.29969 | 0.08562 | No |
| 586 | N2  | 0.44975 | 0.29969 | 0.28562 | No |
| 587 | N3  | 0.44975 | 0.29969 | 0.48562 | No |
| 588 | N4  | 0.44975 | 0.29969 | 0.68562 | No |
| 589 | N5  | 0.44975 | 0.29969 | 0.88562 | No |
| 590 | N6  | 0.54969 | 0.70087 | 0.98542 | No |
| 591 | N7  | 0.54969 | 0.70087 | 0.18542 | No |
| 592 | N8  | 0.54969 | 0.70087 | 0.38542 | No |
| 593 | N9  | 0.54969 | 0.70087 | 0.58542 | No |
| 594 | N10 | 0.54969 | 0.70087 | 0.78542 | No |
| 595 | N11 | 0.94947 | 0.20071 | 0.08536 | No |
| 596 | N12 | 0.94947 | 0.20071 | 0.28536 | No |
| 597 | N13 | 0.94947 | 0.20071 | 0.48536 | No |
| 598 | N14 | 0.94947 | 0.20071 | 0.68536 | No |
| 599 | N15 | 0.94947 | 0.20071 | 0.88536 | No |
| 600 | N16 | 0.04997 | 0.79984 | 0.98568 | No |
| 601 | N17 | 0.04997 | 0.79984 | 0.18568 | No |
| 602 | N18 | 0.04997 | 0.79984 | 0.38568 | No |
| 603 | N19 | 0.04997 | 0.79984 | 0.58568 | No |
| 604 | N20 | 0.04997 | 0.79984 | 0.78568 | No |
| 605 | N21 | 0.19329 | 0.94182 | 0.08493 | No |
| 606 | N22 | 0.19329 | 0.94182 | 0.28493 | No |
| 607 | N23 | 0.19329 | 0.94182 | 0.48493 | No |
| 608 | N24 | 0.19329 | 0.94182 | 0.68493 | No |
| 609 | N25 | 0.19329 | 0.94182 | 0.88493 | No |
| 610 | N26 | 0.80615 | 0.05874 | 0.98487 | No |
| 611 | N27 | 0.80615 | 0.05874 | 0.18487 | No |
| 612 | N28 | 0.80615 | 0.05874 | 0.38487 | No |
| 613 | N29 | 0.80615 | 0.05874 | 0.58487 | No |
| 614 | N30 | 0.80615 | 0.05874 | 0.78487 | No |
| 615 | N31 | 0.69301 | 0.55893 | 0.08477 | No |
| 616 | N32 | 0.69301 | 0.55893 | 0.28477 | No |
| 617 | N33 | 0.69301 | 0.55893 | 0.48477 | No |
| 618 | N34 | 0.69301 | 0.55893 | 0.68477 | No |
| 619 | N35 | 0.69301 | 0.55893 | 0.88477 | No |
| 620 | N36 | 0.30643 | 0.44163 | 0.98503 | No |
| 621 | N37 | 0.30643 | 0.44163 | 0.18503 | No |
| 622 | N38 | 0.30643 | 0.44163 | 0.38503 | No |

|     |      |         |         |         |    |
|-----|------|---------|---------|---------|----|
| 623 | N39  | 0.30643 | 0.44163 | 0.58503 | No |
| 624 | N40  | 0.30643 | 0.44163 | 0.78503 | No |
| 625 | Sb1  | 0.38895 | 0.62134 | 0.30019 | No |
| 626 | Sb2  | 0.38895 | 0.62134 | 0.50019 | No |
| 627 | Sb3  | 0.38895 | 0.62134 | 0.90019 | No |
| 628 | Sb4  | 0.61049 | 0.37921 | 0.00015 | No |
| 629 | Sb5  | 0.61049 | 0.37921 | 0.20015 | No |
| 630 | Sb6  | 0.61049 | 0.37921 | 0.40015 | No |
| 631 | Sb7  | 0.61049 | 0.37921 | 0.60015 | No |
| 632 | Sb8  | 0.88867 | 0.87946 | 0.09982 | No |
| 633 | Sb9  | 0.88867 | 0.87946 | 0.29982 | No |
| 634 | Sb10 | 0.88867 | 0.87946 | 0.49982 | No |
| 635 | Sb11 | 0.88867 | 0.87946 | 0.69982 | No |
| 636 | Sb12 | 0.88867 | 0.87946 | 0.89982 | No |
| 637 | Sb13 | 0.11077 | 0.12110 | 0.00052 | No |
| 638 | Sb14 | 0.11077 | 0.12110 | 0.40052 | No |
| 639 | Sb15 | 0.11077 | 0.12110 | 0.60052 | No |
| 640 | Sb16 | 0.11077 | 0.12110 | 0.80052 | No |

## Reflex Summary Report for Rietveld Refinement of [C<sub>6</sub>N<sub>2</sub>H<sub>18</sub>]*Sb*I<sub>5</sub> :

### Lattice Parameters

Lattice Type: Triclinic Space Group: P 1

| Parameter | Value                            | Refined? |
|-----------|----------------------------------|----------|
| a         | 15.05779 ± <i>0.15659</i>        | Yes      |
| b         | 14.21729 ± <i>0.14699</i>        | Yes      |
| c         | 8.48135 ± <i>0.08922</i>         | Yes      |
| α         | 90.00000 ± <i>15995162.17605</i> | Yes      |
| β         | 90.00000 ± <i>0.00000</i>        | Yes      |
| γ         | 89.99999 ± <i>5007.80545</i>     | Yes      |

Errors are unusually large: This may be due to correlations between refined parameters.

### Structure Parameters

Refined Motion Groups: 0 Refined Torsions: 0

Refined Angles: 0 Refined Distances: 0

Number of Refined DOF: 0

### Fractional Coordinates

| No. | Name | u       | v       | w       | Refined? |
|-----|------|---------|---------|---------|----------|
| 1   | Sb1  | 0.38917 | 0.62103 | 0.50315 | No       |

|    |     |         |         |         |    |
|----|-----|---------|---------|---------|----|
| 2  | Sb2 | 0.61083 | 0.37897 | 0.00315 | No |
| 3  | Sb3 | 0.88917 | 0.87897 | 0.50315 | No |
| 4  | Sb4 | 0.11083 | 0.12103 | 0.00315 | No |
| 5  | I1  | 0.48458 | 0.51909 | 0.21060 | No |
| 6  | I2  | 0.51542 | 0.48091 | 0.71060 | No |
| 7  | I3  | 0.98458 | 0.98091 | 0.21060 | No |
| 8  | I4  | 0.01542 | 0.01909 | 0.71060 | No |
| 9  | I5  | 0.25948 | 0.45560 | 0.50969 | No |
| 10 | I6  | 0.74052 | 0.54440 | 0.00969 | No |
| 11 | I7  | 0.75948 | 0.04440 | 0.50969 | No |
| 12 | I8  | 0.24052 | 0.95560 | 0.00969 | No |
| 13 | I9  | 0.29912 | 0.73228 | 0.26645 | No |
| 14 | I10 | 0.70088 | 0.26772 | 0.76645 | No |
| 15 | I11 | 0.79912 | 0.76772 | 0.26645 | No |
| 16 | I12 | 0.20088 | 0.23228 | 0.76645 | No |
| 17 | I13 | 0.30809 | 0.69835 | 0.78842 | No |
| 18 | I14 | 0.69191 | 0.30165 | 0.28842 | No |
| 19 | I15 | 0.80809 | 0.80165 | 0.78842 | No |
| 20 | I16 | 0.19191 | 0.19835 | 0.28842 | No |
| 21 | I17 | 0.54645 | 0.76181 | 0.52133 | No |
| 22 | I18 | 0.45355 | 0.23819 | 0.02133 | No |
| 23 | I19 | 0.04645 | 0.73819 | 0.52133 | No |
| 24 | I20 | 0.95355 | 0.26181 | 0.02133 | No |
| 25 | N1  | 0.45000 | 0.29950 | 0.42990 | No |
| 26 | N2  | 0.55000 | 0.70050 | 0.92990 | No |
| 27 | N3  | 0.95000 | 0.20050 | 0.42990 | No |
| 28 | N4  | 0.05000 | 0.79950 | 0.92990 | No |
| 29 | N5  | 0.19340 | 0.94140 | 0.42680 | No |
| 30 | N6  | 0.80660 | 0.05860 | 0.92680 | No |
| 31 | N7  | 0.69340 | 0.55860 | 0.42680 | No |
| 32 | N8  | 0.30660 | 0.44140 | 0.92680 | No |
| 33 | H1  | 0.43960 | 0.27810 | 0.33200 | No |
| 34 | H2  | 0.56040 | 0.72190 | 0.83200 | No |
| 35 | H3  | 0.93960 | 0.22190 | 0.33200 | No |
| 36 | H4  | 0.06040 | 0.77810 | 0.83200 | No |
| 37 | H5  | 0.50570 | 0.32420 | 0.43520 | No |
| 38 | H6  | 0.49430 | 0.67580 | 0.93520 | No |
| 39 | H7  | 0.00570 | 0.17580 | 0.43520 | No |

|    |     |         |         |         |    |
|----|-----|---------|---------|---------|----|
| 40 | H8  | 0.99430 | 0.82420 | 0.93520 | No |
| 41 | H9  | 0.40970 | 0.34510 | 0.45430 | No |
| 42 | H10 | 0.59030 | 0.65490 | 0.95430 | No |
| 43 | H11 | 0.90970 | 0.15490 | 0.45430 | No |
| 44 | H12 | 0.09030 | 0.84510 | 0.95430 | No |
| 45 | H13 | 0.22060 | 0.90500 | 0.35380 | No |
| 46 | H14 | 0.77940 | 0.09500 | 0.85380 | No |
| 47 | H15 | 0.72060 | 0.59500 | 0.35380 | No |
| 48 | H16 | 0.27940 | 0.40500 | 0.85380 | No |
| 49 | H17 | 0.17940 | 0.99870 | 0.38510 | No |
| 50 | H18 | 0.82060 | 0.00130 | 0.88510 | No |
| 51 | H19 | 0.67940 | 0.50130 | 0.38510 | No |
| 52 | H20 | 0.32060 | 0.49870 | 0.88510 | No |
| 53 | H21 | 0.14300 | 0.91200 | 0.45950 | No |
| 54 | H22 | 0.85700 | 0.08800 | 0.95950 | No |
| 55 | H23 | 0.64300 | 0.58800 | 0.45950 | No |
| 56 | H24 | 0.35700 | 0.41200 | 0.95950 | No |
| 57 | H25 | 0.37870 | 0.20070 | 0.55210 | No |
| 58 | H26 | 0.62130 | 0.79930 | 0.05210 | No |
| 59 | H27 | 0.87870 | 0.29930 | 0.55210 | No |
| 60 | H28 | 0.12130 | 0.70070 | 0.05210 | No |
| 61 | H29 | 0.46340 | 0.23930 | 0.64530 | No |
| 62 | H30 | 0.53660 | 0.76070 | 0.14530 | No |
| 63 | H31 | 0.96340 | 0.26070 | 0.64530 | No |
| 64 | H32 | 0.03660 | 0.73930 | 0.14530 | No |
| 65 | H33 | 0.47240 | 0.11130 | 0.38550 | No |
| 66 | H34 | 0.52760 | 0.88870 | 0.88550 | No |
| 67 | H35 | 0.97240 | 0.38870 | 0.38550 | No |
| 68 | H36 | 0.02760 | 0.61130 | 0.88550 | No |
| 69 | H37 | 0.55860 | 0.15340 | 0.46910 | No |
| 70 | H38 | 0.44140 | 0.84660 | 0.96910 | No |
| 71 | H39 | 0.05860 | 0.34660 | 0.46910 | No |
| 72 | H40 | 0.94140 | 0.65340 | 0.96910 | No |
| 73 | H41 | 0.52810 | 0.99740 | 0.55630 | No |
| 74 | H42 | 0.47190 | 0.00260 | 0.05630 | No |
| 75 | H43 | 0.02810 | 0.50260 | 0.55630 | No |
| 76 | H44 | 0.97190 | 0.49740 | 0.05630 | No |
| 77 | H45 | 0.52650 | 0.07110 | 0.69690 | No |

|     |     |         |         |         |    |
|-----|-----|---------|---------|---------|----|
| 78  | H46 | 0.47350 | 0.92890 | 0.19690 | No |
| 79  | H47 | 0.02650 | 0.42890 | 0.69690 | No |
| 80  | H48 | 0.97350 | 0.57110 | 0.19690 | No |
| 81  | H49 | 0.37400 | 0.06910 | 0.70420 | No |
| 82  | H50 | 0.62600 | 0.93090 | 0.20420 | No |
| 83  | H51 | 0.87400 | 0.43090 | 0.70420 | No |
| 84  | H52 | 0.12600 | 0.56910 | 0.20420 | No |
| 85  | H53 | 0.40970 | 0.96290 | 0.71500 | No |
| 86  | H54 | 0.59030 | 0.03710 | 0.21500 | No |
| 87  | H55 | 0.90970 | 0.53710 | 0.71500 | No |
| 88  | H56 | 0.09030 | 0.46290 | 0.21500 | No |
| 89  | H57 | 0.33640 | 0.04580 | 0.44060 | No |
| 90  | H58 | 0.66360 | 0.95420 | 0.94060 | No |
| 91  | H59 | 0.83640 | 0.45420 | 0.44060 | No |
| 92  | H60 | 0.16360 | 0.54580 | 0.94060 | No |
| 93  | H61 | 0.37410 | 0.93990 | 0.44850 | No |
| 94  | H62 | 0.62590 | 0.06010 | 0.94850 | No |
| 95  | H63 | 0.87410 | 0.56010 | 0.44850 | No |
| 96  | H64 | 0.12590 | 0.43990 | 0.94850 | No |
| 97  | H65 | 0.26160 | 0.89450 | 0.61710 | No |
| 98  | H66 | 0.73840 | 0.10550 | 0.11710 | No |
| 99  | H67 | 0.76160 | 0.60550 | 0.61710 | No |
| 100 | H68 | 0.23840 | 0.39450 | 0.11710 | No |
| 101 | H69 | 0.22810 | 0.00160 | 0.63390 | No |
| 102 | H70 | 0.77190 | 0.99840 | 0.13390 | No |
| 103 | H71 | 0.72810 | 0.49840 | 0.63390 | No |
| 104 | H72 | 0.27190 | 0.50160 | 0.13390 | No |
| 105 | C1  | 0.44190 | 0.21900 | 0.54200 | No |
| 106 | C2  | 0.55810 | 0.78100 | 0.04200 | No |
| 107 | C3  | 0.94190 | 0.28100 | 0.54200 | No |
| 108 | C4  | 0.05810 | 0.71900 | 0.04200 | No |
| 109 | C5  | 0.49640 | 0.13340 | 0.48610 | No |
| 110 | C6  | 0.50360 | 0.86660 | 0.98610 | No |
| 111 | C7  | 0.99640 | 0.36660 | 0.48610 | No |
| 112 | C8  | 0.00360 | 0.63340 | 0.98610 | No |
| 113 | C9  | 0.49500 | 0.05130 | 0.60150 | No |
| 114 | C10 | 0.50500 | 0.94870 | 0.10150 | No |
| 115 | C11 | 0.99500 | 0.44870 | 0.60150 | No |

|     |     |         |         |         |    |
|-----|-----|---------|---------|---------|----|
| 116 | C12 | 0.00500 | 0.55130 | 0.10150 | No |
| 117 | C13 | 0.40380 | 0.01810 | 0.64510 | No |
| 118 | C14 | 0.59620 | 0.98190 | 0.14510 | No |
| 119 | C15 | 0.90380 | 0.48190 | 0.64510 | No |
| 120 | C16 | 0.09620 | 0.51810 | 0.14510 | No |
| 121 | C17 | 0.34450 | 0.99030 | 0.50940 | No |
| 122 | C18 | 0.65550 | 0.00970 | 0.00940 | No |
| 123 | C19 | 0.84450 | 0.50970 | 0.50940 | No |
| 124 | C20 | 0.15550 | 0.49030 | 0.00940 | No |
| 125 | C21 | 0.25450 | 0.95520 | 0.56120 | No |
| 126 | C22 | 0.74550 | 0.04480 | 0.06120 | No |
| 127 | C23 | 0.75450 | 0.54480 | 0.56120 | No |
| 128 | C24 | 0.24550 | 0.45520 | 0.06120 | No |
